# Supplementary material
Source: ML conference proceedings conference paper supplement (https://proceedings.mlr.press/v139/carderera21a.html)
Supplement: Supplementary file 2 [file carderera21a-supp.zip]

Archive with 75 entries (56 files):
- supp/
- supp/Parameter-free-LaCG-code-submission/
- supp/Parameter-free-LaCG-code-submission/environment.yaml
- supp/Parameter-free-LaCG-code-submission/examples/
- supp/Parameter-free-LaCG-code-submission/examples/algorithms/
- supp/Parameter-free-LaCG-code-submission/examples/algorithms/algos_config.json
- supp/Parameter-free-LaCG-code-submission/examples/algorithms/example_AFW.json
- supp/Parameter-free-LaCG-code-submission/examples/algorithms/example_DICG.json
- supp/Parameter-free-LaCG-code-submission/examples/algorithms/example_FW.json
- supp/Parameter-free-LaCG-code-submission/examples/algorithms/example_Lazy.json
- supp/Parameter-free-LaCG-code-submission/examples/algorithms/example_PFLaCG.json
- supp/Parameter-free-LaCG-code-submission/examples/algorithms/example_PFW.json
- supp/Parameter-free-LaCG-code-submission/examples/Example-Quadratic-ProbSimplex.ipynb
- supp/Parameter-free-LaCG-code-submission/examples/feasible_regions/
- supp/Parameter-free-LaCG-code-submission/examples/feasible_regions/example_birkhoff_polytope.json
- supp/Parameter-free-LaCG-code-submission/examples/feasible_regions/example_l1_ball.json
- supp/Parameter-free-LaCG-code-submission/examples/feasible_regions/example_l2_ball.json
- supp/Parameter-free-LaCG-code-submission/examples/feasible_regions/example_probability_simplex.json
- supp/Parameter-free-LaCG-code-submission/examples/feasible_regions/ran14x18-disj-8.mps
- supp/Parameter-free-LaCG-code-submission/examples/objective_functions/
- supp/Parameter-free-LaCG-code-submission/examples/objective_functions/example_quadratic.json
- supp/Parameter-free-LaCG-code-submission/examples/plots/
- supp/Parameter-free-LaCG-code-submission/examples/plots/example_plot_config.json
- supp/Parameter-free-LaCG-code-submission/Optimized_Code_for_ProbSimplex/
- supp/Parameter-free-LaCG-code-submission/Optimized_Code_for_ProbSimplex/environment.yaml
- supp/Parameter-free-LaCG-code-submission/Optimized_Code_for_ProbSimplex/examples/
- supp/Parameter-free-LaCG-code-submission/Optimized_Code_for_ProbSimplex/examples/algorithms/
- supp/Parameter-free-LaCG-code-submission/Optimized_Code_for_ProbSimplex/examples/algorithms/example_AFW.json
- supp/Parameter-free-LaCG-code-submission/Optimized_Code_for_ProbSimplex/examples/algorithms/example_DICG.json
- supp/Parameter-free-LaCG-code-submission/Optimized_Code_for_ProbSimplex/examples/algorithms/example_FW.json
- supp/Parameter-free-LaCG-code-submission/Optimized_Code_for_ProbSimplex/examples/algorithms/example_PFLaCG.json
- supp/Parameter-free-LaCG-code-submission/Optimized_Code_for_ProbSimplex/examples/algorithms/example_PFW.json
- supp/Parameter-free-LaCG-code-submission/Optimized_Code_for_ProbSimplex/examples/feasible_regions/
- supp/Parameter-free-LaCG-code-submission/Optimized_Code_for_ProbSimplex/examples/feasible_regions/example_probability_simplex.json
- supp/Parameter-free-LaCG-code-submission/Optimized_Code_for_ProbSimplex/examples/objective_functions/
- supp/Parameter-free-LaCG-code-submission/Optimized_Code_for_ProbSimplex/examples/objective_functions/example_quadratic.json
- supp/Parameter-free-LaCG-code-submission/Optimized_Code_for_ProbSimplex/pflacg/
- supp/Parameter-free-LaCG-code-submission/Optimized_Code_for_ProbSimplex/pflacg/algorithms/
- supp/Parameter-free-LaCG-code-submission/Optimized_Code_for_ProbSimplex/pflacg/algorithms/fw_variants_simplex.py
- supp/Parameter-free-LaCG-code-submission/Optimized_Code_for_ProbSimplex/pflacg/algorithms/pflacg_simplex.py
- supp/Parameter-free-LaCG-code-submission/Optimized_Code_for_ProbSimplex/pflacg/algorithms/_abstract_algorithm.py
- supp/Parameter-free-LaCG-code-submission/Optimized_Code_for_ProbSimplex/pflacg/algorithms/_algorithms_utils.py
- supp/Parameter-free-LaCG-code-submission/Optimized_Code_for_ProbSimplex/pflacg/algorithms/__init__.py
- supp/Parameter-free-LaCG-code-submission/Optimized_Code_for_ProbSimplex/pflacg/experiments/
- supp/Parameter-free-LaCG-code-submission/Optimized_Code_for_ProbSimplex/pflacg/experiments/experiments_driver.py
- supp/Parameter-free-LaCG-code-submission/Optimized_Code_for_ProbSimplex/pflacg/experiments/feasible_regions.py
- supp/Parameter-free-LaCG-code-submission/Optimized_Code_for_ProbSimplex/pflacg/experiments/objective_functions.py
- supp/Parameter-free-LaCG-code-submission/Optimized_Code_for_ProbSimplex/pflacg/experiments/__init__.py
- supp/Parameter-free-LaCG-code-submission/Optimized_Code_for_ProbSimplex/pflacg/__init__.py
- supp/Parameter-free-LaCG-code-submission/Optimized_Code_for_ProbSimplex/README.md
- supp/Parameter-free-LaCG-code-submission/Optimized_Code_for_ProbSimplex/useful_scripts/
- supp/Parameter-free-LaCG-code-submission/Optimized_Code_for_ProbSimplex/useful_scripts/generate_feasible_regions.py
- supp/Parameter-free-LaCG-code-submission/Optimized_Code_for_ProbSimplex/useful_scripts/generate_objective_functions-Quadratic-Natural.py
- supp/Parameter-free-LaCG-code-submission/Optimized_Code_for_ProbSimplex/useful_scripts/PFLaCG-testing-ProbabilitySimplexPolytope.py
- supp/Parameter-free-LaCG-code-submission/Optimized_Code_for_ProbSimplex/useful_scripts/PFLaCG-testing-ProbabilitySimplexPolytope_normal.py
- supp/Parameter-free-LaCG-code-submission/Optimized_Code_for_ProbSimplex/useful_scripts/run_experiments_final.sh
- supp/Parameter-free-LaCG-code-submission/Optimized_Code_for_ProbSimplex/useful_scripts/run_experiments_pre_final.sh
- supp/Parameter-free-LaCG-code-submission/Optimized_Code_for_ProbSimplex/useful_scripts/test_file_simplex.py
- supp/Parameter-free-LaCG-code-submission/pflacg/
- supp/Parameter-free-LaCG-code-submission/pflacg/algorithms/
- supp/Parameter-free-LaCG-code-submission/pflacg/algorithms/fw_variants.py
- supp/Parameter-free-LaCG-code-submission/pflacg/algorithms/pflacg.py
- supp/Parameter-free-LaCG-code-submission/pflacg/algorithms/project_onto_active_set_jit.py
- supp/Parameter-free-LaCG-code-submission/pflacg/algorithms/_abstract_algorithm.py
- supp/Parameter-free-LaCG-code-submission/pflacg/algorithms/_algorithms_utils.py
- supp/Parameter-free-LaCG-code-submission/pflacg/algorithms/__init__.py
- supp/Parameter-free-LaCG-code-submission/pflacg/experiments/
- supp/Parameter-free-LaCG-code-submission/pflacg/experiments/experiments_driver.py
- supp/Parameter-free-LaCG-code-submission/pflacg/experiments/experiments_helper.py
- supp/Parameter-free-LaCG-code-submission/pflacg/experiments/feasible_regions.py
- supp/Parameter-free-LaCG-code-submission/pflacg/experiments/objective_functions.py
- supp/Parameter-free-LaCG-code-submission/pflacg/experiments/__init__.py
- supp/Parameter-free-LaCG-code-submission/pflacg/__init__.py
- supp/Parameter-free-LaCG-code-submission/README.md
- supp/Parameter_free_Frank_Wolfe.pdf
