# Supplementary material
Source: ML conference proceedings conference paper supplement (https://proceedings.mlr.press/v139/carderera21a.html)
Supplement: Supplementary file 2 [file carderera21a-supp.zip › supp/Parameter-free-LaCG-code-submission/environment.yaml]

name: pflacg
channels:
  - numba
  - gurobi
  - anaconda
  - conda-forge
  - http://conda.anaconda.org/gurobi
  - defaults
dependencies:
  - _libgcc_mutex=0.1=main
  - appdirs=1.4.4=pyh9f0ad1d_0
  - argon2-cffi=20.1.0=py38h7b6447c_1
  - async_generator=1.10=py_0
  - attrs=20.2.0=py_0
  - backcall=0.2.0=py_0
  - black=20.8b1=py_1
  - blas=1.0=openblas
  - bleach=3.2.1=py_0
  - ca-certificates=2020.10.14=0
  - certifi=2020.6.20=py38_0
  - cffi=1.14.3=py38he30daa8_0
  - click=7.1.2=pyh9f0ad1d_0
  - cvxopt=1.2.0=py38h75fe3a5_0
  - cycler=0.10.0=py_2
  - dataclasses=0.7=pyhb2cacf7_7
  - dbus=1.13.18=hb2f20db_0
  - decorator=4.4.2=py_0
  - defusedxml=0.6.0=py_0
  - entrypoints=0.3=py38_0
  - expat=2.2.10=he6710b0_2
  - fftw=3.3.8=h7b6447c_3
  - fontconfig=2.13.0=h9420a91_0
  - freetype=2.10.4=h5ab3b9f_0
  - glib=2.56.2=hd408876_0
  - glpk=4.65=h3ceedfd_2
  - gmp=6.1.2=hb3b607b_0
  - gsl=2.4=h14c3975_4
  - gst-plugins-base=1.14.0=hbbd80ab_1
  - gstreamer=1.14.0=hb453b48_1
  - gurobi=9.1.1=py38_0
  - icu=58.2=he6710b0_3
  - importlib-metadata=2.0.0=py_1
  - importlib_metadata=2.0.0=1
  - iniconfig=1.1.1=py_0
  - ipykernel=5.3.4=py38h5ca1d4c_0
  - ipython=7.18.1=py38h5ca1d4c_0
  - ipython_genutils=0.2.0=py38_0
  - ipywidgets=7.5.1=py_1
  - jedi=0.18.0=py38h06a4308_1
  - jinja2=2.11.2=py_0
  - jpeg=9b=habf39ab_1
  - jsonschema=3.2.0=py_2
  - jupyter=1.0.0=py38_7
  - jupyter_client=6.1.7=py_0
  - jupyter_console=6.2.0=py_0
  - jupyter_core=4.6.3=py38_0
  - jupyterlab_pygments=0.1.2=py_0
  - kiwisolver=1.3.1=py38h82cb98a_0
  - lcms2=2.11=h396b838_0
  - ld_impl_linux-64=2.33.1=h53a641e_7
  - libedit=3.1.20191231=h14c3975_1
  - libffi=3.3=he6710b0_2
  - libgcc-ng=9.1.0=hdf63c60_0
  - libgfortran-ng=7.3.0=hdf63c60_0
  - libopenblas=0.3.10=h5a2b251_0
  - libpng=1.6.37=hbc83047_0
  - libsodium=1.0.18=h7b6447c_0
  - libstdcxx-ng=9.1.0=hdf63c60_0
  - libtiff=4.1.0=h2733197_1
  - libuuid=1.0.3=h1bed415_2
  - libxcb=1.14=h7b6447c_0
  - libxml2=2.9.10=hb55368b_3
  - llvmlite=0.36.0rc1=py38hf484d3e_0
  - lz4-c=1.9.2=he1b5a44_3
  - markupsafe=1.1.1=py38h7b6447c_0
  - matplotlib=3.3.2=h06a4308_0
  - matplotlib-base=3.3.2=py38h817c723_0
  - metis=5.1.0=hf484d3e_4
  - mistune=0.8.4=py38h7b6447c_1000
  - more-itertools=8.5.0=py_0
  - mypy_extensions=0.4.3=py38h578d9bd_3
  - nbclient=0.5.1=py_0
  - nbconvert=6.0.7=py38_0
  - nbformat=5.0.8=py_0
  - ncurses=6.2=he6710b0_1
  - nest-asyncio=1.4.1=py_0
  - networkx=2.5=py_0
  - notebook=6.1.4=py38_0
  - numba=0.53.0rc1=np1.11py3.8h04863e7_ga3d29a7f4_0
  - numpy=1.19.1=py38h30dfecb_0
  - numpy-base=1.19.1=py38h75fe3a5_0
  - olefile=0.46=pyh9f0ad1d_1
  - openssl=1.1.1h=h7b6447c_0
  - packaging=20.4=py_0
  - pandoc=2.11=hb0f4dca_0
  - pandocfilters=1.4.2=py38_1
  - parso=0.8.0=py_0
  - pathspec=0.8.1=pyhd3deb0d_0
  - pcre=8.44=he6710b0_0
  - pexpect=4.8.0=py38_0
  - pickleshare=0.7.5=py38_1000
  - pillow=8.1.0=py38he98fc37_0
  - pip=20.2.4=py38_0
  - pluggy=0.13.1=py38_0
  - prometheus_client=0.8.0=py_0
  - prompt-toolkit=3.0.8=py_0
  - prompt_toolkit=3.0.8=0
  - ptyprocess=0.6.0=py38_0
  - py=1.9.0=py_0
  - pycparser=2.20=py_2
  - pygments=2.7.1=py_0
  - pyparsing=2.4.7=py_0
  - pyqt=5.9.2=py38h05f1152_4
  - pyrsistent=0.17.3=py38h7b6447c_0
  - pytest=6.1.1=py38_0
  - python=3.8.5=h7579374_1
  - python-dateutil=2.8.1=py_0
  - python_abi=3.8=1_cp38
  - pyzmq=19.0.2=py38he6710b0_1
  - qt=5.9.7=h5867ecd_1
  - qtconsole=4.7.7=py_0
  - qtpy=1.9.0=py_0
  - readline=8.1=h27cfd23_0
  - regex=2020.11.13=py38h25fe258_0
  - scipy=1.5.2=py38habc2bb6_0
  - send2trash=1.5.0=py38_0
  - setuptools=52.0.0=py38h06a4308_0
  - sip=4.19.24=py38he6710b0_0
  - six=1.15.0=py_0
  - sqlite=3.33.0=h62c20be_0
  - suitesparse=5.2.0=h2ffa06c_0
  - tbb=2020.3=hfd86e86_0
  - terminado=0.9.1=py38_0
  - testpath=0.4.4=py_0
  - tk=8.6.10=hbc83047_0
  - toml=0.10.2=pyhd8ed1ab_0
  - tornado=6.0.4=py38h7b6447c_1
  - traitlets=5.0.5=py_0
  - typed-ast=1.4.2=py38h27cfd23_1
  - typing_extensions=3.7.4.3=py_0
  - wcwidth=0.2.5=py_0
  - webencodings=0.5.1=py38_1
  - wheel=0.36.2=pyhd3eb1b0_0
  - widgetsnbextension=3.5.1=py38_0
  - xz=5.2.5=h7b6447c_0
  - zeromq=4.3.3=he6710b0_3
  - zipp=3.3.1=py_0
  - zlib=1.2.11=h7b6447c_3
  - zstd=1.4.5=h9ceee32_0
