# Supplementary material
Source: ML conference proceedings conference paper supplement (https://proceedings.mlr.press/v139/carderera21a.html)
Supplement: Supplementary file 2 [file carderera21a-supp.zip › supp/Parameter-free-LaCG-code-submission/examples/algorithms/algos_config.json]

[
  {
    "name": "AFW(L)",
    "class_name": "FrankWolfe",
    "args": {
      "fw_variant": "lazy",
      "step_type": "line_search"
    }
  },
  {
    "name": "PFLaCG-AFW(L)",
    "class_name": "ParameterFreeLaCG",
    "args": {
      "fw_variant": "lazy",
      "iter_sync": false
    }
  },
  {
    "name": "PFLaCG-PFW",
    "class_name": "ParameterFreeLaCG",
    "args": {
      "fw_variant": "PFW",
      "iter_sync": false
    }
  },
  {
    "name": "PFLaCG-AFW",
    "class_name": "ParameterFreeLaCG",
    "args": {
      "fw_variant": "AFW",
      "iter_sync": false
    }
  },
  {
    "name": "AFW",
    "class_name": "FrankWolfe",
    "args": {
      "fw_variant": "AFW",
      "step_type": "line_search"
    }
  },
  {
    "name": "PFW",
    "class_name": "FrankWolfe",
    "args": {
      "fw_variant": "PFW",
      "step_type": "line_search"
    }
  }
]
