# Supplementary material
Source: ML conference proceedings conference paper supplement (https://proceedings.mlr.press/v139/carderera21a.html)
Supplement: Supplementary file 2 [file carderera21a-supp.zip › supp/Parameter-free-LaCG-code-submission/examples/Example-Quadratic-ProbSimplex.ipynb]

# %% [markdown]
In this Jupyter notebook, we provide an example starting code for using our `pflacg` module. This is intended to serve as an instructional example and not as a proof of performance as shown in the paper.

Please read `README.md` before continuing.

# %% [code]
import logging

import matplotlib.pyplot as plt
import numpy as np

import pflacg


# Configure logging
logging.basicConfig(
    level=logging.INFO,
    format="%(levelname)s :: %(asctime)s :: %(message)s",
    datefmt="%Y-%m-%d %H:%M:%S",
)

# %% [code]
# Random seeding numpy for reproducbility. (Optional)
RANDOM_SEED = 1
np.random.seed(RANDOM_SEED)

# %% [markdown]
---------

# %% [markdown]
# Experiment Setups

# %% [code]
# Instantiating exit criterion object for determine when to halt an algorithm run.
exit_criterion = pflacg.ExitCriterion(
    "SWG",
    1.0e-4,
    criterion_reference=0.0,
    max_time=60.0,
    max_iter=1000
)

# %% [code]
dimension = 10
feasible_region = pflacg.ProbabilitySimplexPolytope(dimension)

# %% [code]
# Constructing a random quadratic function object as described in Appendix D.
matrix = np.random.rand(dimension, dimension)
M = matrix.T.dot(matrix)
M = M + np.identity(dimension)
b = np.random.rand(dimension)
objective_function = pflacg.Quadratic(dimension, M, b)


# Constructing the probability simplex polytope object.
feasible_region = pflacg.ProbabilitySimplexPolytope(dimension)

# Constructing an initial point object (Optional)
point_initial = pflacg.Point(
    feasible_region.initial_point,
    (1,),
    (feasible_region.initial_point,)
)

# Displaying the objective function paramter for reference.
print(f"strong convexity paramter = {objective_function.Mu}")
print(f"smoothness parameter = {objective_function.L}")

# %% [markdown]
----------

# Algorithms

# %% [code]
# Instantiating PFLaCG algorithm object.
PFLaCG = pflacg.ParameterFreeLaCG(fw_variant="AFW", iter_sync=False, recompile_jit=True)

# %% [code]
# Instantiating other CG algorithm objects.
AFW_algorithm = pflacg.FrankWolfe("AFW", "line_search")
PFW_algorithm = pflacg.FrankWolfe("PFW", "line_search")

# %% [markdown]
----------

# Running the algorithms

# %% [code]
# Running PFLaCG.
PFLaCG_run = PFLaCG.run(objective_function, feasible_region, exit_criterion, point_initial)

# %% [code]
# Running other CG algorithms.
AFW_run = AFW_algorithm.run(objective_function, feasible_region, exit_criterion, point_initial)
PFW_run = PFW_algorithm.run(objective_function, feasible_region, exit_criterion, point_initial)

# %% [markdown]
-----------
# Displaying the run results

The run results are returned as a list of tuples which each tuple represents `(iteration, duration, f_val, wolfe_gap, strong_wolfe_gap)`. `wolfe_gap` and `strong_wolfe_gap` are displayed if available otherwise 0.

# %% [code]
print("Run result for PFLaCGL:")
for run_status in PFLaCG_run:
    print(run_status)

# %% [code]
