# Supplementary material
Source: ML conference proceedings conference paper supplement (https://proceedings.mlr.press/v139/carderera21a.html)
Supplement: Supplementary file 2 [file carderera21a-supp.zip › supp/Parameter-free-LaCG-code-submission/examples/feasible_regions/ran14x18-disj-8.mps]

NAME           ran14x18-disj-8
ROWS
 N  obj     
 E  A0      
 E  A1      
 E  A2      
 E  A3      
 E  A4      
 E  A5      
 E  A6      
 E  A7      
 E  A8      
 E  A9      
 E  A10     
 E  A11     
 E  A12     
 E  A13     
 E  B0      
 E  B1      
 E  B2      
 E  B3      
 E  B4      
 E  B5      
 E  B6      
 E  B7      
 E  B8      
 E  B9      
 E  B10     
 E  B11     
 E  B12     
 E  B13     
 E  B14     
 E  B15     
 E  B16     
 E  B17     
 G  G0      
 G  G1      
 G  G2      
 G  G3      
 G  G4      
 G  G5      
 G  G6      
 G  G7      
 G  G8      
 G  G9      
 G  G10     
 G  G11     
 G  G12     
 G  G13     
 G  G14     
 G  G15     
 G  G16     
 G  G17     
 G  G18     
 G  G19     
 G  G20     
 G  G21     
 G  G22     
 G  G23     
 G  G24     
 G  G25     
 G  G26     
 G  G27     
 G  G28     
 G  G29     
 G  G30     
 G  G31     
 G  G32     
 G  G33     
 G  G34     
 G  G35     
 G  G36     
 G  G37     
 G  G38     
 G  G39     
 G  G40     
 G  G41     
 G  G42     
 G  G43     
 G  G44     
 G  G45     
 G  G46     
 G  G47     
 G  G48     
 G  G49     
 G  G50     
 G  G51     
 G  G52     
 G  G53     
 G  G54     
 G  G55     
 G  G56     
 G  G57     
 G  G58     
 G  G59     
 G  G60     
 G  G61     
 G  G62     
 G  G63     
 G  G64     
 G  G65     
 G  G66     
 G  G67     
 G  G68     
 G  G69     
 G  G70     
 G  G71     
 G  G72     
 G  G73     
 G  G74     
 G  G75     
 G  G76     
 G  G77     
 G  G78     
 G  G79     
 G  G80     
 G  G81     
 G  G82     
 G  G83     
 G  G84     
 G  G85     
 G  G86     
 G  G87     
 G  G88     
 G  G89     
 G  G90     
 G  G91     
 G  G92     
 G  G93     
 G  G94     
 G  G95     
 G  G96     
 G  G97     
 G  G98     
 G  G99     
 G  G100    
 G  G101    
 G  G102    
 G  G103    
 G  G104    
 G  G105    
 G  G106    
 G  G107    
 G  G108    
 G  G109    
 G  G110    
 G  G111    
 G  G112    
 G  G113    
 G  G114    
 G  G115    
 G  G116    
 G  G117    
 G  G118    
 G  G119    
 G  G120    
 G  G121    
 G  G122    
 G  G123    
 G  G124    
 G  G125    
 G  G126    
 G  G127    
 G  G128    
 G  G129    
 G  G130    
 G  G131    
 G  G132    
 G  G133    
 G  G134    
 G  G135    
 G  G136    
 G  G137    
 G  G138    
 G  G139    
 G  G140    
 G  G141    
 G  G142    
 G  G143    
 G  G144    
 G  G145    
 G  G146    
 G  G147    
 G  G148    
 G  G149    
 G  G150    
 G  G151    
 G  G152    
 G  G153    
 G  G154    
 G  G155    
 G  G156    
 G  G157    
 G  G158    
 G  G159    
 G  G160    
 G  G161    
 G  G162    
 G  G163    
 G  G164    
 G  G165    
 G  G166    
 G  G167    
 G  G168    
 G  G169    
 G  G170    
 G  G171    
 G  G172    
 G  G173    
 G  G174    
 G  G175    
 G  G176    
 G  G177    
 G  G178    
 G  G179    
 G  G180    
 G  G181    
 G  G182    
 G  G183    
 G  G184    
 G  G185    
 G  G186    
 G  G187    
 G  G188    
 G  G189    
 G  G190    
 G  G191    
 G  G192    
 G  G193    
 G  G194    
 G  G195    
 G  G196    
 G  G197    
 G  G198    
 G  G199    
 G  G200    
 G  G201    
 G  G202    
 G  G203    
 G  G204    
 G  G205    
 G  G206    
 G  G207    
 G  G208    
 G  G209    
 G  G210    
 G  G211    
 G  G212    
 G  G213    
 G  G214    
 G  G215    
 G  G216    
 G  G217    
 G  G218    
 G  G219    
 G  G220    
 G  G221    
 G  G222    
 G  G223    
 G  G224    
 G  G225    
 G  G226    
 G  G227    
 G  G228    
 G  G229    
 G  G230    
 G  G231    
 G  G232    
 G  G233    
 G  G234    
 G  G235    
 G  G236    
 G  G237    
 G  G238    
 G  G239    
 G  G240    
 G  G241    
 G  G242    
 G  G243    
 G  G244    
 G  G245    
 G  G246    
 G  G247    
 G  G248    
 G  G249    
 G  G250    
 G  G251    
 G  c1      
 G  c3      
 G  c4      
 G  c7      
 G  c8      
 G  c11     
 G  c12     
 G  c14     
 G  c15     
 G  c16     
 G  c17     
 G  c18     
 G  c19     
 G  c20     
 G  c21     
 G  c22     
 G  c24     
 G  c25     
 G  c26     
 G  c27     
 G  c29     
 G  c30     
 G  c32     
 G  c33     
 G  c34     
 G  c35     
 G  c36     
 G  c37     
 G  c39     
 G  c40     
 G  c42     
 G  c43     
 G  c45     
 G  c46     
 G  c47     
 G  c48     
 G  c49     
 G  c50     
 G  c51     
 G  c52     
 G  c54     
 G  c55     
 G  c56     
 G  c58     
 G  c59     
 G  c60     
 G  c61     
 G  c62     
 G  c63     
 G  c64     
 G  c65     
 G  c66     
 G  c68     
 G  c69     
 G  c70     
 G  c71     
 G  c72     
 G  c73     
 G  c76     
 G  c77     
 G  c78     
 G  c79     
 G  c80     
 G  c81     
 G  c82     
 G  c83     
 G  c84     
 G  c85     
 G  c86     
 G  c87     
 G  c88     
 G  c89     
 G  c90     
 G  c91     
 G  c92     
 G  c93     
 G  c94     
 G  c95     
 G  c96     
 G  c97     
 G  c98     
 G  c99     
 G  c100    
 G  c101    
 G  c102    
 G  c103    
 G  c104    
 G  c105    
 G  c106    
 G  c107    
 G  c108    
 G  c109    
 G  c110    
 G  c111    
 G  c112    
 G  c113    
 G  c123    
 G  c127    
 G  c147    
 G  c465    
 G  c574    
 G  c789    
 G  c797    
 G  c959    
 G  c985    
 G  c1037   
 G  c1119   
 G  c1179   
 G  c1186   
 G  c1188   
 G  c1230   
 G  c1360   
 G  c1398   
 G  c1432   
 G  c1449   
 G  c1465   
 G  c1468   
 G  c1541   
 G  c1564   
 G  c1577   
 G  c1629   
 G  c1630   
 G  c1662   
 G  c1691   
 G  c1712   
 G  c1716   
 G  c1722   
 G  c1731   
 G  c1733   
 G  c1759   
 G  c1763   
 G  c1764   
 G  c1768   
 G  c1771   
 G  c1785   
 G  c1797   
 G  c1813   
 G  c1814   
 G  c1853   
 G  c1861   
 G  c1862   
 G  c1866   
 G  c1869   
 G  c1871   
 G  c1872   
 G  c1878   
 G  c1879   
 G  c1880   
 G  c1883   
 G  c1886   
 G  c1890   
 G  c1892   
 G  c1895   
 G  c1896   
 G  c1897   
 G  c1900   
 G  c1902   
 G  c1903   
 G  c1904   
 G  c1907   
 G  c1908   
 G  c1913   
 G  c1914   
COLUMNS
    MARK0000  'MARKER'                 'INTORG'
    X0        obj                202   G0                   6
    X0        c21                  1   c86                  1
    X0        c797      2.0532104917   c1564     0.5322312693
    X0        c1577      1.599815628   c1722     0.0037999252
    X0        c1731     0.0119258609   c1764     0.5934436932
    X0        c1797     0.0134962558   c1861     0.0288260414
    X0        c1869     5.4055739E-5   c1879     1.3544655198
    X1        obj                222   G1                  13
    X1        c21                  1   c59                  1
    X1        c63                  1   c86                  1
    X1        c104                 7   c797      2.2374729717
    X1        c1564     0.6312339333   c1577     2.0932167095
    X1        c1722     0.0045066888   c1731     0.0156039302
    X1        c1764     0.7751395838   c1797     0.0134962558
    X1        c1861     0.0288260414   c1869     6.1081838E-5
    X1        c1879     1.3630221582
    X2        obj                100   G2                  21
    X2        c21                  1   c59                  1
    X2        c63                  1   c86                  1
    X2        c797      2.1255993231   c1564     0.6053012351
    X2        c1577      1.599815628   c1722     0.0043215596
    X2        c1731     0.0119258609   c1764     0.5934438136
    X2        c1797     0.0134962558   c1861     0.0288260414
    X2        c1869     5.5961550E-5   c1879     1.3544655198
    X3        obj                174   G3                  11
    X3        c21                  1   c59                  1
    X3        c63                  1   c76                  1
    X3        c86                  1   c789      0.3673904415
    X3        c797      2.1255993231   c1564     0.6054300484
    X3        c1577      1.599815628   c1722     0.0044049402
    X3        c1731     0.0119749783   c1759     0.5195719363
    X3        c1764     0.5935339765   c1797     0.0134962558
    X3        c1861     0.0288260414   c1869     7.3434104E-5
    X3        c1878     0.1671567868   c1879     1.3544655198
    X3        c1913     0.7971014492
    X4        obj                116   G4                  20
    X4        c42                  1   c59                  1
    X4        c63                  1   c68                  7
    X4        c86                  1   c99                  8
    X4        c104                 7   c106                 1
    X4        c797      2.2374729717   c1398     0.4716125521
    X4        c1564     1.8142211458   c1577     2.0932167095
    X4        c1722     0.3086498467   c1731     0.0156039302
    X4        c1763              8.5   c1764      0.921220139
    X4        c1797     0.0134962558   c1861     0.0288260414
    X4        c1869     9.6485388E-5   c1879     2.0837931075
    X4        c1907     1.2364760433
    X5        obj                253   G5                   4
    X5        c21                  1   c59                  1
    X5        c63                  1   c86                  1
    X5        c797      2.1255993231   c1564     0.6053012351
    X5        c1577      1.599815628   c1722     0.0043215596
    X5        c1731     0.0119258609   c1764     0.5934438136
    X5        c1797     0.0134962558   c1861     0.0288260414
    X5        c1869     5.5961550E-5   c1879     1.3544655198
    X6        obj                252   G6                  21
    X6        c21                  1   c40                  1
    X6        c59                  1   c63                  1
    X6        c71                  1   c86                  1
    X6        c93                  9   c102                 9
    X6        c110                 9   c797      2.1255993231
    X6        c1179     1.1370977491   c1186     2.0164034688
    X6        c1449     0.8141570704   c1468     0.5634005500
    X6        c1564     0.6053096750   c1577      1.599815628
    X6        c1722     0.0046388977   c1731     0.0119258609
    X6        c1764     0.5949422274   c1771     0.9071304781
    X6        c1785     0.0033986843   c1797     0.0134962558
    X6        c1853     0.8803422982   c1861     0.0288260414
    X6        c1862     0.6951843146   c1869     0.1823175346
    X6        c1879     1.3544655198   c1908     0.0815842460
    X7        obj                113   G7                  13
    X7        c21                  1   c47                  7
    X7        c63                  1   c68                  7
    X7        c99                  1   c104                 7
    X7        c797      2.2374729717   c1564     0.6406158062
    X7        c1577     2.0184589699   c1722     0.0045736645
    X7        c1731     0.0150466469   c1764     0.7476105882
    X7        c1797     0.0134962558   c1861     0.0288260414
    X7        c1869     6.5325339E-5   c1879     2.8131206951
    X8        obj                261   G8                  20
    X8        c3                   1   c21                  1
    X8        c59                  1   c63                  1
    X8        c81                  3   c86                  1
    X8        c105                10   c465      0.6708004509
    X8        c797      2.1255993231   c1360     0.5317247542
    X8        c1564     0.6725114081   c1577      1.599815628
    X8        c1629     0.5968331303   c1691     0.1274325006
    X8        c1722     0.0068507570   c1731     0.1466079490
    X8        c1764     0.6619438893   c1768     1.5596330275
    X8        c1797     0.4711593496   c1861     0.4295611028
    X8        c1869     0.0033245310   c1879     1.3544655198
    X8        c1883     0.6277635365   c1902     4.2857142857
    X9        obj                240   G9                   9
    X9        c21                  1   c59                  1
    X9        c63                  1   c86                  1
    X9        c797      2.1255993231   c1564     0.6053012351
    X9        c1577      1.599815628   c1722     0.0043215596
    X9        c1731     0.0119258609   c1764     0.5934438136
    X9        c1797     0.0134962558   c1861     0.0288260414
    X9        c1869     5.5961550E-5   c1879     1.3544655198
    X10       obj                106   G10                  7
    X10       c21                  1   c59                  1
    X10       c63                  1   c797      2.2374729717
    X10       c1564     0.5749439487   c1577     1.7044764634
    X10       c1722     0.0041048439   c1731     0.1995101548
    X10       c1764     0.6319854872   c1797     0.0134962558
    X10       c1861     0.0288260414   c1869     5.8906895E-5
    X10       c1879     1.3544655198
    X11       obj                146   G11                 18
    X11       c21                  1   c59                  1
    X11       c63                  1   c86                  1
    X11       c797      2.1255993231   c1564     0.6053012351
    X11       c1577      1.599815628   c1722     0.0043215596
    X11       c1731     0.0119258609   c1764     0.5934438136
    X11       c1797     0.0134962558   c1861     0.0288260414
    X11       c1869     5.5961550E-5   c1879     1.3544655198
    X12       obj                 76   G12                 14
    X12       c21                  1   c47                  8
    X12       c59                  1   c68                  1
    X12       c86                  1   c99                  8
    X12       c104                 1   c797      2.2374729717
    X12       c1564     0.7062876636   c1577     2.0932167095
    X12       c1722     0.0050424850   c1731     0.0156039302
    X12       c1764     0.7751408606   c1797     0.0134962558
    X12       c1861     0.0288260414   c1869     7.1743784E-5
    X12       c1879     2.9173103504
    X13       obj                169   G13                 21
    X13       c21                  1   c29                  1
    X13       c59                  1   c63                  1
    X13       c86                  1   c789      1.3667909252
    X13       c797      2.6191595375   c1564     0.6054899061
    X13       c1577      1.599815628   c1722     0.0049079136
    X13       c1731     0.0120284051   c1759     1.2787251163
    X13       c1764     0.5937751607   c1797     0.0157985583
    X13       c1861     0.0337434249   c1869     1.0280544E-4
    X13       c1878     0.6964866119   c1879     1.3544655198
    X13       c1913     0.7246376811
    X14       obj                247   G14                 21
    X14       c11                  1   c21                  1
    X14       c32                  1   c59                  1
    X14       c63                  1   c86                  1
    X14       c88                  1   c797      2.1255993231
    X14       c1564     0.6654333704   c1577     2.0079928863
    X14       c1662     0.6442616092   c1722     0.8246252243
    X14       c1731     0.0237553850   c1733     1.1210191083
    X14       c1764     0.8225599834   c1797     0.0274444226
    X14       c1861     0.0586172987   c1869     3.2553034E-4
    X14       c1879     1.3544655198
    X15       obj                194   G15                 21
    X15       c21                  1   c52                  1
    X15       c59                  1   c63                  1
    X15       c86                  1   c97                  1
    X15       c797      2.1255993231   c1037     0.6241068439
    X15       c1119     1.4398937773   c1432     0.6719608434
    X15       c1465      1.735969697   c1564     0.6574069136
    X15       c1577      1.599815628   c1722     0.0046935334
    X15       c1731     0.0121499493   c1764     0.6264820862
    X15       c1785     1.5021517416   c1797     0.0134962558
    X15       c1814     1.0926170059   c1861     0.0288260414
    X15       c1866     1.5927418895   c1869     1.5221353486
    X15       c1879     1.3544655198   c1886     0.5696795415
    X15       c1895     0.7296289701   c1896     1.3514213278
    X16       obj                208   G16                 11
    X16       c1                   1   c21                  1
    X16       c59                  1   c63                  1
    X16       c86                  1   c797      2.1255993231
    X16       c1037     0.5777670657   c1119     0.7280271006
    X16       c1432     0.9588930453   c1465     0.8894092428
    X16       c1564     0.6065434753   c1577      1.599815628
    X16       c1722     0.0043699701   c1731     0.0119743988
    X16       c1764     0.5996217961   c1785     1.6499534209
    X16       c1797     0.0134962558   c1814     0.8332427030
    X16       c1861     0.0288260414   c1866     0.9145638061
    X16       c1869     1.1068988064   c1871     1.3147410359
    X16       c1872              6.6   c1879     1.3544655198
    X16       c1886     0.5672609886   c1895     0.4059525955
    X16       c1896     0.8277789340
    X17       obj                242   G17                  8
    X17       c21                  1   c59                  1
    X17       c63                  1   c86                  1
    X17       c797      2.1255993231   c1564     0.6053012351
    X17       c1577      1.599815628   c1722     0.0043215596
    X17       c1731     0.0119258609   c1764     0.5934438136
    X17       c1797     0.0134962558   c1861     0.0288260414
    X17       c1869     5.5961550E-5   c1879     1.3544655198
    X18       obj                190   G18                  6
    X18       c12                  1   c36                  1
    X18       c55                  1   c1037     1.1459084486
    X18       c1119     0.7493758712   c1432     0.9996217942
    X18       c1465     0.9034651199   c1564     0.0014208563
    X18       c1722     3.2745795E-5   c1731     1.3046423E-4
    X18       c1764     0.0063128998   c1785     1.0729760751
    X18       c1814     0.7441096678   c1866     0.7635637453
    X18       c1869     0.8006808998   c1872              6.6
    X18       c1886     1.1341997211   c1895     0.3797268617
    X18       c1896     0.8068421110
    X19       obj                158   G19                 13
    X19       c26                  8   c35                  1
    X19       c36                  1   c55                  1
    X19       c94                  2   c1037     2.6087666078
    X19       c1119     1.9373541551   c1432     2.3646587204
    X19       c1465     2.3357195916   c1564     0.0033060263
    X19       c1722     9.4656914E-5   c1731     2.8540753E-4
    X19       c1764     0.0163206794   c1785     2.6170082563
    X19       c1814     1.8845324501   c1866     2.1449936078
    X19       c1869     2.1718869261   c1871     1.7529880478
    X19       c1872             24.2   c1886      2.329035521
    X19       c1895     0.9817041640   c1896      2.041327429
    X20       obj                243   G20                 19
    X20       c12                  1   c35                  1
    X20       c36                  1   c55                  2
    X20       c94                  2   c1037     1.9010777299
    X20       c1119     0.7781669424   c1432     1.8189682464
    X20       c1465     1.3079063772   c1564     0.0028417126
    X20       c1722     5.7404163E-5   c1731     2.3458051E-4
    X20       c1764     0.0090818885   c1785      1.445187344
    X20       c1814     1.1490087243   c1866      1.150495574
    X20       c1869     1.4566909767   c1872              6.6
    X20       c1886     1.9841532932   c1895     0.5331700094
    X20       c1896     1.5702518685
    X21       obj                175   G21                 11
    X21       c12                  1   c35                  1
    X21       c36                  1   c55                  1
    X21       c76                  1   c94                  2
    X21       c789      0.3673904415   c1037     1.2568551673
    X21       c1119     0.7493758712   c1432     1.0183856349
    X21       c1465     0.9034651199   c1564     0.0018812949
    X21       c1722     1.0995535E-4   c1731     3.2202871E-4
    X21       c1759     0.5195719363   c1764     0.0064030627
    X21       c1785     1.1013898697   c1814     0.8208937722
    X21       c1866     0.7658991404   c1869     0.8099487025
    X21       c1872              6.6   c1878     0.1671567868
    X21       c1886     1.1341997211   c1895     0.3797268617
    X21       c1896     0.8208284473   c1913     0.7971014492
    X22       obj                191   G22                 19
    X22       c12                  1   c35                  1
    X22       c36                  1   c42                  1
    X22       c55                  2   c94                  2
    X22       c106                 1   c1037     1.9010777299
    X22       c1119     0.7781669424   c1398     0.4716125521
    X22       c1432     1.8189682464   c1465     1.3079063772
    X22       c1564     1.4613059427   c1722     0.3061300292
    X22       c1731     0.0119527075   c1763              8.5
    X22       c1764     0.6330681788   c1785      1.445187344
    X22       c1814     1.1490087243   c1866      1.150495574
    X22       c1869     1.4567269158   c1872              6.6
    X22       c1886     1.9841532932   c1895     0.5331700094
    X22       c1896     1.5702518685   c1907     1.0046367852
    X23       obj                243   G23                  4
    X23       c35                  1   c36                  1
    X23       c55                  1   c94                  2
    X23       c1037     1.2568551673   c1119     0.4654627382
    X23       c1432     0.9094841232   c1465     0.7708068368
    X23       c1564     0.0015922765   c1722     3.7937167E-5
    X23       c1731     1.9063357E-4   c1764     0.0050658234
    X23       c1785     0.8004872451   c1814     0.6476570441
    X23       c1866     0.5932672596   c1869     0.7567764420
    X23       c1872              6.6   c1886     1.1341997211
    X23       c1895     0.3573778032   c1896     0.7851259342
    X24       obj                162   G24                 19
    X24       c12                  1   c35                  1
    X24       c36                  1   c40                  1
    X24       c55                  2   c71                  1
    X24       c102                 9   c1037     1.9010777299
    X24       c1119     0.7781669424   c1179     1.1370977491
    X24       c1186     0.3066420021   c1432     1.8189682464
    X24       c1449     0.2258348735   c1465     1.3072107915
    X24       c1468     0.3261792658   c1564     0.0044221819
    X24       c1722     1.4968911E-4   c1731     2.3798890E-4
    X24       c1764     0.0094536638   c1771     0.7394975876
    X24       c1785     1.4167734041   c1814     1.1485968104
    X24       c1853     0.1495693106   c1862     0.6951843146
    X24       c1866     1.1504397929   c1869     1.4313045479
    X24       c1872              6.6   c1886     1.9833072882
    X24       c1895     0.5330662140   c1896     1.5702518685
    X24       c1908     0.0647771910
    X25       obj                251   G25                 13
    X25       c12                  1   c35                  1
    X25       c36                  1   c55                  1
    X25       c94                  2   c1037     1.2568551673
    X25       c1119     0.7493758712   c1432     1.0183856349
    X25       c1465     0.9034651199   c1564     0.0017515684
    X25       c1722     4.2745323E-5   c1731     1.9938477E-4
    X25       c1764     0.0063128998   c1785     1.1013898697
    X25       c1814     0.8208937722   c1866     0.7658991404
    X25       c1869     0.8099288834   c1872              6.6
    X25       c1886     1.1341997211   c1895     0.3797268617
    X25       c1896     0.8208284473
    X26       obj                248   G26                 19
    X26       c3                   1   c12                  1
    X26       c35                  1   c36                  1
    X26       c55                  2   c81                  3
    X26       c94                  2   c105                10
    X26       c465      0.6708004509   c1037     1.9010777299
    X26       c1119     0.7781669424   c1360     0.5317247542
    X26       c1432     1.8189682464   c1465     1.3079063772
    X26       c1564     0.0749976996   c1629     0.5968331303
    X26       c1691     0.1274325006   c1722     0.0030498619
    X26       c1731     0.1421362451   c1764     0.0764756711
    X26       c1768     1.5596330275   c1785      1.445187344
    X26       c1797     0.4576630937   c1814     1.1490087243
    X26       c1861     0.4007350613   c1866      1.150495574
    X26       c1869     1.4567810859   c1872              6.6
    X26       c1883     0.6277635365   c1886     1.9841532932
    X26       c1895     0.5331700094   c1896     1.5702518685
    X26       c1902     4.2857142857
    X27       obj                213   G27                  9
    X27       c12                  1   c35                  1
    X27       c36                  1   c55                  1
    X27       c94                  2   c1037     1.2568551673
    X27       c1119     0.7493758712   c1432     1.0183856349
    X27       c1465     0.9034651199   c1564     0.0017515684
    X27       c1722     4.2745323E-5   c1731     1.9938477E-4
    X27       c1764     0.0063128998   c1785     1.1013898697
    X27       c1814     0.8208937722   c1866     0.7658991404
    X27       c1869     0.8099288834   c1872              6.6
    X27       c1886     1.1341997211   c1895     0.3797268617
    X27       c1896     0.8208284473
    X28       obj                123   G28                  7
    X28       c12                  1   c35                  1
    X28       c55                  1   c94                  2
    X28       c1037     1.2568551673   c1119     0.7493758712
    X28       c1432     1.0183856349   c1465     0.9034651199
    X28       c1564     0.0017515684   c1722     4.2745323E-5
    X28       c1731     1.9938477E-4   c1764     0.0063128998
    X28       c1785     1.1013898697   c1814     0.8208937722
    X28       c1866     0.7658991404   c1869     0.8099288834
    X28       c1872              6.6   c1886     1.1341997211
    X28       c1895     0.3797268617   c1896     0.8208284473
    X29       obj                 65   G29                 18
    X29       c12                  1   c35                  1
    X29       c36                  1   c55                  1
    X29       c94                  2   c1037     1.2568551673
    X29       c1119     0.7563503700   c1432     1.4760851645
    X29       c1465     0.9118737391   c1564     0.0021548845
    X29       c1722     4.3050090E-5   c1731     2.0577916E-4
    X29       c1764     0.0072393132   c1785     1.2590974207
    X29       c1814     0.8256003922   c1866     1.2031801534
    X29       c1869     1.2689640347   c1872              6.6
    X29       c1886     1.1616448111   c1895     0.3832610087
    X29       c1896     1.2742528585
    X30       obj                 73   G30                 14
    X30       c12                  1   c35                  1
    X30       c36                  1   c55                  1
    X30       c94                  2   c1037     1.5103385624
    X30       c1119     0.9845721957   c1432     1.1537747944
    X30       c1465     1.1173143843   c1564     0.0019385972
    X30       c1722     5.0496219E-5   c1731     2.0038424E-4
    X30       c1764     0.0080265470   c1785     1.3299742379
    X30       c1814     1.0287279591   c1866     0.8128923620
    X30       c1869     0.9043414598   c1872              6.6
    X30       c1886     1.2943542113   c1895     0.4989065225
    X30       c1896     1.0606771027
    X31       obj                246   G31                 19
    X31       c12                  1   c29                  1
    X31       c35                  1   c36                  1
    X31       c55                  2   c94                  2
    X31       c789      0.7401212267   c1037     1.9010777299
    X31       c1119     0.7781669424   c1432     1.8189682464
    X31       c1465     1.3079063772   c1564     0.0030304057
    X31       c1722     6.0664070E-4   c1731     4.0758157E-4
    X31       c1759     1.2075065909   c1764     0.0091685730
    X31       c1785      1.445187344   c1814     1.1490087243
    X31       c1866      1.150495574   c1869       1.45671561
    X31       c1872              6.6   c1878     0.6964866119
    X31       c1886     1.9841532932   c1895     0.5331700094
    X31       c1896     1.5702518685   c1913     0.7246376811
    X32       obj                181   G32                 19
    X32       c11                  1   c12                  1
    X32       c32                  1   c35                  1
    X32       c36                  1   c55                  2
    X32       c88                  1   c94                  2
    X32       c1037     2.2131311519   c1119     0.7947313770
    X32       c1432     1.8189682464   c1465     1.3149055148
    X32       c1564     0.0828201551   c1662     0.6442616092
    X32       c1722     0.8207184257   c1731     0.0193341214
    X32       c1764     0.0904694296   c1785      1.445207993
    X32       c1797     0.0139481667   c1814     1.1571811381
    X32       c1861     0.0297912573   c1866     1.1570059495
    X32       c1869     1.4697722364   c1872              6.6
    X32       c1886     1.9926659839   c1895     0.6089442132
    X32       c1896     1.5702518685
    X33       obj                132   G33                 19
    X33       c12                  1   c35                  1
    X33       c36                  1   c51                  1
    X33       c55                  2   c94                  2
    X33       c97                  1   c1037     2.2131311519
    X33       c1119     1.4981138311   c1432     2.2402496859
    X33       c1465     2.1758912257   c1564     0.0703366529
    X33       c1722     5.0212174E-4   c1731     5.3929645E-4
    X33       c1764     0.0422445038   c1785     2.2104208436
    X33       c1814     1.7024958971   c1866     2.5324969298
    X33       c1869     2.7124449563   c1871      0.796812749
    X33       c1872              6.6   c1886      2.268993064
    X33       c1895     0.8979844945   c1896      2.707320912
    X34       obj                 91   G34                 11
    X34       c1                   1   c12                  1
    X34       c26                  6   c55                  1
    X34       c1037     1.5103385624   c1119      1.339981956
    X34       c1432     1.8683771685   c1465     1.6155136627
    X34       c1564     0.0026630965   c1722     5.8553760E-5
    X34       c1731     1.5253866E-4   c1764     0.0112883064
    X34       c1785     1.8615069805   c1814     1.3431921932
    X34       c1866     1.4839133766   c1869     1.4831779231
    X34       c1871     1.3147410359   c1872             13.2
    X34       c1886     1.4073815387   c1895     0.6790012360
    X34       c1896     1.6129048683
    X35       obj                264   G35                  8
    X35       c12                  1   c35                  1
    X35       c36                  1   c55                  1
    X35       c94                  2   c1037     1.2568551673
    X35       c1119     0.7493758712   c1432     1.0183856349
    X35       c1465     0.9034651199   c1564     0.0017515684
    X35       c1722     4.2745323E-5   c1731     1.9938477E-4
    X35       c1764     0.0063128998   c1785     1.1013898697
    X35       c1814     0.8208937722   c1866     0.7658991404
    X35       c1869     0.8099288834   c1872              6.6
    X35       c1886     1.1341997211   c1895     0.3797268617
    X35       c1896     0.8208284473
    X36       obj                229   G36                  6
    X36       c19                  1   c24                  1
    X36       c58                  1   c1188      1.235813367
    X36       c1564     0.0582525952   c1722     8.6696081E-4
    X36       c1731     0.0879772871   c1764     0.0267609087
    X36       c1797     0.0650023251   c1861     0.1388355210
    X36       c1869     2.5735411E-6
    X37       obj                112   G37                 13
    X37       c18                  1   c19                  1
    X37       c24                  1   c58                  1
    X37       c1188      1.235813367   c1564     0.0582525952
    X37       c1722     8.6696081E-4   c1731     0.0880610742
    X37       c1764     0.0267609087   c1797     0.0650023251
    X37       c1861     0.1388355210   c1869     2.5735411E-6
    X38       obj                107   G38                 21
    X38       c18                  1   c19                  1
    X38       c24                  1   c58                  1
    X38       c1188      1.235813367   c1564     0.0582525952
    X38       c1722     8.6696081E-4   c1731     0.0880610742
    X38       c1764     0.0267609087   c1797     0.0650023251
    X38       c1861     0.1388355210   c1869     2.5735411E-6
    X39       obj                193   G39                 11
    X39       c18                  1   c19                  1
    X39       c24                  1   c58                  1
    X39       c76                  1   c789      0.3673904415
    X39       c1188      1.235813367   c1564     0.0583823217
    X39       c1722     9.3417083E-4   c1731     0.0881101915
    X39       c1759     0.5195719363   c1764     0.0269521317
    X39       c1797     0.0650023251   c1861     0.1388355210
    X39       c1869     2.2392655E-5   c1878     0.1671567868
    X39       c1913     0.7971014492
    X40       obj                214   G40                 20
    X40       c18                  1   c19                  1
    X40       c24                  1   c42                  1
    X40       c58                  1   c106                 1
    X40       c1188      1.235813367   c1398     0.4716125521
    X40       c1564     1.5176508573   c1722     0.3065342608
    X40       c1731     0.0997039374   c1763              8.5
    X40       c1764     0.6514740661   c1797     0.0650023251
    X40       c1861     0.1388355210   c1869     4.2471548E-5
    X40       c1907     1.0046367852
    X41       obj                120   G41                  4
    X41       c18                  1   c19                  1
    X41       c24                  1   c58                  1
    X41       c1188      1.235813367   c1564     0.0582525952
    X41       c1722     8.6696081E-4   c1731     0.0880610742
    X41       c1764     0.0267609087   c1797     0.0650023251
    X41       c1861     0.1388355210   c1869     2.5735411E-6
    X42       obj                154   G42                 24
    X42       c16                 19   c18                  1
    X42       c19                  1   c24                  1
    X42       c40                  1   c58                  1
    X42       c64                 19   c71                  1
    X42       c90                 19   c93                  9
    X42       c102                 9   c110                 9
    X42       c113                19   c1179     2.9276143264
    X42       c1186      2.323045471   c1188      1.235813367
    X42       c1449     2.0851487246   c1468     2.2773243288
    X42       c1564     0.0607858916   c1722     0.0011019965
    X42       c1731     0.0880610742   c1764     0.0279246906
    X42       c1771     2.4715493456   c1785     0.0033986843
    X42       c1797     0.0650023251   c1853     2.2406848042
    X42       c1861     0.1388355210   c1862     1.0885781244
    X42       c1869     0.1823185204   c1908     0.1488124660
    X43       obj                150   G43                 13
    X43       c18                  1   c19                  1
    X43       c24                  1   c58                  1
    X43       c1188      1.235813367   c1564     0.0582525952
    X43       c1722     8.6696081E-4   c1731     0.0880610742
    X43       c1764     0.0267609087   c1797     0.0650023251
    X43       c1861     0.1388355210   c1869     2.5735411E-6
    X44       obj                 94   G44                 20
    X44       c3                   1   c18                  1
    X44       c19                  1   c58                  1
    X44       c81                  3   c98                  3
    X44       c105                10   c465      2.7057497182
    X44       c1188     2.1185372005   c1360     0.7596067917
    X44       c1564     0.3117240086   c1629     1.7052375152
    X44       c1691     0.1274325006   c1722     0.0061074820
    X44       c1731     0.8185135947   c1764     0.3240072818
    X44       c1768     1.5596330275   c1797      1.902137986
    X44       c1861     1.9714245307   c1869     0.0032954067
    X44       c1883     1.1605712439   c1902     4.2857142857
    X45       obj                 74   G45                  9
    X45       c18                  1   c19                  1
    X45       c24                  1   c959      0.8055878226
    X45       c1188      1.235813367   c1230     0.9815489757
    X45       c1541     6.5909090909   c1564     0.0728522336
    X45       c1716     6.5909090909   c1722     0.0013630410
    X45       c1731     0.1129399016   c1764     0.0341448220
    X45       c1797     0.0806039926   c1813                7
    X45       c1861     0.1814088495   c1869     0.0129171647
    X45       c1897     1.2439029287   c1900     0.6547946453
    X46       obj                104   G46                  7
    X46       c18                  1   c24                  1
    X46       c58                  1   c1188      1.235813367
    X46       c1564     0.0582525952   c1722     8.6696081E-4
    X46       c1731     0.0880610742   c1764     0.0267609087
    X46       c1797     0.0650023251   c1861     0.1388355210
    X46       c1869     2.5735411E-6
    X47       obj                152   G47                 18
    X47       c18                  1   c19                  1
    X47       c24                  1   c58                  1
    X47       c1188      1.235813367   c1564     0.0582525952
    X47       c1722     8.6696081E-4   c1731     0.0880610742
    X47       c1764     0.0267609087   c1797     0.0650023251
    X47       c1861     0.1388355210   c1869     2.5735411E-6
    X48       obj                 94   G48                 14
    X48       c24                  1   c1188      1.235813367
    X48       c1564     0.0582525952   c1722     8.5537604E-4
    X48       c1731     0.0879772871   c1764     0.0267609087
    X48       c1797     0.0650023251   c1861     0.1388355210
    X48       c1869     2.5735411E-6
    X49       obj                258   G49                 22
    X49       c18                  1   c19                  1
    X49       c24                  1   c29                  1
    X49       c58                  1   c789      0.7401212267
    X49       c1188      1.235813367   c1564     0.0584412883
    X49       c1722     0.0010042043   c1731     0.0881556783
    X49       c1759     1.2075065909   c1764     0.0268475932
    X49       c1797     0.0650023251   c1861     0.1388355210
    X49       c1869     3.7633764E-5   c1878     0.6964866119
    X49       c1913     0.7246376811
    X50       obj                264   G50                 24
    X50       c11                  1   c18                  1
    X50       c19                  1   c24                  1
    X50       c32                  1   c58                  1
    X50       c88                  1   c1188      1.235813367
    X50       c1564     0.1390879818   c1662     0.6442616092
    X50       c1722     0.8215277286   c1731     0.1070846347
    X50       c1764     0.1084496853   c1797     0.0789504918
    X50       c1861     0.1686267783   c1869     2.6983561E-4
    X51       obj                 88   G51                 24
    X51       c18                  1   c19                  1
    X51       c24                  1   c51                  1
    X51       c52                  1   c58                  1
    X51       c61                 23   c97                  1
    X51       c1037     0.6241068439   c1119     1.4398937773
    X51       c1188      1.235813367   c1432     0.6719608434
    X51       c1465      1.735969697   c1564     0.1454183270
    X51       c1722     0.0010401119   c1731     0.0883620519
    X51       c1764     0.0711159994   c1785     1.5021517416
    X51       c1797     0.0650023251   c1814     1.0926170059
    X51       c1861     0.1388355210   c1866     1.5927418895
    X51       c1869     1.5220897309   c1886     0.5696795415
    X51       c1895     0.7296289701   c1896     1.3514213278
    X52       obj                262   G52                 11
    X52       c1                   1   c18                  1
    X52       c19                  1   c24                  1
    X52       c58                  1   c1037     0.5777670657
    X52       c1119     0.7280271006   c1188      1.235813367
    X52       c1432     0.9588930453   c1465     0.8894092428
    X52       c1564     0.0603697460   c1722     8.9919715E-4
    X52       c1731     0.0880887347   c1764     0.0336558062
    X52       c1785     0.9904115550   c1797     0.0650023251
    X52       c1814     0.7331557907   c1861     0.1388355210
    X52       c1866     0.9036669323   c1869     0.7903225653
    X52       c1871     1.3147410359   c1872              6.6
    X52       c1886     0.5672609886   c1895     0.4059525955
    X52       c1896     0.8277789340
    X53       obj                220   G53                  8
    X53       c18                  1   c19                  1
    X53       c24                  1   c58                  1
    X53       c1188      1.235813367   c1564     0.0582525952
    X53       c1722     8.6696081E-4   c1731     0.0880610742
    X53       c1764     0.0267609087   c1797     0.0650023251
    X53       c1861     0.1388355210   c1869     2.5735411E-6
    X54       obj                190   G54                  6
    X54       c8                   1   c39                  1
    X54       c127                 3   c959      1.6594721223
    X54       c1230     1.1800038318   c1541     7.1818181818
    X54       c1564     0.0271184187   c1691     0.1274325006
    X54       c1716     7.1818181818   c1722     0.0033873722
    X54       c1731     0.0470377824   c1764     0.0145187155
    X54       c1797     0.0315478500   c1813                8
    X54       c1861     0.0673816234   c1869     0.0150629483
    X54       c1897     1.4439126229   c1900     1.3488454383
    X54       c1902     4.2857142857
    X55       obj                198   G55                 10
    X55       c8                   1   c39                  1
    X55       c127                 3   c959      1.6594721223
    X55       c1230     1.1800038318   c1541     7.1818181818
    X55       c1564     0.0271184187   c1691     0.1274325006
    X55       c1716     7.1818181818   c1722     0.0033873722
    X55       c1731     0.0470377824   c1764     0.0145187155
    X55       c1797     0.0315478500   c1813                8
    X55       c1861     0.0673816234   c1869     0.0150629483
    X55       c1897     1.4439126229   c1900     1.3488454383
    X55       c1902     15.714285714
    X56       obj                130   G56                 10
    X56       c8                   1   c39                  1
    X56       c127                 3   c959      1.6594721223
    X56       c1230     1.1800038318   c1541     7.1818181818
    X56       c1564     0.0271184187   c1691     0.1274325006
    X56       c1716     7.1818181818   c1722     0.0033873722
    X56       c1731     0.0470377824   c1764     0.0145187155
    X56       c1797     0.0315478500   c1813                8
    X56       c1861     0.0673816234   c1869     0.0150629483
    X56       c1897     1.4439126229   c1900     1.3488454383
    X56       c1902     4.2857142857
    X57       obj                118   G57                 10
    X57       c8                   1   c39                  1
    X57       c79                  6   c127                 3
    X57       c959      1.6594721223   c1230     1.1800038318
    X57       c1541     7.1818181818   c1564     0.0271184187
    X57       c1691     0.1274325006   c1716     7.1818181818
    X57       c1722     0.0033873722   c1731     0.0470377824
    X57       c1764     0.0145187155   c1797     0.0315478500
    X57       c1813                8   c1861     0.0673816234
    X57       c1869     0.0150629483   c1897     1.4439126229
    X57       c1900     1.3488454383   c1902     4.2857142857
    X58       obj                135   G58                 10
    X58       c8                   1   c39                  1
    X58       c42                  1   c106                 1
    X58       c127                 3   c959      1.6594721223
    X58       c1230     1.1800038318   c1398     0.4716125521
    X58       c1541     7.1818181818   c1564     1.4864331584
    X58       c1691     0.1274325006   c1716     7.1818181818
    X58       c1722     0.3095031867   c1731     0.0587641525
    X58       c1763              8.5   c1764     0.6396102878
    X58       c1797     0.0315478500   c1813                8
    X58       c1861     0.0673816234   c1869     0.0150887226
    X58       c1897     1.4439126229   c1900     1.3488454383
    X58       c1902     4.2857142857   c1907     1.0046367852
    X59       obj                 91   G59                  4
    X59       c8                   1   c25                  1
    X59       c127                 4   c959      1.8616018224
    X59       c1230     1.3859444363   c1541     8.7878787879
    X59       c1564     0.0302358604   c1691     0.1274325006
    X59       c1716     8.7878787879   c1722     0.0035009678
    X59       c1731     0.0525496926   c1764     0.0161991359
    X59       c1797     0.0349127022   c1813     9.3333333333
    X59       c1861     0.0745684587   c1869     0.0175935071
    X59       c1897     1.6871745722   c1900      1.513139686
    X59       c1902     5.7142857143
    X60       obj                243   G60                 10
    X60       c8                   1   c39                  1
    X60       c40                  1   c71                  1
    X60       c127                 3   c959      1.6594721223
    X60       c1179     1.1370977491   c1186     0.3066420021
    X60       c1230     1.1800038318   c1449     0.2258348735
    X60       c1468     0.3261792658   c1541     7.1818181818
    X60       c1564     0.0295493975   c1691     0.1274325006
    X60       c1716     7.1818181818   c1722     0.0035228465
    X60       c1731     0.0470494339   c1764     0.0159982073
    X60       c1771     0.7394975876   c1785     0.0033986843
    X60       c1797     0.0315478500   c1813                8
    X60       c1853     0.1495693106   c1861     0.0673816234
    X60       c1862     0.6951843146   c1869     0.1593874181
    X60       c1897     1.4439126229   c1900     1.3488454383
    X60       c1902     4.2857142857   c1908     0.0588246924
    X61       obj                258   G61                 10
    X61       c8                   1   c39                  1
    X61       c127                 3   c959      1.6594721223
    X61       c1230     1.1800038318   c1541     7.1818181818
    X61       c1564     0.0271184187   c1691     0.1274325006
    X61       c1716     7.1818181818   c1722     0.0033873722
    X61       c1731     0.0470377824   c1764     0.0145187155
    X61       c1797     0.0315478500   c1813                8
    X61       c1861     0.0673816234   c1869     0.0150629483
    X61       c1897     1.4439126229   c1900     1.3488454383
    X61       c1902     4.2857142857
    X62       obj                 98   G62                 10
    X62       c3                   1   c8                   1
    X62       c39                  1   c81                  3
    X62       c105                10   c127                 3
    X62       c465      0.6708004509   c959      1.6594721223
    X62       c1230     1.1800038318   c1360     0.5317247542
    X62       c1541     7.1818181818   c1564     0.0880886524
    X62       c1629     0.5968331303   c1691     0.1274325006
    X62       c1716     7.1818181818   c1722     0.0038279647
    X62       c1731     0.1723333096   c1764     0.0774573820
    X62       c1768     1.5596330275   c1797     0.4754935708
    X62       c1813                8   c1861     0.4388183696
    X62       c1869     0.0150663787   c1883     0.6277635365
    X62       c1897     1.4439126229   c1900     1.3488454383
    X62       c1902     5.7142857143
    X63       obj                 78   G63                  9
    X63       c25                  6   c39                  1
    X63       c79                  6   c127                 9
    X63       c959      1.5689566366   c1230     1.1603387712
    X63       c1541     7.1818181818   c1564     0.0159326653
    X63       c1716     7.1818181818   c1722     6.6171222E-4
    X63       c1731     0.0285261776   c1764     0.0089286299
    X63       c1797     0.0178304771   c1813                8
    X63       c1861     0.0380833082   c1869     0.0149030791
    X63       c1897     1.4335083156   c1900     1.2752730063
    X63       c1902               10
    X64       obj                188   G64                  7
    X64       c8                   1   c39                  1
    X64       c127                 3   c959      1.6594721223
    X64       c1230     1.1800038318   c1541     7.1818181818
    X64       c1564     0.0271184187   c1691     0.1274325006
    X64       c1716     7.1818181818   c1722     0.0033873722
    X64       c1731     0.0470377824   c1764     0.0145187155
    X64       c1797     0.0315478500   c1813                8
    X64       c1861     0.0673816234   c1869     0.0150629483
    X64       c1897     1.4439126229   c1900     1.3488454383
    X64       c1902     4.2857142857
    X65       obj                129   G65                 10
    X65       c8                   1   c39                  1
    X65       c127                 3   c959      1.6594721223
    X65       c1230     1.1800038318   c1541     7.1818181818
    X65       c1564     0.0271184187   c1691     0.1274325006
    X65       c1716     7.1818181818   c1722     0.0033873722
    X65       c1731     0.0470377824   c1764     0.0145187155
    X65       c1797     0.0315478500   c1813                8
    X65       c1861     0.0673816234   c1869     0.0150629483
    X65       c1897     1.4439126229   c1900     1.3488454383
    X65       c1902     4.2857142857
    X66       obj                162   G66                 10
    X66       c8                   1   c39                  1
    X66       c127                 3   c959      1.6594721223
    X66       c1230     1.1800038318   c1541     7.1818181818
    X66       c1564     0.0271184187   c1691     0.1274325006
    X66       c1716     7.1818181818   c1722     0.0033873722
    X66       c1731     0.0470377824   c1764     0.0145187155
    X66       c1797     0.0315478500   c1813                8
    X66       c1861     0.0673816234   c1869     0.0150629483
    X66       c1897     1.4439126229   c1900     1.3488454383
    X66       c1902     4.2857142857
    X67       obj                208   G67                 10
    X67       c8                   1   c39                  1
    X67       c127                 3   c959      1.6594721223
    X67       c1230     1.1800038318   c1541     7.1818181818
    X67       c1564     0.0271184187   c1691     0.1274325006
    X67       c1716     7.1818181818   c1722     0.0033873722
    X67       c1731     0.0470377824   c1764     0.0145187155
    X67       c1797     0.0315478500   c1813                8
    X67       c1861     0.0673816234   c1869     0.0150629483
    X67       c1897     1.4439126229   c1900     1.3488454383
    X67       c1902     4.2857142857
    X68       obj                110   G68                 10
    X68       c8                   1   c11                  1
    X68       c39                  1   c127                 3
    X68       c959      1.6594721223   c1230     1.1800038318
    X68       c1541     7.6363636364   c1564     0.0760648007
    X68       c1662     0.6442616092   c1691     0.1274325006
    X68       c1716     7.6363636364   c1722     0.8213573050
    X68       c1731     0.0487210955   c1764     0.0775991538
    X68       c1797     0.0454960167   c1813                8
    X68       c1861     0.0933362799   c1869     0.0150629483
    X68       c1897     1.4439126229   c1900     1.3488454383
    X68       c1902     5.7142857143
    X69       obj                186   G69                 10
    X69       c8                   1   c39                  1
    X69       c51                  1   c52                  1
    X69       c97                  1   c127                 3
    X69       c959      1.6594721223   c1037     0.6241068439
    X69       c1119     1.4398937773   c1230     1.1800038318
    X69       c1432     0.6719608434   c1465      1.735969697
    X69       c1541     7.1818181818   c1564     0.1142006280
    X69       c1691     0.1274325006   c1716     7.1818181818
    X69       c1722     0.0040090377   c1731     0.0474222669
    X69       c1764     0.0588354364   c1785     1.5021517416
    X69       c1797     0.0315478500   c1813                8
    X69       c1814     1.0926170059   c1861     0.0673816234
    X69       c1866     1.5927418895   c1869     1.5370957575
    X69       c1886     0.5696795415   c1895     0.7296289701
    X69       c1896     1.3514213278   c1897     1.4439126229
    X69       c1900     1.3488454383   c1902     4.2857142857
    X70       obj                262   G70                 10
    X70       c1                   1   c8                   1
    X70       c39                  1   c127                 3
    X70       c959      1.6594721223   c1037     0.5777670657
    X70       c1119     0.7280271006   c1230     1.1800038318
    X70       c1432     0.9588930453   c1465     0.8894092428
    X70       c1541     7.1818181818   c1564     0.0291520470
    X70       c1691     0.1274325006   c1716     7.1818181818
    X70       c1722     0.0034414323   c1731     0.0471489498
    X70       c1764     0.0213752433   c1785     0.9904115550
    X70       c1797     0.0315478500   c1813                8
    X70       c1814     0.7331557907   c1861     0.0673816234
    X70       c1866     0.9036669323   c1869     0.8048954653
    X70       c1871     1.3147410359   c1872              6.6
    X70       c1886     0.5672609886   c1895     0.4059525955
    X70       c1896     0.8277789340   c1897     1.4439126229
    X70       c1900     1.3488454383   c1902     4.2857142857
    X71       obj                223   G71                  8
    X71       c8                   1   c39                  1
    X71       c127                 3   c959      1.6594721223
    X71       c1230     1.1800038318   c1541     7.1818181818
    X71       c1564     0.0271184187   c1691     0.1274325006
    X71       c1716     7.1818181818   c1722     0.0033873722
    X71       c1731     0.0470377824   c1764     0.0145187155
    X71       c1797     0.0315478500   c1813                8
    X71       c1861     0.0673816234   c1869     0.0150629483
    X71       c1897     1.4439126229   c1900     1.3488454383
    X71       c1902     4.2857142857
    X72       obj                154   G72                  6
    X72       c4                   1   c73                  1
    X72       c87                  1   c89                  1
    X72       c789      0.6589374503   c1564     0.0010238290
    X72       c1722     5.4388521E-4   c1731     1.4676029E-4
    X72       c1759     1.5560725299   c1764     4.7034120E-4
    X72       c1869     3.8618419E-5   c1878     0.4875406283
    X72       c1913     0.4347826087
    X73       obj                217   G73                 13
    X73       c4                   1   c73                  1
    X73       c87                  1   c89                  1
    X73       c789      0.6589374503   c1564     0.0010238290
    X73       c1722     5.4388521E-4   c1731     1.4676029E-4
    X73       c1759     1.5560725299   c1764     4.7034120E-4
    X73       c1869     3.8618419E-5   c1878     0.4875406283
    X73       c1913     0.4347826087
    X74       obj                156   G74                 21
    X74       c4                   1   c73                  1
    X74       c87                  2   c89                  1
    X74       c789      0.6589374503   c1564     0.0010242980
    X74       c1722     5.5414339E-4   c1731     1.4676029E-4
    X74       c1759     1.5560725299   c1764     4.7055667E-4
    X74       c1869     5.3040111E-5   c1878     0.9332920600
    X74       c1913     0.4347826087
    X75       obj                 91   G75                 11
    X75       c4                   1   c76                  1
    X75       c84                  5   c87                  1
    X75       c789      1.1178640799   c1564     1.2972648E-4
    X75       c1722     1.7733674E-4   c1731     1.2264394E-4
    X75       c1759     0.9910802463   c1764     2.7358265E-4
    X75       c1869     4.6560489E-5   c1878     0.7661352731
    X75       c1913     0.7971014492
    X76       obj                233   G76                 20
    X76       c4                   1   c42                  1
    X76       c73                  1   c87                  2
    X76       c89                  1   c106                 1
    X76       c789      0.6589374503   c1398     0.4716125521
    X76       c1564     1.4602346374   c1722     0.3061850899
    X76       c1731     0.0117961151   c1759     1.5560725299
    X76       c1763              8.5   c1764     0.6252553432
    X76       c1869     7.8814364E-5   c1878     0.9332920600
    X76       c1907     1.0046367852   c1913     0.4347826087
    X77       obj                191   G77                  4
    X77       c87                  1   c89                  1
    X77       c789      0.6332967660   c1564     0.0010233980
    X77       c1722     9.6432789E-5   c1731     1.4639062E-4
    X77       c1759     0.7235599950   c1764     4.7014319E-4
    X77       c1869     2.4355680E-5   c1878     0.4457514316
    X77       c1913     0.4347826087
    X78       obj                172   G78                 27
    X78       c4                   1   c40                  1
    X78       c64                 19   c71                  1
    X78       c73                  1   c87                  3
    X78       c89                  1   c93                  9
    X78       c102                 9   c110                 9
    X78       c113                19   c789      0.6803046873
    X78       c1179     2.9276143264   c1186     3.0513202261
    X78       c1449     2.6215065494   c1468     1.6012436687
    X78       c1564     0.0036871002   c1722     7.9172485E-4
    X78       c1731     1.4706836E-4   c1759     1.6208417554
    X78       c1764     0.0016938327   c1771     2.6243758292
    X78       c1785     0.0033986843   c1853     2.5824021637
    X78       c1862     2.3150350003   c1869      0.182341313
    X78       c1878     1.3790434917   c1908     0.1288540882
    X78       c1913     0.4347826087
    X79       obj                157   G79                 13
    X79       c4                   1   c73                  1
    X79       c87                  1   c789      1.0551868515
    X79       c1564     8.4816865E-4   c1722     5.9724075E-4
    X79       c1731     8.0614324E-5   c1759     0.8972817603
    X79       c1764     3.8964382E-4   c1869     4.6560489E-5
    X79       c1878     0.4875406283   c1913     0.5072463768
    X80       obj                202   G80                 20
    X80       c3                   1   c4                   1
    X80       c73                  1   c81                  3
    X80       c87                  2   c89                  1
    X80       c105                10   c465      0.6708004509
    X80       c789      0.6589374503   c1360     0.5317247542
    X80       c1564     0.0731793850   c1629     0.5968331303
    X80       c1691     0.1274325006   c1722     0.0035380362
    X80       c1731     0.1419771469   c1759     1.5560725299
    X80       c1764     0.0686610940   c1768     1.5596330275
    X80       c1797     0.4576630937   c1861     0.4007350613
    X80       c1869     0.0033005669   c1878     0.9332920600
    X80       c1883     0.6277635365   c1902     4.2857142857
    X80       c1913     0.4347826087
    X81       obj                212   G81                  9
    X81       c4                   1   c73                  1
    X81       c87                  1   c89                  1
    X81       c789      0.6589374503   c1564     0.0010238290
    X81       c1722     5.4388521E-4   c1731     1.4676029E-4
    X81       c1759     1.5560725299   c1764     4.7034120E-4
    X81       c1869     3.8618419E-5   c1878     0.4875406283
    X81       c1913     0.4347826087
    X82       obj                169   G82                  7
    X82       c4                   1   c73                  1
    X82       c87                  1   c89                  1
    X82       c789      0.6589374503   c1564     0.0010238290
    X82       c1722     5.4388521E-4   c1731     1.4676029E-4
    X82       c1759     1.5560725299   c1764     4.7034120E-4
    X82       c1869     3.8618419E-5   c1878     0.4875406283
    X82       c1913     0.4347826087
    X83       obj                173   G83                 18
    X83       c4                   1   c73                  1
    X83       c87                  2   c89                  1
    X83       c789      0.6589374503   c1564     0.0010242980
    X83       c1722     5.5414339E-4   c1731     1.4676029E-4
    X83       c1759     1.5560725299   c1764     4.7055667E-4
    X83       c1869     5.3040111E-5   c1878     0.9332920600
    X83       c1913     0.4347826087
    X84       obj                150   G84                 14
    X84       c4                   1   c73                  1
    X84       c87                  2   c89                  1
    X84       c789      0.6589374503   c1564     0.0010242980
    X84       c1722     5.5414339E-4   c1731     1.4676029E-4
    X84       c1759     1.5560725299   c1764     4.7055667E-4
    X84       c1869     5.3040111E-5   c1878     0.9332920600
    X84       c1913     0.4347826087
    X85       obj                 96   G85                 22
    X85       c29                  1   c73                  1
    X85       c84                 16   c87                  2
    X85       c89                  1   c789      1.9252613273
    X85       c1564     0.0010250684   c1722     7.2923367E-4
    X85       c1731     2.4785606E-4   c1759      2.771676111
    X85       c1764     4.7091056E-4   c1869     7.5714399E-5
    X85       c1878     1.5322705464   c1913     1.5942028986
    X86       obj                210   G86                 27
    X86       c4                   1   c11                  1
    X86       c32                  1   c73                  1
    X86       c87                  3   c88                  1
    X86       c89                  1   c789      0.6589374503
    X86       c1564     0.0816717619   c1662     0.6442616092
    X86       c1722     0.8211967268   c1731     0.0191768124
    X86       c1733     0.8492569002   c1759     1.5560725299
    X86       c1764     0.1005607434   c1797     0.0139481667
    X86       c1861     0.0297912573   c1869     3.2394908E-4
    X86       c1878     1.3790434917   c1903     1.9284149014
    X86       c1913     0.4347826087
    X87       obj                194   G87                 27
    X87       c4                   1   c51                  1
    X87       c52                  1   c73                  1
    X87       c87                  3   c89                  1
    X87       c97                  1   c789      0.6589374503
    X87       c1037     0.6241068439   c1119     1.4398937773
    X87       c1432     0.6719608434   c1465      1.735969697
    X87       c1564     0.0880021071   c1722     7.3755268E-4
    X87       c1731     4.5422960E-4   c1759     1.5560725299
    X87       c1764     0.0447393166   c1785     1.5021517416
    X87       c1814     1.0926170059   c1866     1.5927418895
    X87       c1869     1.5221118711   c1878     1.2118867048
    X87       c1886     0.5696795415   c1895     0.7296289701
    X87       c1896     1.3514213278   c1913     0.4347826087
    X88       obj                106   G88                 11
    X88       c1                   1   c4                   1
    X88       c87                  1   c89                  1
    X88       c789      0.8473003426   c1037     0.5777670657
    X88       c1119     0.7280271006   c1432     1.8683771685
    X88       c1465     1.0062362559   c1564     0.0034443521
    X88       c1722     1.7735974E-4   c1731     2.4291909E-4
    X88       c1759     0.8210901973   c1764     0.0098207208
    X88       c1785     1.3314151188   c1814     0.9789650332
    X88       c1866       1.43468216   c1869     1.4561444345
    X88       c1871     1.3147410359   c1872              6.6
    X88       c1878     0.7661352731   c1886     0.6742048133
    X88       c1895     0.4059525955   c1896     1.6129048683
    X88       c1913     0.7971014492
    X89       obj                221   G89                  8
    X89       c4                   1   c73                  1
    X89       c87                  1   c89                  1
    X89       c789      0.6589374503   c1564     0.0010238290
    X89       c1722     5.4388521E-4   c1731     1.4676029E-4
    X89       c1759     1.5560725299   c1764     4.7034120E-4
    X89       c1869     3.8618419E-5   c1878     0.4875406283
    X89       c1913     0.4347826087
    X90       obj                141   G90                  6
    X90       c33                  1   c1722     8.1047516E-6
    X91       obj                149   G91                 13
    X91       c33                  1   c34                  1
    X91       c103                 1   c1722     5.4031677E-6
    X91       c1731     8.4655939E-6   c1764     1.9680303E-4
    X92       obj                234   G92                 21
    X92       c33                  1   c34                  1
    X92       c103                 1   c1722     5.4031677E-6
    X92       c1731     8.4655939E-6   c1764     1.9680303E-4
    X93       obj                230   G93                 11
    X93       c33                  1   c34                  1
    X93       c76                  1   c103                 1
    X93       c789      0.3673904415   c1564     1.2972648E-4
    X93       c1722     8.3387150E-5   c1731     1.3110953E-4
    X93       c1759     0.5195719363   c1764     3.8802601E-4
    X93       c1869     1.9819114E-5   c1878     0.1671567868
    X93       c1913     0.7971014492
    X94       obj                126   G94                 20
    X94       c33                  1   c34                  1
    X94       c42                  1   c103                 1
    X94       c106                 1   c1398     0.4716125521
    X94       c1564     1.4593982621   c1722     0.3061164106
    X94       c1731     0.0117351158   c1763              8.5
    X94       c1764     0.6250925834   c1869     3.9898007E-5
    X94       c1907     1.0046367852
    X95       obj                113   G95                  4
    X95       c33                  1   c1722     5.4031677E-6
    X96       obj                101   G96                 25
    X96       c33                  1   c34                  1
    X96       c40                  1   c71                  1
    X96       c93                  9   c1179     1.1370977491
    X96       c1186     2.0164034688   c1449     0.8141570704
    X96       c1468     0.5634005500   c1564     0.0025145012
    X96       c1722     1.7174878E-4   c1731     6.5348844E-5
    X96       c1764     0.0014984138   c1771     0.9071304781
    X96       c1785     0.0033986843   c1853     0.8803422982
    X96       c1862     0.6951843146   c1869     0.1822615730
    X96       c1908     0.0756317474
    X97       obj                240   G97                 13
    X97       c33                  1   c34                  1
    X97       c103                 1   c1722     5.4031677E-6
    X97       c1731     8.4655939E-6   c1764     1.9680303E-4
    X98       obj                138   G98                 20
    X98       c3                   1   c33                  1
    X98       c34                  1   c81                  3
    X98       c103                 1   c105                10
    X98       c465      0.6708004509   c1360     0.5317247542
    X98       c1564     0.0721559870   c1629     0.5968331303
    X98       c1691     0.1274325006   c1722     0.0029978609
    X98       c1731     0.1419155203   c1764     0.0685000757
    X98       c1768     1.5596330275   c1797     0.4576630937
    X98       c1861     0.4007350613   c1869     0.0032758501
    X98       c1883     0.6277635365   c1902     4.2857142857
    X99       obj                 87   G99                  9
    X99       c34                  1   c103                 1
    X99       c959      0.5838248827   c1230     1.3585453435
    X99       c1541     1.9545454545   c1564     0.0212545484
    X99       c1716     1.9545454545   c1722     2.5660652E-4
    X99       c1731     0.0348600117   c1764     0.0124337482
    X99       c1797     0.0257547115   c1861     0.0550083213
    X99       c1869     0.0043753571   c1897     0.5239351321
    X99       c1900     0.4745421867
    X100      obj                242   G100                 7
    X100      c33                  1   c34                  1
    X100      c103                 1   c1722     5.4031677E-6
    X100      c1731     8.4655939E-6   c1764     1.9680303E-4
    X101      obj                189   G101                18
    X101      c33                  1   c34                  1
    X101      c103                 1   c1722     5.4031677E-6
    X101      c1731     8.4655939E-6   c1764     1.9680303E-4
    X102      obj                 93   G102                14
    X103      obj                204   G103                22
    X103      c29                  1   c33                  1
    X103      c34                  1   c103                 1
    X103      c789      0.7401212267   c1564     1.8869307E-4
    X103      c1722     5.8635419E-4   c1731     1.8685678E-4
    X103      c1759     1.2075065909   c1764     2.8348755E-4
    X103      c1869     3.5060223E-5   c1878     0.6964866119
    X103      c1913     0.7246376811
    X104      obj                184   G104                25
    X104      c32                  1   c33                  1
    X104      c34                  1   c88                  1
    X104      c103                 1   c1564     0.1170812542
    X104      c1662     1.1504671594   c1722     0.7157376533
    X104      c1731     0.0073610684   c1764     0.1124505359
    X104      c1869     2.3924404E-4
    X105      obj                176   G105                25
    X105      c33                  1   c34                  1
    X105      c45                 23   c51                  1
    X105      c52                  1   c61                 23
    X105      c85                 23   c97                  1
    X105      c103                 1   c1037     0.6241068439
    X105      c1119     1.4398937773   c1432     0.6719608434
    X105      c1465      1.735969697   c1564     0.1061915094
    X105      c1722     7.5808363E-4   c1731     4.5705038E-4
    X105      c1764     0.0532922270   c1785     1.5021517416
    X105      c1814     1.0926170059   c1866     1.5927418895
    X105      c1869     1.5291835527   c1886     0.5696795415
    X105      c1895     0.7296289701   c1896     1.3514213278
    X105      c1908     0.0247796323
    X106      obj                148   G106                11
    X106      c1                   1   c33                  1
    X106      c34                  1   c103                 1
    X106      c1037     0.5777670657   c1119     0.7280271006
    X106      c1432     0.9588930453   c1465     0.8894092428
    X106      c1564     0.0021171507   c1722     5.4656343E-5
    X106      c1731     1.1991313E-4   c1764     0.0070917005
    X106      c1785     0.9904115550   c1814     0.7331557907
    X106      c1866     0.9036669323   c1869     0.7903199918
    X106      c1871     1.3147410359   c1872              6.6
    X106      c1886     0.5672609886   c1895     0.4059525955
    X106      c1896     0.8277789340
    X107      obj                140   G107                 8
    X107      c33                  1   c34                  1
    X107      c103                 1   c1722     5.4031677E-6
    X107      c1731     8.4655939E-6   c1764     1.9680303E-4
    X108      obj                131   G108                 6
    X108      c43                  1   c46                  2
    X108      c123                 6   c1360     0.2680965147
    X108      c1564     0.0017625764   c1629     0.1289675431
    X108      c1722     1.2582741E-5   c1731     4.2245560E-5
    X108      c1764     8.0971750E-4   c1869     6.7795853E-6
    X108      c1883     0.3165194301
    X109      obj                256   G109                10
    X109      c43                  1   c66                  1
    X109      c123                 4   c1360     0.6255585344
    X109      c1564     0.0015422543   c1629     0.3009242673
    X109      c1722     1.1009898E-5   c1731     9.8572974E-5
    X109      c1764     7.0850281E-4   c1869     8.6894672E-6
    X109      c1883     0.5222570597
    X110      obj                147   G110                10
    X110      c43                  1   c66                  1
    X110      c123                 4   c1360     0.6255585344
    X110      c1564     0.0015422543   c1629     0.3009242673
    X110      c1722     1.1009898E-5   c1731     9.8572974E-5
    X110      c1764     7.0850281E-4   c1869     8.6894672E-6
    X110      c1883     0.5222570597
    X111      obj                252   G111                10
    X111      c43                  1   c66                  1
    X111      c76                  1   c123                 4
    X111      c789      0.3673904415   c1360     0.6255585344
    X111      c1564     0.0016719808   c1629     0.3009242673
    X111      c1722     9.4397049E-5   c1731     1.4769034E-4
    X111      c1759     0.5195719363   c1764     8.9972579E-4
    X111      c1869     2.6162020E-5   c1878     0.1671567868
    X111      c1883     0.5222570597   c1913     0.7971014492
    X112      obj                107   G112                10
    X112      c42                  1   c43                  1
    X112      c66                  1   c123                 4
    X112      c1360     0.6255585344   c1398     0.4716125521
    X112      c1564     1.7841055353   c1629     0.3009242673
    X112      c1722     0.3085119091   c1731     0.0137199836
    X112      c1763             11.5   c1764     0.8315575339
    X112      c1869     4.5940064E-5   c1883     0.5222570597
    X112      c1907     1.2364760433
    X113      obj                112   G113                 4
    X113      c43                  1   c66                  1
    X113      c123                 4   c1360     0.6255585344
    X113      c1564     0.0015422543   c1629     0.3009242673
    X113      c1722     1.1009898E-5   c1731     9.8572974E-5
    X113      c1764     7.0850281E-4   c1869     8.6894672E-6
    X113      c1883     0.5222570597
    X114      obj                165   G114                10
    X114      c43                  1   c66                  1
    X114      c71                  1   c93                  9
    X114      c102                 9   c110                 9
    X114      c123                 4   c1179     0.7784623336
    X114      c1186     1.9676195139   c1360     0.6255585344
    X114      c1449     0.8141570704   c1468     0.5634005500
    X114      c1564     0.0015422543   c1629     0.3009242673
    X114      c1722     2.2544344E-4   c1731     9.8572974E-5
    X114      c1764     7.0850281E-4   c1771     0.5549307566
    X114      c1785     0.0033986843   c1853     0.7307729876
    X114      c1862     0.6951843146   c1869     0.1822702625
    X114      c1883     0.5222570597   c1908     0.0815842460
    X115      obj                255   G115                10
    X115      c43                  1   c66                  1
    X115      c123                 4   c1360     0.6255585344
    X115      c1564     0.0015422543   c1629     0.3009242673
    X115      c1722     1.1009898E-5   c1731     9.8572974E-5
    X115      c1764     7.0850281E-4   c1869     8.6894672E-6
    X115      c1883     0.5222570597
    X116      obj                 71   G116                10
    X116      c3                   1   c43                  1
    X116      c66                  1   c81                  3
    X116      c98                  3   c123                 4
    X116      c465      1.0766629087   c1360     0.9383378016
    X116      c1564     0.2430907587   c1629     0.9385971197
    X116      c1691     0.1274325006   c1722     0.0056068527
    X116      c1731     0.4210977135   c1764     0.1875510746
    X116      c1768     1.8348623853   c1797     1.5544646573
    X116      c1861     0.9950925265   c1869     0.0033002775
    X116      c1883     1.1078180056   c1902     4.2857142857
    X117      obj                244   G117                 9
    X117      c43                  1   c66                  1
    X117      c123                 4   c1360     0.6255585344
    X117      c1564     0.0015422543   c1629     0.3009242673
    X117      c1722     1.1009898E-5   c1731     9.8572974E-5
    X117      c1764     7.0850281E-4   c1869     8.6894672E-6
    X117      c1883     0.5222570597
    X118      obj                192   G118                 7
    X118      c43                  1   c66                  1
    X118      c123                 4   c1360     0.6255585344
    X118      c1564     0.0015422543   c1629     0.3009242673
    X118      c1722     1.1009898E-5   c1731     9.8572974E-5
    X118      c1764     7.0850281E-4   c1869     8.6894672E-6
    X118      c1883     0.5222570597
    X119      obj                168   G119                10
    X119      c43                  1   c66                  1
    X119      c123                 4   c1360     0.6255585344
    X119      c1564     0.0015422543   c1629     0.3009242673
    X119      c1722     1.1009898E-5   c1731     9.8572974E-5
    X119      c1764     7.0850281E-4   c1869     8.6894672E-6
    X119      c1883     0.5222570597
    X120      obj                250   G120                10
    X120      c43                  1   c66                  1
    X120      c123                 4   c1360     0.6255585344
    X120      c1564     0.0015422543   c1629     0.3009242673
    X120      c1722     1.1009898E-5   c1731     9.8572974E-5
    X120      c1764     7.0850281E-4   c1869     8.6894672E-6
    X120      c1883     0.5222570597
    X121      obj                132   G121                10
    X121      c43                  1   c66                  1
    X121      c123                 4   c789      0.5550909200
    X121      c1360     0.6255585344   c1564     0.0016130142
    X121      c1629     0.3009242673   c1722     8.4927696E-5
    X121      c1731     1.0657604E-4   c1759     0.5062517074
    X121      c1764     7.4100951E-4   c1869     2.1580461E-5
    X121      c1878     0.4178919671   c1883     0.7385453370
    X121      c1913     0.4347826087
    X122      obj                177   G122                10
    X122      c11                  1   c32                  1
    X122      c43                  1   c66                  1
    X122      c88                  1   c123                 4
    X122      c1360     0.6255585344   c1564     0.0823776409
    X122      c1629     0.3009242673   c1662     0.6442616092
    X122      c1722     0.8206607678   c1731     0.0191125208
    X122      c1764     0.0823972794   c1797     0.0139481667
    X122      c1861     0.0297912573   c1869     2.6728715E-4
    X122      c1883     0.5222570597
    X123      obj                195   G123                10
    X123      c43                  1   c51                  1
    X123      c52                  1   c66                  1
    X123      c97                  1   c123                 4
    X123      c1037     0.6241068439   c1119     1.4398937773
    X123      c1360     0.6255585344   c1432     0.6719608434
    X123      c1465      1.735969697   c1564     0.0887079861
    X123      c1629     0.3009242673   c1722     6.3327165E-4
    X123      c1731     3.8993806E-4   c1764     0.0450635934
    X123      c1785     1.5021517416   c1814     1.0926170059
    X123      c1866     1.5927418895   c1869     1.5220871825
    X123      c1883     0.5222570597   c1886     0.5696795415
    X123      c1895     0.7296289701   c1896     1.3514213278
    X124      obj                 98   G124                10
    X124      c43                  1   c66                  1
    X124      c70                  4   c123                 4
    X124      c1037     0.6865175283   c1119     0.9199321355
    X124      c1360     0.6255585344   c1432     0.9094841232
    X124      c1465     1.1090917508   c1564     0.0022075377
    X124      c1629     0.3009242673   c1722     4.0198665E-5
    X124      c1731     1.3342329E-4   c1764     0.0077496871
    X124      c1785     1.1387874269   c1814     0.8385578878
    X124      c1866     1.0182376119   c1869     0.9934129191
    X124      c1871     1.0956175299   c1872               11
    X124      c1883     0.7385453370   c1886     0.6468140764
    X124      c1895     0.4661518420   c1896     0.8996869643
    X125      obj                105   G125                 8
    X125      c46                  4   c66                  1
    X125      c70                  4   c123                 8
    X125      c1360     0.3574620196   c1564     8.8128820E-4
    X125      c1629     0.1719567242   c1722     6.2913708E-6
    X125      c1731     5.6327413E-5   c1764     4.0528509E-4
    X125      c1785     6.0788498E-7   c1814     1.8576096E-5
    X125      c1866     2.3087977E-5   c1869     6.0985234E-5
    X125      c1883     0.4220259068   c1886     0.0019982151
    X126      obj                211   G126                 6
    X126      c54                  1   c83                  2
    X126      c92                  1   c1179     0.3892311668
    X126      c1186     0.6267500096   c1449     0.5360733743
    X126      c1468     0.3600680207   c1564     5.1882294E-6
    X126      c1630               11   c1722     1.1945347E-4
    X126      c1731     6.0285478E-6   c1764     2.5699291E-5
    X126      c1771     0.3387315138   c1853     0.3729341749
    X126      c1862     0.3691242051   c1869     1.5952038E-4
    X126      c1908     0.0756317474
    X127      obj                 85   G127                13
    X127      c83                  2   c92                  1
    X127      c1179     0.7914987841   c1186     0.7433745507
    X127      c1449     0.5474784814   c1468     0.6566716459
    X127      c1564     5.4196084E-6   c1630               13
    X127      c1722     5.7514637E-5   c1731     7.0584178E-6
    X127      c1764     2.2730035E-5   c1771     0.7573985635
    X127      c1853     0.4407403885   c1862     0.3258778320
    X127      c1869     1.2339238E-4   c1908     0.0364152858
    X128      obj                124   G128                16
    X128      c54                  1   c83                  2
    X128      c92                  1   c1179     0.3892311668
    X128      c1186     0.6267500096   c1449     0.5360733743
    X128      c1468     0.3600680207   c1564     5.1882294E-6
    X128      c1630               11   c1722     1.1945347E-4
    X128      c1731     6.0285478E-6   c1764     2.5699291E-5
    X128      c1771     0.3387315138   c1853     0.3729341749
    X128      c1862     0.3691242051   c1869     1.5952038E-4
    X128      c1908     0.0756317474
    X129      obj                171   G129                11
    X129      c54                  1   c76                  1
    X129      c83                  2   c92                  1
    X129      c789      0.3673904415   c1179     0.3892311668
    X129      c1186     0.6267500096   c1449     0.5360733743
    X129      c1468     0.3600680207   c1564     1.3491471E-4
    X129      c1630               11   c1722     1.8666350E-4
    X129      c1731     1.2652166E-4   c1759     0.5195719363
    X129      c1764     2.1692227E-4   c1771     0.3387315138
    X129      c1853     0.3729341749   c1862     0.3691242051
    X129      c1869     1.7699293E-4   c1878     0.1671567868
    X129      c1908     0.0756317474   c1913     0.7971014492
    X130      obj                139   G130                16
    X130      c42                  1   c54                  1
    X130      c83                  2   c92                  1
    X130      c106                 1   c1179     0.3892311668
    X130      c1186     0.6267500096   c1398     0.4716125521
    X130      c1449     0.5360733743   c1468     0.3600680207
    X130      c1564     1.4594034503   c1630               11
    X130      c1722     0.3061595565   c1731     0.0117305279
    X130      c1763              8.5   c1764     0.6251157140
    X130      c1771     0.3387315138   c1853     0.3729341749
    X130      c1862     0.3691242051   c1869     1.8529463E-4
    X130      c1907     1.0046367852   c1908     0.0756317474
    X131      obj                115   G131                 4
    X131      c54                  1   c83                  2
    X131      c92                  1   c1179     0.3892311668
    X131      c1186     0.6267500096   c1449     0.5360733743
    X131      c1468     0.3600680207   c1564     5.1882294E-6
    X131      c1630               11   c1722     1.1945347E-4
    X131      c1731     6.0285478E-6   c1764     2.5699291E-5
    X131      c1771     0.3387315138   c1853     0.3729341749
    X131      c1862     0.3691242051   c1869     1.5952038E-4
    X131      c1908     0.0756317474
    X132      obj                 65   G132                16
    X132      c16                 11   c54                  1
    X132      c64                  8   c71                  1
    X132      c83                  2   c92                  1
    X132      c1179     0.9423491407   c1186     0.8540510742
    X132      c1449     0.6289892285   c1468     0.4278455305
    X132      c1564     5.1882294E-6   c1630               11
    X132      c1722     1.1945347E-4   c1731     4.6043754E-6
    X132      c1764     2.5699291E-5   c1771     0.6854394026
    X132      c1853     0.5101937588   c1862     1.3488147861
    X132      c1869     1.4210909E-4   c1908     0.0756317474
    X133      obj                253   G133                13
    X133      c54                  1   c83                  2
    X133      c92                  1   c1179     0.3892311668
    X133      c1186     0.6267500096   c1449     0.5360733743
    X133      c1468     0.3600680207   c1564     5.1882294E-6
    X133      c1630               11   c1722     1.1945347E-4
    X133      c1731     6.0285478E-6   c1764     2.5699291E-5
    X133      c1771     0.3387315138   c1853     0.3729341749
    X133      c1862     0.3691242051   c1869     1.5952038E-4
    X133      c1908     0.0756317474
    X134      obj                217   G134                16
    X134      c3                   1   c54                  1
    X134      c81                  3   c83                  2
    X134      c92                  1   c105                10
    X134      c465      0.6708004509   c1179     0.3892311668
    X134      c1186     0.6267500096   c1360     0.5317247542
    X134      c1449     0.5360733743   c1468     0.3600680207
    X134      c1564     0.0721583561   c1629     0.5968331303
    X134      c1630               11   c1691     0.1274325006
    X134      c1722     0.0030850847   c1731     0.1419109230
    X134      c1764     0.0685155955   c1768     1.5596330275
    X134      c1771     0.3387315138   c1797     0.4576630937
    X134      c1853     0.3729341749   c1861     0.4007350613
    X134      c1862     0.3691242051   c1869     0.0033802590
    X134      c1883     0.6277635365   c1902     4.2857142857
    X134      c1908     0.0756317474
    X135      obj                178   G135                 9
    X135      c54                  1   c83                  2
    X135      c92                  1   c1179     0.3892311668
    X135      c1186     0.6267500096   c1449     0.5360733743
    X135      c1468     0.3600680207   c1564     5.1882294E-6
    X135      c1630               11   c1722     1.1945347E-4
    X135      c1731     6.0285478E-6   c1764     2.5699291E-5
    X135      c1771     0.3387315138   c1853     0.3729341749
    X135      c1862     0.3691242051   c1869     1.5952038E-4
    X135      c1908     0.0756317474
    X136      obj                186   G136                 7
    X136      c54                  1   c83                  2
    X136      c92                  1   c1179     0.3892311668
    X136      c1186     0.6267500096   c1449     0.5360733743
    X136      c1468     0.3600680207   c1564     5.1882294E-6
    X136      c1630               11   c1722     1.1945347E-4
    X136      c1731     6.0285478E-6   c1764     2.5699291E-5
    X136      c1771     0.3387315138   c1853     0.3729341749
    X136      c1862     0.3691242051   c1869     1.5952038E-4
    X136      c1908     0.0756317474
    X137      obj                 87   G137                16
    X137      c54                  1   c83                  2
    X137      c92                  1   c1179     0.3892311668
    X137      c1186     0.6267500096   c1449     0.5360733743
    X137      c1468     0.3600680207   c1564     5.1882294E-6
    X137      c1630               11   c1722     1.1945347E-4
    X137      c1731     6.0285478E-6   c1764     2.5699291E-5
    X137      c1771     0.3387315138   c1853     0.3729341749
    X137      c1862     0.3691242051   c1869     1.5952038E-4
    X137      c1908     0.0756317474
    X138      obj                119   G138                14
    X138      c54                  1   c1179     1.0173389644
    X138      c1186     1.0033444575   c1449     0.8685214091
    X138      c1468     0.6706892672   c1564     5.5352979E-6
    X138      c1630               14   c1722     6.1938840E-5
    X138      c1731     7.2090901E-6   c1764     3.0529571E-5
    X138      c1771     0.7658804865   c1853      0.599455477
    X138      c1862     0.4443267817   c1869     1.3288410E-4
    X138      c1908     0.0392164616
    X139      obj                137   G139                16
    X139      c29                  1   c54                  1
    X139      c83                  2   c92                  1
    X139      c789      0.7401212267   c1179     0.3892311668
    X139      c1186     0.6267500096   c1449     0.5360733743
    X139      c1468     0.3600680207   c1564     1.9388130E-4
    X139      c1630               11   c1722     6.2950008E-4
    X139      c1731     1.8226891E-4   c1759     1.2075065909
    X139      c1764     2.0472725E-4   c1771     0.3387315138
    X139      c1853     0.3729341749   c1862     0.3691242051
    X139      c1869     1.8415360E-4   c1878     0.6964866119
    X139      c1908     0.0756317474   c1913     0.7246376811
    X140      obj                 82   G140                16
    X140      c11                  1   c32                  1
    X140      c54                  1   c92                  1
    X140      c107                 8   c1179     0.3892311668
    X140      c1186     0.6267500096   c1449     0.5360733743
    X140      c1468     0.3261792658   c1564     0.1021727014
    X140      c1630               11   c1662     0.6442616092
    X140      c1722     0.8207533948   c1731     0.0191824184
    X140      c1733     0.8492569002   c1764     0.1004144662
    X140      c1771     0.3338820853   c1797     0.0139481667
    X140      c1853     0.3729341749   c1861     0.0297912573
    X140      c1862     0.3691242051   c1869     3.7142454E-4
    X140      c1903     1.4609203798   c1908     0.0756317474
    X141      obj                208   G141                16
    X141      c51                  1   c52                  1
    X141      c54                  1   c83                  2
    X141      c92                  1   c97                  1
    X141      c1037     0.6241068439   c1119     1.4398937773
    X141      c1179     0.3892311668   c1186     0.6267500096
    X141      c1432     0.6719608434   c1449     0.5360733743
    X141      c1465      1.735969697   c1468     0.3600680207
    X141      c1564     0.0871709200   c1630               11
    X141      c1722     6.6540764E-4   c1731     3.8864245E-4
    X141      c1764     0.0443807899   c1771     0.3387315138
    X141      c1785     1.5021517416   c1814     1.0926170059
    X141      c1853     0.3729341749   c1862     0.3691242051
    X141      c1866     1.5927418895   c1869     1.5221923295
    X141      c1886     0.5696795415   c1895     0.7296289701
    X141      c1896     1.3514213278   c1908     0.0756317474
    X142      obj                205   G142                11
    X142      c1                   1   c54                  1
    X142      c83                  2   c92                  1
    X142      c1037     0.5777670657   c1119     0.7280271006
    X142      c1179     0.3892311668   c1186     0.6267500096
    X142      c1432     0.9588930453   c1449     0.5360733743
    X142      c1465     0.8894092428   c1468     0.3600680207
    X142      c1564     0.0021223389   c1630               11
    X142      c1722     1.5168982E-4   c1731     1.1532526E-4
    X142      c1764     0.0069205967   c1771     0.3387315138
    X142      c1785     0.9904115550   c1814     0.7331557907
    X142      c1853     0.3729341749   c1862     0.3691242051
    X142      c1866     0.9036669323   c1869     0.7904244007
    X142      c1871     1.3147410359   c1872              6.6
    X142      c1886     0.5672609886   c1895     0.4059525955
    X142      c1896     0.8277789340   c1908     0.0756317474
    X143      obj                223   G143                 8
    X143      c54                  1   c83                  2
    X143      c92                  1   c1179     0.3892311668
    X143      c1186     0.6267500096   c1449     0.5360733743
    X143      c1468     0.3600680207   c1564     5.1882294E-6
    X143      c1630               11   c1722     1.1945347E-4
    X143      c1731     6.0285478E-6   c1764     2.5699291E-5
    X143      c1771     0.3387315138   c1853     0.3729341749
    X143      c1862     0.3691242051   c1869     1.5952038E-4
    X143      c1908     0.0756317474
    X144      obj                147   G144                 6
    X144      c27                  1   c69                  1
    X144      c111                 4   c147                 7
    X144      c1360     0.4431039618   c1564     0.0043697206
    X144      c1629     0.3410475030   c1722     5.3614712E-5
    X144      c1731     6.9822523E-5   c1764     0.0060286604
    X144      c1869     2.3674576E-6   c1883     0.5706141949
    X145      obj                149   G145                13
    X145      c27                  1   c37                  6
    X145      c112                 3   c147                13
    X145      c1360     0.4431039618   c1564     0.0060381594
    X145      c1629     0.3410475030   c1722     4.3105422E-5
    X145      c1731     7.5419134E-5   c1764     0.0068502553
    X145      c1869     2.6371241E-6   c1883     0.8396557105
    X146      obj                214   G146                17
    X146      c27                  1   c69                  1
    X146      c111                 4   c147                 7
    X146      c1360     0.4431039618   c1564     0.0043697206
    X146      c1629     0.3410475030   c1722     5.3614712E-5
    X146      c1731     6.9822523E-5   c1764     0.0060286604
    X146      c1869     2.3674576E-6   c1883     0.5706141949
    X147      obj                105   G147                11
    X147      c37                  4   c69                  1
    X147      c76                  1   c78                  4
    X147      c111                 4   c112                 3
    X147      c147                11   c789      0.3673904415
    X147      c1360     0.5317247542   c1564     0.0031885309
    X147      c1629     0.5968331303   c1722     1.0522345E-4
    X147      c1731     1.3290439E-4   c1759     0.5195719363
    X147      c1764     0.0015964202   c1869     2.0313502E-5
    X147      c1878     0.7661352731   c1883     0.6277635365
    X147      c1913     0.7971014492
    X148      obj                132   G148                17
    X148      c27                  1   c69                  1
    X148      c106                 1   c111                 4
    X148      c147                 7   c1360     0.9748287161
    X148      c1398     0.6167241066   c1564     0.7519124000
    X148      c1629     0.8526187576   c1722     0.3982367106
    X148      c1731     0.0094086244   c1763               17
    X148      c1764     0.8528256956   c1869     4.1099169E-5
    X148      c1883     1.1508998169   c1907     0.3091190108
    X149      obj                131   G149                 4
    X149      c69                  1   c111                 4
    X149      c147                 7   c1564     0.0019465119
    X149      c1722     3.8013423E-5   c1731     6.5293795E-6
    X149      c1764     9.5852737E-4   c1869     3.1461080E-7
    X149      c1883     0.3675142272
    X150      obj                202   G150                17
    X150      c27                  1   c40                  1
    X150      c69                  1   c71                  1
    X150      c93                  9   c102                 9
    X150      c110                 9   c111                 4
    X150      c147                 7   c1179     1.1370977491
    X150      c1186     2.0164034688   c1360     0.4431039618
    X150      c1449     0.8141570704   c1468     0.5634005500
    X150      c1564     0.0068842219   c1629     0.3410475030
    X150      c1722     3.6642321E-4   c1731     1.3517136E-4
    X150      c1764     0.0075270743   c1771     0.9071304781
    X150      c1785     0.0033986843   c1853     0.8803422982
    X150      c1862     0.6951843146   c1869     0.1822639405
    X150      c1883     0.5706141949   c1908     0.0815842460
    X151      obj                213   G151                13
    X151      c27                  1   c69                  1
    X151      c111                 4   c147                 7
    X151      c1360     0.4431039618   c1564     0.0043697206
    X151      c1629     0.3410475030   c1722     5.3614712E-5
    X151      c1731     6.9822523E-5   c1764     0.0060286604
    X151      c1869     2.3674576E-6   c1883     0.5706141949
    X152      obj                 81   G152                17
    X152      c27                  1   c69                  1
    X152      c78                  4   c105                10
    X152      c111                 4   c112                 3
    X152      c147                 7   c465      1.6290868095
    X152      c1360     0.9748287161   c1564     0.1902217163
    X152      c1629     0.8526187576   c1722     0.0013686437
    X152      c1731     0.3095365803   c1764     0.1518011824
    X152      c1768     1.5596330275   c1797     0.6881170493
    X152      c1861     0.7435856242   c1869     1.4099952E-5
    X152      c1883     1.1508998169
    X153      obj                234   G153                 9
    X153      c27                  1   c69                  1
    X153      c111                 4   c147                 7
    X153      c1230     0.9155140633   c1360     0.4431039618
    X153      c1564     0.0160291482   c1629     0.3410475030
    X153      c1722     5.9342583E-4   c1731     0.0039534237
    X153      c1764     0.0073636989   c1813                7
    X153      c1869     0.0124076471   c1883     0.5706141949
    X153      c1897     0.3395550272
    X154      obj                226   G154                 7
    X154      c27                  1   c69                  1
    X154      c111                 4   c147                 7
    X154      c1360     0.4431039618   c1564     0.0043697206
    X154      c1629     0.3410475030   c1722     5.3614712E-5
    X154      c1731     6.9822523E-5   c1764     0.0060286604
    X154      c1869     2.3674576E-6   c1883     0.5706141949
    X155      obj                202   G155                17
    X155      c27                  1   c69                  1
    X155      c111                 4   c147                 7
    X155      c1360     0.4431039618   c1564     0.0043697206
    X155      c1629     0.3410475030   c1722     5.3614712E-5
    X155      c1731     6.9822523E-5   c1764     0.0060286604
    X155      c1869     2.3674576E-6   c1883     0.5706141949
    X156      obj                138   G156                14
    X156      c27                  1   c69                  1
    X156      c111                 4   c147                 7
    X156      c1360     0.4431039618   c1564     0.0043697206
    X156      c1629     0.5968331303   c1722     5.3614712E-5
    X156      c1731     6.9822523E-5   c1764     0.0060286604
    X156      c1869     2.3674576E-6   c1883     0.8818583012
    X157      obj                245   G157                17
    X157      c27                  1   c29                  1
    X157      c69                  1   c111                 4
    X157      c147                 7   c789      0.7401212267
    X157      c1360     0.4431039618   c1564     0.0045584137
    X157      c1629     0.3410475030   c1722     6.1754890E-4
    X157      c1731     2.4821371E-4   c1759     1.2075065909
    X157      c1764     0.0062092459   c1869     3.7427680E-5
    X157      c1878     0.6964866119   c1883     0.5706141949
    X157      c1913     0.7246376811
    X158      obj                148   G158                17
    X158      c11                  1   c27                  1
    X158      c32                  1   c69                  1
    X158      c147                 7   c1360     0.4431039618
    X158      c1564     0.0852051072   c1629     0.3410475030
    X158      c1662     0.6442616092   c1722     0.8207143825
    X158      c1731     0.0191771700   c1764     0.0836962012
    X158      c1797     0.0139481667   c1861     0.0297912573
    X158      c1869     2.6903618E-4   c1883     0.5706141949
    X159      obj                209   G159                17
    X159      c27                  1   c51                  1
    X159      c52                  1   c69                  1
    X159      c97                  1   c111                 4
    X159      c147                 7   c1037     0.6241068439
    X159      c1119     1.4398937773   c1360     0.9748287161
    X159      c1432     0.6719608434   c1465      1.735969697
    X159      c1564     0.0915354524   c1629     0.8526187576
    X159      c1722     6.5345647E-4   c1731     4.5458725E-4
    X159      c1764     0.0463625152   c1785     1.5021517416
    X159      c1814     1.0926170059   c1866     1.5927418895
    X159      c1869     1.5220895249   c1883     1.1508998169
    X159      c1886     0.5696795415   c1895     0.7296289701
    X159      c1896     1.3514213278
    X160      obj                177   G160                11
    X160      c1                   1   c27                  1
    X160      c69                  1   c111                 4
    X160      c147                 7   c1037     0.5777670657
    X160      c1119     0.7280271006   c1360     0.9748287161
    X160      c1432     0.9588930453   c1465     0.8894092428
    X160      c1564     0.0064868714   c1629     0.5115712545
    X160      c1722     8.5851057E-5   c1731     1.8127006E-4
    X160      c1764     0.0122066429   c1785     0.9904115550
    X160      c1814     0.7331557907   c1866     0.9036669323
    X160      c1869     0.7903223592   c1871     1.3147410359
    X160      c1872              6.6   c1883     1.1508998169
    X160      c1886     0.6201376711   c1895     0.4059525955
    X160      c1896     0.8277789340
    X161      obj                152   G161                 8
    X161      c27                  1   c69                  1
    X161      c111                 4   c147                 7
    X161      c1360     0.4431039618   c1564     0.0043697206
    X161      c1629     0.3410475030   c1722     5.3614712E-5
    X161      c1731     6.9822523E-5   c1764     0.0060286604
    X161      c1869     2.3674576E-6   c1883     0.5706141949
    X162      obj                249   G162                 6
    X162      c20                  1   c49                  1
    X162      c62                  1   c1564     7.4557206E-4
    X162      c1691     0.6499057530   c1722     0.0037354042
    X162      c1731     9.8045553E-4   c1764     5.3589918E-4
    X162      c1785     9.2596066E-5   c1814     0.2438977571
    X162      c1866     3.3911721E-4   c1869     0.0255469255
    X162      c1886     1.7973521E-4   c1895     0.2594654853
    X162      c1908     1.0238297662
    X163      obj                126   G163                13
    X163      c20                  1   c49                  1
    X163      c50                  1   c62                  1
    X163      c1564     7.5242787E-4   c1691     0.6499057530
    X163      c1722     0.0037354532   c1731     9.8045553E-4
    X163      c1764     5.5686680E-4   c1785     9.2596066E-5
    X163      c1814     0.2438977571   c1866     3.3911721E-4
    X163      c1869     0.0255469256   c1886     1.7973521E-4
    X163      c1895     0.2594654853   c1908      1.324956168
    X164      obj                145   G164                21
    X164      c20                  1   c49                  1
    X164      c50                  1   c62                  1
    X164      c108                 1   c985                 1
    X164      c1564     0.0014899570   c1691     0.6499057530
    X164      c1722     0.0037681705   c1731     9.8045553E-4
    X164      c1764     0.0012367374   c1785     9.2596066E-5
    X164      c1814     0.2438977571   c1866     3.3911721E-4
    X164      c1869     0.0318382987   c1886     1.7973521E-4
    X164      c1895     0.2594654853   c1908     1.0238297662
    X164      c1914                1
    X165      obj                235   G165                11
    X165      c20                  1   c49                  1
    X165      c50                  1   c62                  1
    X165      c76                  1   c108                 1
    X165      c789      0.3673904415   c1564     0.0015944036
    X165      c1691     0.6499057530   c1722     0.0038239250
    X165      c1731     0.0010325264   c1759     0.5195719363
    X165      c1764     0.0014163469   c1785     9.2596066E-5
    X165      c1814     0.2438977571   c1866     3.3911721E-4
    X165      c1869     0.0318544979   c1878     0.1671567868
    X165      c1886     1.7973521E-4   c1895     0.2594654853
    X165      c1908     1.0238297662   c1913     0.7971014492
    X166      obj                234   G166                20
    X166      c20                  1   c42                  1
    X166      c49                  1   c50                  1
    X166      c62                  1   c106                 1
    X166      c108                 1   c1398     0.4716125521
    X166      c1564     1.4595806354   c1691     0.6499057530
    X166      c1722     0.3098477943   c1731     0.0126322314
    X166      c1763              8.5   c1764     0.6256284825
    X166      c1785     9.2596066E-5   c1814     0.2438977571
    X166      c1866     3.3911721E-4   c1869     0.0318745559
    X166      c1886     1.7973521E-4   c1895     0.2594654853
    X166      c1907     1.0046367852   c1908     1.0238297662
    X167      obj                 92   G167                 4
    X167      c62                  1   c959      0.3892165884
    X167      c1230     0.4083965228   c1564     0.0052010885
    X167      c1691     0.6499057530   c1722     0.0037673163
    X167      c1731     0.0038828116   c1764     0.0025639475
    X167      c1797     0.0034185233   c1861     0.0073014691
    X167      c1869     0.0142007184   c1897     0.8292686191
    X167      c1900     0.3163614578   c1908     0.1204505607
    X168      obj                201   G168                35
    X168      c20                  1   c40                  1
    X168      c49                  1   c50                  1
    X168      c62                  1   c71                  2
    X168      c90                 19   c93                  9
    X168      c102                 9   c108                 1
    X168      c110                 9   c113                19
    X168      c1179     2.1491519928   c1186      2.323045471
    X168      c1449     2.0851487246   c1468     1.0378431186
    X168      c1564     0.0040202086   c1691     0.6499057530
    X168      c1722     0.0041684739   c1731     9.8045553E-4
    X168      c1764     0.0023991205   c1771     1.4579697166
    X168      c1785     0.0034912804   c1814     0.2438977571
    X168      c1853     2.1502610967   c1862     1.3903686293
    X168      c1866     3.3911721E-4   c1869     0.2140610881
    X168      c1886     1.7973521E-4   c1895     0.2594654853
    X168      c1908     1.6246489261
    X169      obj                142   G169                13
    X169      c49                  1   c50                  1
    X169      c109                 5   c1564     2.4334162E-4
    X169      c1691     0.2933602357   c1712     0.4741064916
    X169      c1722     0.0029947362   c1731     4.0297750E-4
    X169      c1764     1.1178974E-4   c1814     0.1404447736
    X169      c1869     0.0064099736   c1908     0.4893304029
    X170      obj                106   G170                20
    X170      c3                   1   c20                  1
    X170      c49                  1   c50                  1
    X170      c62                  1   c81                  3
    X170      c105                10   c108                 1
    X170      c465      0.6708004509   c1360     0.5317247542
    X170      c1564     0.0736459440   c1629     0.5968331303
    X170      c1691     0.7773382536   c1722     0.0081272959
    X170      c1731     0.3403985849   c1764     0.1702543879
    X170      c1768     1.5596330275   c1785     9.2596066E-5
    X170      c1797     1.2180774013   c1814     0.2438977571
    X170      c1861     0.9080735300   c1866     3.3911721E-4
    X170      c1869     0.0351174918   c1883     0.6277635365
    X170      c1886     1.7973521E-4   c1895     0.2594654853
    X170      c1902     4.2857142857   c1908     1.0238297662
    X171      obj                113   G171                 9
    X171      c20                  1   c50                  1
    X171      c62                  1   c108                 1
    X171      c959      0.5838248827   c1230     0.3796020269
    X171      c1541     2.9318181818   c1564     0.0057681750
    X171      c1691     0.6499057530   c1716     13.909090909
    X171      c1722     0.0037714171   c1731     0.0078490956
    X171      c1764     0.0032451067   c1785     9.2596066E-5
    X171      c1797     0.0051277850   c1813                7
    X171      c1814     0.2438977571   c1861     0.0231676075
    X171      c1866     3.3911721E-4   c1869     0.0329444717
    X171      c1886     1.7973521E-4   c1895     0.2594654853
    X171      c1897     0.1608548280   c1900     0.6228957408
    X171      c1908     1.0238297662
    X172      obj                134   G172                 7
    X172      c20                  1   c49                  1
    X172      c50                  1   c62                  1
    X172      c108                 1   c1564     0.0014655903
    X172      c1691     0.6499057530   c1722     0.0037405443
    X172      c1731     9.8045553E-4   c1764     0.0012255435
    X172      c1785     9.2596066E-5   c1814     0.2438977571
    X172      c1866     3.3911721E-4   c1869     0.0318346788
    X172      c1886     1.7973521E-4   c1895     0.2594654853
    X172      c1908     1.0238297662
    X173      obj                 90   G173                18
    X173      c49                  1   c50                  1
    X173      c62                  1   c108                 1
    X173      c1037     1.0033717722   c1432     0.1844027104
    X173      c1465     0.1522253239   c1564     0.0012270535
    X173      c1691     0.6499057530   c1722     0.0037388415
    X173      c1731     9.1055832E-4   c1764     0.0014170403
    X173      c1785     0.0694206213   c1814     0.6617231962
    X173      c1866     0.1174215349   c1869     0.1160776800
    X173      c1886     0.8105224934   c1895     0.2594654853
    X173      c1896     0.1591884307   c1908     0.3011264018
    X174      obj                138   G174                14
    X174      c20                  1   c49                  1
    X174      c50                  1   c62                  1
    X174      c108                 1   c1564     0.0014655903
    X174      c1691     0.6499057530   c1722     0.0037405443
    X174      c1731     9.8045553E-4   c1764     0.0012255435
    X174      c1785     9.2596066E-5   c1814     0.2438977571
    X174      c1866     3.3911721E-4   c1869     0.0318346788
    X174      c1886     1.7973521E-4   c1895     0.2594654853
    X174      c1908     1.0238297662
    X175      obj                114   G175                22
    X175      c20                  1   c29                  1
    X175      c108                 1   c789      1.6339839736
    X175      c1564     0.0012223026   c1691     0.9026468792
    X175      c1722     0.0057744020   c1731     0.0014999644
    X175      c1759      1.604096068   c1764     9.3918126E-4
    X175      c1785     9.2596066E-5   c1814     0.2438977571
    X175      c1866     3.3911721E-4   c1869     0.0374239842
    X175      c1878     1.5322705464   c1886     1.7973521E-4
    X175      c1895     0.2594654853   c1908      1.324956168
    X175      c1913     1.5942028986
    X176      obj                239   G176                33
    X176      c11                  1   c20                  1
    X176      c32                  1   c49                  1
    X176      c50                  1   c62                  1
    X176      c88                  1   c100                 8
    X176      c107                 8   c108                 1
    X176      c109                25   c1564     0.1287105175
    X176      c1662     1.0124111003   c1691     2.1167069318
    X176      c1712     2.3705324581   c1722     0.8340973118
    X176      c1731     0.0221837154   c1733     1.1210191083
    X176      c1764     0.1473633641   c1785     9.2596066E-5
    X176      c1797     0.0139481667   c1814     0.9461216252
    X176      c1861     0.0297912573   c1866     3.3911721E-4
    X176      c1869     0.0642237462   c1886     1.7973521E-4
    X176      c1895     0.2594654853   c1903     1.9284149014
    X176      c1904                8   c1908     2.5671025756
    X177      obj                222   G177                38
    X177      c20                  1   c45                 23
    X177      c49                  1   c50                  1
    X177      c51                  1   c52                  1
    X177      c62                  1   c97                  1
    X177      c108                 1   c1037     0.6241068439
    X177      c1119     1.4398937773   c1432     0.6719608434
    X177      c1465      1.735969697   c1564     0.0907549824
    X177      c1691     1.5525526323   c1712      1.458789205
    X177      c1722     0.0095586357   c1731     0.0025391931
    X177      c1764     0.0556620185   c1785     1.5022443376
    X177      c1814      1.768652528   c1866     1.5930810067
    X177      c1869     1.5736448545   c1886     0.5698592767
    X177      c1895     0.9890944555   c1896     1.3514213278
    X177      c1908     1.6648680814
    X178      obj                262   G178                11
    X178      c1                   1   c20                  1
    X178      c49                  1   c50                  1
    X178      c62                  1   c108                 1
    X178      c1037     0.5777670657   c1119     0.7280271006
    X178      c1432     0.9588930453   c1465     0.8894092428
    X178      c1564     0.0027078305   c1691     0.6499057530
    X178      c1722     0.0037889548   c1731     0.0010183983
    X178      c1764     0.0077185121   c1785     0.9905041511
    X178      c1814     0.9770535478   c1866     0.9040060495
    X178      c1869     0.8221546564   c1871     1.3147410359
    X178      c1872              6.6   c1886     0.5674407238
    X178      c1895     0.6654180809   c1896     0.8277789340
    X178      c1908     1.0238297662
    X179      obj                205   G179                 8
    X179      c20                  1   c49                  1
    X179      c50                  1   c62                  1
    X179      c108                 1   c1564     0.0014655903
    X179      c1691     0.6499057530   c1722     0.0037405443
    X179      c1731     9.8045553E-4   c1764     0.0012255435
    X179      c1785     9.2596066E-5   c1814     0.2438977571
    X179      c1866     3.3911721E-4   c1869     0.0318346788
    X179      c1886     1.7973521E-4   c1895     0.2594654853
    X179      c1908     1.0238297662
    X180      obj                 95   G180                 6
    X180      c17                  2   c65                  1
    X180      c1398     0.9250861599   c1564     0.6876087908
    X180      c1662     0.6223479490   c1722     0.7206494860
    X180      c1731     0.0068839960   c1764     0.3503893816
    X180      c1869     8.1899825E-5   c1880                6
    X180      c1907     0.4636785162
    X181      obj                251   G181                13
    X181      c65                  1   c96                  1
    X181      c1398     0.6167241066   c1564     0.4614028678
    X181      c1662     0.2761121182   c1722     0.7378315718
    X181      c1731     0.0068839960   c1764     0.2180236334
    X181      c1869     1.2038357E-4   c1880                4
    X181      c1907     0.3091190108
    X182      obj                145   G182                21
    X182      c65                  1   c95                  1
    X182      c96                  1   c985                 1
    X182      c1398     0.6167241066   c1564     0.4901830331
    X182      c1662     0.3681494910   c1722     0.8237772039
    X182      c1731     0.0251437696   c1764     0.2341951457
    X182      c1797     0.0161367054   c1861     0.0344656580
    X182      c1869     1.2038357E-4   c1880                4
    X182      c1907     0.3091190108   c1914                1
    X183      obj                131   G183                11
    X183      c65                  1   c76                  1
    X183      c95                  1   c789      0.3673904415
    X183      c1398     0.6167241066   c1564     0.4615298814
    X183      c1662     0.2761121182   c1722     0.5216254863
    X183      c1731     0.0069331134   c1759     0.5195719363
    X183      c1764     0.2181082921   c1869     8.5723077E-5
    X183      c1878     0.1671567868   c1880                4
    X183      c1907     0.3091190108   c1913     0.7971014492
    X184      obj                130   G184                20
    X184      c17                 16   c42                  1
    X184      c95                  1   c96                  1
    X184      c106                 1   c1398     1.1971703247
    X184      c1564     2.2170852867   c1662     2.7698866466
    X184      c1722     1.0751612712   c1731     0.0159760468
    X184      c1763              8.5   c1764     1.0317074766
    X184      c1869     1.8656850E-4   c1880               20
    X184      c1907     1.5455950541
    X185      obj                222   G185                 4
    X185      c65                  1   c95                  1
    X185      c1398     0.6167241066   c1564     0.4614010681
    X185      c1662     0.2761121182   c1722     0.5215582763
    X185      c1731     0.0068839960   c1764     0.2180181291
    X185      c1869     6.5903977E-5   c1880                4
    X185      c1907     0.3091190108
    X186      obj                192   G186                22
    X186      c40                  1   c65                  1
    X186      c71                  1   c93                  9
    X186      c95                  1   c96                  1
    X186      c102                 9   c110                 9
    X186      c1179     1.1370977491   c1186     2.0164034688
    X186      c1398     0.6167241066   c1449     0.8141570704
    X186      c1468     0.5634005500   c1564     0.4614084886
    X186      c1662     0.2761121182   c1722     0.7381488898
    X186      c1731     0.0068839960   c1764     0.2195134253
    X186      c1771     0.9071304781   c1785     0.0033986843
    X186      c1853     0.8803422982   c1862     0.6951843146
    X186      c1869     0.1822952778   c1880                4
    X186      c1907     0.3091190108   c1908     0.0815842460
    X187      obj                179   G187                13
    X187      c65                  1   c95                  1
    X187      c96                  1   c1398     0.6167241066
    X187      c1564     0.4614028678   c1662     0.2761121182
    X187      c1722     0.7378315718   c1731     0.0068839960
    X187      c1764     0.2180236334   c1869     1.2038357E-4
    X187      c1880                4   c1907     0.3091190108
    X188      obj                183   G188                20
    X188      c3                   1   c65                  1
    X188      c81                  3   c95                  1
    X188      c96                  1   c105                10
    X188      c465      0.6708004509   c1360     0.5317247542
    X188      c1398     0.6167241066   c1564     0.5335560357
    X188      c1629     0.5968331303   c1662     0.2761121182
    X188      c1691     0.1274325006   c1722     0.8267428352
    X188      c1731     0.1451625862   c1764     0.2865150872
    X188      c1768     1.5596330275   c1797     0.4576630937
    X188      c1861     0.4007350613   c1869     0.0033417541
    X188      c1880                4   c1883     0.6277635365
    X188      c1902     4.2857142857   c1907     0.3091190108
    X189      obj                234   G189                 9
    X189      c65                  1   c95                  1
    X189      c96                  1   c1398     0.6167241066
    X189      c1564     0.4614028678   c1662     0.2761121182
    X189      c1722     0.7378315718   c1731     0.0068839960
    X189      c1764     0.2180236334   c1869     1.2038357E-4
    X189      c1880                4   c1907     0.3091190108
    X190      obj                196   G190                 7
    X190      c65                  1   c95                  1
    X190      c96                  1   c1398     0.6167241066
    X190      c1564     0.4614028678   c1662     0.2761121182
    X190      c1722     0.7378315718   c1731     0.0068839960
    X190      c1764     0.2180236334   c1869     1.2038357E-4
    X190      c1880                4   c1907     0.3091190108
    X191      obj                106   G191                18
    X191      c65                  1   c95                  1
    X191      c96                  1   c1398     0.6167241066
    X191      c1564     0.4614028678   c1662     0.2761121182
    X191      c1722     0.7378315718   c1731     0.0068839960
    X191      c1764     0.2180236334   c1869     1.2038357E-4
    X191      c1880                4   c1907     0.3091190108
    X192      obj                200   G192                14
    X192      c65                  1   c95                  1
    X192      c96                  1   c1398     0.6167241066
    X192      c1564     0.4614028678   c1662     0.2761121182
    X192      c1722     0.7378315718   c1731     0.0068839960
    X192      c1764     0.2180236334   c1869     1.2038357E-4
    X192      c1880                4   c1907     0.3091190108
    X193      obj                147   G193                22
    X193      c29                  1   c65                  1
    X193      c95                  1   c96                  1
    X193      c789      0.8654756836   c1398     0.6167241066
    X193      c1564     0.4769050672   c1662     0.3681494910
    X193      c1722     0.8239183018   c1731     0.0069793125
    X193      c1759     1.2075065909   c1764     0.2272304326
    X193      c1869     1.4501679E-4   c1878     0.9332920600
    X193      c1880                4   c1907     0.3091190108
    X193      c1913     1.5942028986
    X194      obj                 72   G194                22
    X194      c11                  1   c22                 16
    X194      c65                  1   c95                  1
    X194      c96                  1   c100                 8
    X194      c107                 8   c1398     0.6167241066
    X194      c1564     0.5247105537   c1662     1.0124111003
    X194      c1722     1.2874118739   c1731     0.0223040935
    X194      c1733     0.8492569002   c1764     0.3274107795
    X194      c1797     0.0139481667   c1861     0.0297912573
    X194      c1869     3.3228773E-4   c1880                4
    X194      c1903     1.4609203798   c1907     0.3091190108
    X195      obj                176   G195                22
    X195      c51                  1   c52                  1
    X195      c65                  1   c95                  1
    X195      c96                  1   c97                  1
    X195      c1037     0.6241068439   c1119     1.4398937773
    X195      c1398     0.6167241066   c1432     0.6719608434
    X195      c1465      1.735969697   c1564     0.5566446617
    X195      c1662     0.5960515568   c1722     0.8239503551
    X195      c1731     0.0071849737   c1764     0.2896294468
    X195      c1785     1.5021517416   c1814     1.0926170059
    X195      c1866     1.5927418895   c1869     1.5221531927
    X195      c1880                4   c1886     0.5696795415
    X195      c1895     0.7296289701   c1896     1.3514213278
    X195      c1907     0.3091190108
    X196      obj                231   G196                11
    X196      c1                   1   c65                  1
    X196      c95                  1   c96                  1
    X196      c1037     0.5777670657   c1119     0.7280271006
    X196      c1398     0.6167241066   c1432     0.9588930453
    X196      c1465     0.8894092428   c1564     0.4626451080
    X196      c1662     0.2761121182   c1722     0.7378799823
    X196      c1731     0.0069116565   c1764     0.2242016160
    X196      c1785     0.9904115550   c1814     0.7331557907
    X196      c1866     0.9036669323   c1869     0.7903858816
    X196      c1871     1.3147410359   c1872              6.6
    X196      c1880                4   c1886     0.5672609886
    X196      c1895     0.4059525955   c1896     0.8277789340
    X196      c1907     0.3091190108
    X197      obj                160   G197                 8
    X197      c65                  1   c95                  1
    X197      c96                  1   c1398     0.6167241066
    X197      c1564     0.4614028678   c1662     0.2761121182
    X197      c1722     0.7378315718   c1731     0.0068839960
    X197      c1764     0.2180236334   c1869     1.2038357E-4
    X197      c1880                4   c1907     0.3091190108
    X198      obj                109   G198                 6
    X198      c7                   1   c48                  1
    X198      c56                  1   c82                  1
    X198      c1564     0.1778276136   c1722     0.0012775667
    X198      c1731     0.7284391390   c1764     0.1738435948
    X198      c1797     0.5239072989   c1861     0.5627686569
    X198      c1869     4.2831022E-5
    X199      obj                234   G199                13
    X199      c7                   1   c48                  1
    X199      c56                  1   c82                  1
    X199      c1564     0.1778276136   c1722     0.0012775667
    X199      c1731     0.7284391390   c1764     0.1738435948
    X199      c1797     0.5239072989   c1861     0.5627686569
    X199      c1869     4.2831022E-5
    X200      obj                 78   G200                21
    X200      c48                  1   c56                  1
    X200      c77                 17   c91                 11
    X200      c101                20   c1564     0.3236694986
    X200      c1722     0.0023194526   c1731     1.9838166538
    X200      c1764     0.2185374654   c1797     0.9139139401
    X200      c1861     0.6146120909   c1869     1.2462588E-5
    X201      obj                115   G201                11
    X201      c7                   1   c48                  1
    X201      c56                  1   c76                  1
    X201      c82                  1   c789      0.3673904415
    X201      c1564     0.1779573401   c1722     0.0013609538
    X201      c1731     0.7284882564   c1759     0.5195719363
    X201      c1764     0.1740348178   c1797     0.5239072989
    X201      c1861     0.5627686569   c1869     6.2650136E-5
    X201      c1878     0.1671567868   c1913     0.7971014492
    X202      obj                136   G202                20
    X202      c7                   1   c42                  1
    X202      c48                  1   c56                  1
    X202      c82                  1   c106                 1
    X202      c1398     0.4716125521   c1564     1.6372258758
    X202      c1722     0.3073939773   c1731     0.7284391390
    X202      c1763              8.5   c1764     0.7516117391
    X202      c1797     0.5239072989   c1861     0.5627686569
    X202      c1869     8.2729029E-5   c1907     1.0046367852
    X203      obj                221   G203                 4
    X203      c48                  1   c1564     0.1749189738
    X203      c1722     0.0012568024   c1731     0.4933124027
    X203      c1764     0.1129610916   c1797     0.2689277328
    X203      c1861     0.5314584177   c1869     9.4365918E-6
    X204      obj                252   G204                33
    X204      c7                   1   c40                  1
    X204      c48                  2   c56                  1
    X204      c71                  1   c82                  1
    X204      c93                  9   c102                 9
    X204      c110                 9   c1179     1.1370977491
    X204      c1186     2.0164034688   c1449     0.8141570704
    X204      c1468     0.5634005500   c1564     0.3390382532
    X204      c1722     0.0027477894   c1731     1.4201236718
    X204      c1764     0.2805071562   c1771     0.9071304781
    X204      c1785     0.0033986843   c1797     0.5239072989
    X204      c1853     1.8041299146   c1861     0.7081643881
    X204      c1862     0.6951843146   c1869     0.1822735233
    X204      c1908     0.0815842460
    X205      obj                129   G205                13
    X205      c7                   1   c48                  1
    X205      c56                  1   c82                  1
    X205      c101                12   c985                12
    X205      c1564     0.3102834065   c1722     0.0025541937
    X205      c1731     1.8606675697   c1764     0.2346930278
    X205      c1797     1.0399950859   c1861     0.6755653561
    X205      c1869     8.9740476E-5   c1914               12
    X206      obj                 80   G206                20
    X206      c3                   1   c7                   1
    X206      c48                  1   c465      0.7891770011
    X206      c1360     0.6255585344   c1564     0.2451708355
    X206      c1629     0.7021566239   c1691     0.1274325006
    X206      c1722     0.0056217750   c1731     1.0581359649
    X206      c1764     0.2359849003   c1768     1.5596330275
    X206      c1797     1.5622841692   c1861     1.0001719653
    X206      c1869     0.0033190324   c1883     0.7385453370
    X206      c1902     4.2857142857
    X207      obj                 94   G207                 9
    X207      c7                   1   c48                  1
    X207      c56                  1   c77                  5
    X207      c82                  1   c959      0.9504125997
    X207      c1230     1.0150978177   c1541     6.5909090909
    X207      c1564     0.1940127056   c1716     6.5909090909
    X207      c1722     0.0018770941   c1731     0.7417360493
    X207      c1764     0.1812789334   c1797     0.5322548559
    X207      c1813                7   c1861     0.9099988510
    X207      c1869     0.0130514053   c1897     1.2812317205
    X207      c1900     0.7725105366
    X208      obj                 65   G208                 7
    X208      c77                  3
    X209      obj                177   G209                18
    X209      c7                   1   c48                  1
    X209      c56                  1   c82                  1
    X209      c1564     0.1778276136   c1722     0.0012775667
    X209      c1731     0.7284391390   c1764     0.1738435948
    X209      c1797     0.5239072989   c1861     0.5627686569
    X209      c1869     4.2831022E-5
    X210      obj                258   G210                14
    X210      c7                   1   c48                  1
    X210      c56                  1   c82                  1
    X210      c1564     0.1778276136   c1722     0.0012775667
    X210      c1731     0.7284391390   c1764     0.1738435948
    X210      c1797     0.5239072989   c1861     0.5627686569
    X210      c1869     4.2831022E-5
    X211      obj                137   G211                22
    X211      c7                   1   c29                  1
    X211      c48                  1   c56                  1
    X211      c82                  1   c91                 12
    X211      c789      0.7401212267   c1564     0.3838093714
    X211      c1722     0.0033346640   c1731     2.5009332158
    X211      c1759     1.2075065909   c1764     0.2684704351
    X211      c1797     1.0399950859   c1861     0.6755653561
    X211      c1869     8.7297409E-5   c1878     0.6964866119
    X211      c1913     0.7246376811
    X212      obj                185   G212                33
    X212      c7                   1   c11                  1
    X212      c32                  1   c48                  2
    X212      c56                  1   c82                  1
    X212      c88                  1   c1564     0.4343122921
    X212      c1662     0.6442616092   c1722        0.8219905
    X212      c1731     1.4391186112   c1733     1.1210191083
    X212      c1764     0.3688289670   c1797     0.5378554656
    X212      c1861     1.1255373138   c1869     3.7834254E-4
    X212      c1903     1.9284149014
    X213      obj                242   G213                33
    X213      c7                   1   c48                  2
    X213      c51                  1   c52                  1
    X213      c56                  1   c82                  1
    X213      c97                  1   c1037     0.6241068439
    X213      c1119     1.4398937773   c1432     0.6719608434
    X213      c1465      1.735969697   c1564     0.4236894837
    X213      c1722     0.0030348227   c1731     0.8814212131
    X213      c1764     0.3237070993   c1785     1.5021517416
    X213      c1797     0.5239072989   c1814     1.0926170059
    X213      c1861     0.7081643881   c1866     1.5927418895
    X213      c1869      1.522134272   c1886     0.5696795415
    X213      c1895     0.7296289701   c1896     1.3514213278
    X214      obj                181   G214                11
    X214      c1                   1   c7                   1
    X214      c48                  1   c56                  1
    X214      c82                  1   c1037     0.5777670657
    X214      c1119     0.7280271006   c1432     0.9588930453
    X214      c1465     0.8894092428   c1564     0.1799447644
    X214      c1722     0.0013322230   c1731     0.7284667995
    X214      c1764     0.1807384923   c1785     0.9904115550
    X214      c1797     0.5239072989   c1814     0.7331557907
    X214      c1861     0.5627686569   c1866     0.9036669323
    X214      c1869     0.7903628228   c1871     1.3147410359
    X214      c1872              6.6   c1886     0.5672609886
    X214      c1895     0.4059525955   c1896     0.8277789340
    X215      obj                132   G215                 8
    X215      c7                   1   c48                  1
    X215      c56                  1   c82                  1
    X215      c1564     0.1778276136   c1722     0.0012775667
    X215      c1731     0.7284391390   c1764     0.1738435948
    X215      c1797     0.5239072989   c1861     0.5627686569
    X215      c1869     4.2831022E-5
    X216      obj                107   G216                 6
    X216      c30                  1   c1564     9.6078322E-7
    X216      c1722     2.8719372E-5   c1731     3.2228512E-9
    X216      c1764     2.9384321E-6   c1869     2.9540811E-5
    X216      c1908     0.0140058791
    X217      obj                233   G217                13
    X217      c30                  1   c1564     9.6078322E-7
    X217      c1722     2.8719372E-5   c1731     3.2228512E-9
    X217      c1764     2.9384321E-6   c1869     2.9540811E-5
    X217      c1908     0.0140058791
    X218      obj                 91   G218                21
    X218      c1914                1
    X219      obj                112   G219                11
    X219      c30                  1   c76                  1
    X219      c789      0.3673904415   c1564     1.2977408E-4
    X219      c1722     9.5929399E-5   c1731     1.2264410E-4
    X219      c1759     0.5195719363   c1764     1.9124484E-4
    X219      c1869     4.7013365E-5   c1878     0.1671567868
    X219      c1908     0.0140058791   c1913     0.7971014492
    X220      obj                261   G220                20
    X220      c30                  1   c42                  1
    X220      c106                 1   c1398     0.4716125521
    X220      c1564     1.4593982621   c1722     0.3061164106
    X220      c1731     0.0117266502   c1763              8.5
    X220      c1764     0.6250945107   c1869     5.5315064E-5
    X220      c1907     1.0046367852   c1908     0.0140058791
    X221      obj                150   G221                 4
    X221      c30                  1   c1564     9.6078322E-7
    X221      c1722     2.8719372E-5   c1731     3.2228512E-9
    X221      c1764     2.9384321E-6   c1869     2.9540811E-5
    X221      c1908     0.0140058791
    X222      obj                119   G222                22
    X222      c30                  1   c40                  1
    X222      c64                 19   c71                  1
    X222      c90                 19   c93                  9
    X222      c102                 9   c110                 9
    X222      c1179      1.759920826   c1186      2.323045471
    X222      c1449     2.0851487246   c1468     0.5634005500
    X222      c1564     0.0025191510   c1722     6.9597951E-4
    X222      c1731     6.5364441E-5   c1764     0.0015038224
    X222      c1771     2.4715493456   c1785     0.0033986843
    X222      c1853     2.1050492429   c1862     1.7084338449
    X222      c1869     0.1823159466   c1908     0.0955901252
    X223      obj                102   G223                13
    X223      c30                  1   c1564     9.6078322E-7
    X223      c1722     2.8719372E-5   c1731     3.2228512E-9
    X223      c1764     2.9384321E-6   c1869     2.9540811E-5
    X223      c1908     0.0140058791
    X224      obj                207   G224                20
    X224      c3                   1   c30                  1
    X224      c81                  3   c105                10
    X224      c465      0.6708004509   c1360     0.5317247542
    X224      c1564     0.0721559870   c1629     0.5968331303
    X224      c1691     0.1274325006   c1722     0.0030120344
    X224      c1731     0.1419070547   c1764     0.0685000757
    X224      c1768     1.5596330275   c1797     0.4576630937
    X224      c1861     0.4007350613   c1869     0.0032758501
    X224      c1883     0.6277635365   c1902     4.2857142857
    X224      c1908     0.0140058791
    X225      obj                138   G225                 9
    X225      c30                  1   c1230     0.9155140633
    X225      c1564     0.0116594276   c1716     6.5909090909
    X225      c1722     8.3234727E-5   c1731     0.0038836012
    X225      c1764     0.0053562742   c1869     0.0031734091
    X225      c1897     0.3395550272   c1908     0.0140058791
    X226      obj                 71   G226                 7
    X226      c30                  1   c1564     9.6078322E-7
    X226      c1722     2.8719372E-5   c1731     3.2228512E-9
    X226      c1764     2.9384321E-6   c1869     2.9540811E-5
    X226      c1908     0.0140058791
    X227      obj                122   G227                18
    X227      c30                  1   c1564     9.6078322E-7
    X227      c1722     2.8719372E-5   c1731     3.2228512E-9
    X227      c1764     2.9384321E-6   c1869     2.9540811E-5
    X227      c1908     0.0140058791
    X228      obj                125   G228                14
    X228      c30                  1   c1564     9.6078322E-7
    X228      c1722     2.8719372E-5   c1731     3.2228512E-9
    X228      c1764     2.9384321E-6   c1869     2.9540811E-5
    X228      c1908     0.0140058791
    X229      obj                166   G229                22
    X229      c29                  1   c30                  1
    X229      c789      0.7401212267   c1564     1.8965385E-4
    X229      c1722     5.8636105E-4   c1731     1.7839441E-4
    X229      c1759     1.2075065909   c1764     1.8352390E-4
    X229      c1869     5.4174030E-5   c1878     0.6964866119
    X229      c1908     0.0140058791   c1913     0.7246376811
    X230      obj                168   G230                22
    X230      c11                  1   c30                  1
    X230      c32                  1   c88                  1
    X230      c1564     0.0808353865   c1662     0.6442616092
    X230      c1722     0.8206737461   c1731     0.0191073475
    X230      c1764     0.0816887765   c1797     0.0139481667
    X230      c1861     0.0297912573   c1869     2.6726207E-4
    X230      c1908     0.0140058791
    X231      obj                144   G231                22
    X231      c30                  1   c45                  7
    X231      c61                 20   c85                 20
    X231      c97                  1   c1037     0.3120534219
    X231      c1119     0.7199468886   c1432     0.3359804217
    X231      c1465     0.8679848484   c1564     0.0854339486
    X231      c1722     6.1086284E-4   c1731     3.7028068E-4
    X231      c1764     0.0414036931   c1785     0.7652334996
    X231      c1814     0.5463085029   c1866     1.3340894801
    X231      c1869     1.2254724259   c1886     0.2848397707
    X231      c1895     0.3648144850   c1896     1.0613811438
    X231      c1908     0.0215475063
    X232      obj                174   G232                11
    X232      c1                   1   c30                  1
    X232      c1037     0.5777670657   c1119     0.7280271006
    X232      c1432     0.9588930453   c1465     0.8894092428
    X232      c1564     0.0021171507   c1722     6.0955716E-5
    X232      c1731     1.1144754E-4   c1764     0.0068948974
    X232      c1785     0.9904115550   c1814     0.7331557907
    X232      c1866     0.9036669323   c1869     0.7903199918
    X232      c1871     1.3147410359   c1872              6.6
    X232      c1886     0.5672609886   c1895     0.4059525955
    X232      c1896     0.8277789340   c1908     0.0140058791
    X233      obj                241   G233                 8
    X233      c30                  1   c1564     9.6078322E-7
    X233      c1722     2.8719372E-5   c1731     3.2228512E-9
    X233      c1764     2.9384321E-6   c1869     2.9540811E-5
    X233      c1908     0.0140058791
    X234      obj                191   G234                 6
    X234      c14                  1   c60                  1
    X234      c80                  1   c574      0.5084745762
    X234      c1037     0.0088038057   c1432     0.0137098884
    X234      c1465     0.0111146701   c1564     1.7883139E-5
    X234      c1722     5.4456356E-6   c1731     9.2456351E-7
    X234      c1764     3.0343894E-4   c1785     0.0054331846
    X234      c1814     0.1561867417   c1866     0.0143387352
    X234      c1869     0.0577842233   c1886     0.0134883872
    X234      c1890     0.9762828805   c1892      1.114296005
    X234      c1895     0.6803882105   c1896     0.0118062944
    X235      obj                154   G235                13
    X235      c14                  1   c15                  1
    X235      c80                  2   c574      1.8644067797
    X235      c1037     0.0142106483   c1432     0.0151164078
    X235      c1465     0.0111146701   c1564     1.9057787E-5
    X235      c1722     1.9635276E-5   c1731     9.2456351E-7
    X235      c1764     3.0437862E-4   c1785     0.0059605317
    X235      c1814     0.1572343944   c1866     0.0166058649
    X235      c1869     0.0887830439   c1886     0.0204233285
    X235      c1890     2.9969814575   c1892      2.655738812
    X235      c1895     1.7303495416   c1896     0.0122948703
    X236      obj                101   G236                21
    X236      c14                  1   c15                  1
    X236      c60                  1   c80                  2
    X236      c574      1.8644067797   c1037     0.0142106483
    X236      c1432     0.0144809005   c1465     0.0111146701
    X236      c1564     1.9057787E-5   c1722     1.9635276E-5
    X236      c1731     9.2456351E-7   c1764     3.0414701E-4
    X236      c1785     0.0057235222   c1814     0.1572343944
    X236      c1866     0.0166058649   c1869     0.0885090722
    X236      c1886     0.0192344423   c1890     2.1285036654
    X236      c1892     2.0057328091   c1895     1.4465135443
    X236      c1896     0.0122948703
    X237      obj                 66   G237                11
    X237      c72                  8   c76                  1
    X237      c80                  1   c574      0.9322033898
    X237      c789      0.3673904415   c1037     0.0037576233
    X237      c1119     0.0193925087   c1432     0.0082639100
    X237      c1465     0.0233800632   c1564     1.4142317E-4
    X237      c1722     9.3220264E-5   c1731     1.2392729E-4
    X237      c1759     0.5195719363   c1764     2.5470843E-4
    X237      c1785     0.0199378395   c1814     0.0146593187
    X237      c1866     0.0235998546   c1869     0.0392598807
    X237      c1878     0.7661352731   c1886     0.0047488584
    X237      c1890     0.9581716257   c1892     1.0214380046
    X237      c1895     0.4558220351   c1896     0.0176150354
    X237      c1913     0.7971014492
    X238      obj                156   G238                20
    X238      c14                  1   c15                  1
    X238      c42                  1   c60                  1
    X238      c80                  2   c106                 1
    X238      c574      1.8644067797   c1037     0.0142106483
    X238      c1398     0.4716125521   c1432     0.0144809005
    X238      c1465     0.0111146701   c1564      1.692275531
    X238      c1722     0.3077983822   c1731     0.0125086694
    X238      c1763              8.5   c1764     0.6251391880
    X238      c1785     0.0057235222   c1814     0.1572343944
    X238      c1866     0.0166058649   c1869     0.0885566810
    X238      c1886     0.0192344423   c1890     2.1285036654
    X238      c1892     2.0057328091   c1895     1.4465135443
    X238      c1896     0.0122948703   c1907     1.2364760433
    X239      obj                128   G239                 4
    X239      c15                  1   c60                  1
    X239      c80                  1   c574      1.8644067797
    X239      c1037     0.0074344086   c1432     0.0012573428
    X239      c1564     1.6151407E-6   c1722     1.9510756E-5
    X239      c1731     1.5590263E-8   c1764     2.7481808E-6
    X239      c1785     4.7275937E-4   c1814     0.0014405223
    X239      c1866     0.0023068969   c1869     0.0450349221
    X239      c1886     0.0078197652   c1890     2.0388098318
    X239      c1892     1.6491580875   c1895     1.0093955424
    X239      c1896     9.3720788E-4
    X240      obj                234   G240                26
    X240      c14                  1   c15                  1
    X240      c40                  1   c60                  1
    X240      c71                  1   c80                  3
    X240      c93                  9   c102                 9
    X240      c110                 9   c574      2.3728813559
    X240      c1037     0.0162382143   c1179     1.1370977491
    X240      c1186     2.0164034688   c1432     0.0146111533
    X240      c1449     0.8141570704   c1465     0.0111146701
    X240      c1468     0.5634005500   c1564     0.0025180290
    X240      c1722     3.6007088E-4   c1731     6.6219127E-5
    X240      c1764     0.0015456624   c1771     0.9071304781
    X240      c1785     0.0091718307   c1814     0.1576272641
    X240      c1853     0.8803422982   c1862     0.6951843146
    X240      c1866     0.0188067157   c1869     0.2822232413
    X240      c1886     0.0210919914   c1890     2.6166451056
    X240      c1892     2.5628808116   c1895     1.6897837529
    X240      c1896     0.0124780862   c1908     0.0815842460
    X241      obj                 75   G241                13
    X241      c14                  1   c15                  1
    X241      c60                  1   c80                  1
    X241      c574      2.4576271186   c1037     0.0165761420
    X241      c1432     0.0151164078   c1465     0.0111146701
    X241      c1564     1.9571695E-5   c1722     2.5843244E-5
    X241      c1731     9.2456351E-7   c1764     3.0446732E-4
    X241      c1785     0.0059617532   c1814     0.1576927424
    X241      c1866     0.0144911765   c1869     0.1020661459
    X241      c1886     0.0223061845   c1890     2.9969814575
    X241      c1892      2.655738812   c1895     1.7303287877
    X241      c1896     0.0125086222
    X242      obj                 86   G242                20
    X242      c3                   1   c14                  1
    X242      c15                  1   c60                  1
    X242      c80                  2   c81                  3
    X242      c105                10   c465      0.6708004509
    X242      c574      1.8644067797   c1037     0.0142106483
    X242      c1360     0.5317247542   c1432     0.0144809005
    X242      c1465     0.0111146701   c1564     0.0721750448
    X242      c1629     0.5968331303   c1691     0.1274325006
    X242      c1722     0.0029928606   c1731     0.1419079743
    X242      c1764     0.0685466804   c1768     1.5596330275
    X242      c1785     0.0057235222   c1797     0.4576630937
    X242      c1814     0.1572343944   c1861     0.4007350613
    X242      c1866     0.0166058649   c1869     0.0885991813
    X242      c1883     0.6277635365   c1886     0.0192344423
    X242      c1890     2.1285036654   c1892     2.0057328091
    X242      c1895     1.4465135443   c1896     0.0122948703
    X242      c1902     4.2857142857
    X243      obj                210   G243                 9
    X243      c14                  1   c15                  1
    X243      c60                  1   c80                  1
    X243      c574      1.8644067797   c1037     0.0142106483
    X243      c1432     0.0144809005   c1465     0.0111146701
    X243      c1564     1.9057787E-5   c1722     4.9863167E-4
    X243      c1731     0.0038454104   c1764     3.0414701E-4
    X243      c1785     0.0057235222   c1813                7
    X243      c1814     0.1572343944   c1866     0.0144447813
    X243      c1869     0.1009143519   c1886     0.0192344423
    X243      c1890     2.0388098318   c1892     1.6491580875
    X243      c1895     1.4465135443   c1896     0.0122948703
    X243      c1900     0.5465906184
    X244      obj                231   G244                 7
    X244      c14                  1   c15                  1
    X244      c60                  1   c80                  1
    X244      c574      1.8644067797   c1037     0.0142106483
    X244      c1432     0.0144809005   c1465     0.0111146701
    X244      c1564     1.9057787E-5   c1722     1.9635276E-5
    X244      c1731     9.2456351E-7   c1764     3.0414701E-4
    X244      c1785     0.0057235222   c1814     0.1572343944
    X244      c1866     0.0144447813   c1869     0.0885090722
    X244      c1886     0.0192344423   c1890     2.0388098318
    X244      c1892     1.6491580875   c1895     1.4465135443
    X244      c1896     0.0122948703
    X245      obj                 79   G245                18
    X245      c14                  1   c15                  1
    X245      c60                  1   c72                 15
    X245      c80                  2   c574      1.8644067797
    X245      c1037      1.013141593   c1119     0.0363609539
    X245      c1432     0.1856506156   c1465     0.5853597582
    X245      c1564     2.4050774E-4   c1722     2.1216171E-5
    X245      c1731     3.1394863E-6   c1764     0.0023896429
    X245      c1785     0.1008422703   c1814     0.3753290297
    X245      c1866     0.1541223311   c1869     0.1695720179
    X245      c1886     0.8224111322   c1890     2.3872358775
    X245      c1892     2.0057328091   c1895     1.4649385183
    X245      c1896     0.1598602224
    X246      obj                105   G246                14
    X246      c14                  1   c15                  1
    X246      c60                  1   c80                  2
    X246      c574      1.8644067797   c1037     0.0142106483
    X246      c1432     0.0147119941   c1465     0.0111146701
    X246      c1564     1.9057787E-5   c1722     1.9635276E-5
    X246      c1731     9.2456351E-7   c1764     3.0423123E-4
    X246      c1785     0.0058097074   c1814     0.1572343944
    X246      c1866     0.0166058649   c1869     0.0886086983
    X246      c1886     0.0196667646   c1890     2.3872358775
    X246      c1892     2.0057328091   c1895     1.4465135443
    X246      c1896     0.0122948703
    X247      obj                166   G247                22
    X247      c14                  1   c15                  1
    X247      c29                  1   c60                  1
    X247      c80                  2   c574      1.8644067797
    X247      c789      0.7401212267   c1037     0.0142106483
    X247      c1432     0.0144809005   c1465     0.0111146701
    X247      c1564     2.0775086E-4   c1722     6.0598946E-4
    X247      c1731     1.7931079E-4   c1759     1.2075065909
    X247      c1764     3.9083153E-4   c1785     0.0057235222
    X247      c1814     0.1572343944   c1866     0.0166058649
    X247      c1869     0.0885337054   c1878     0.6964866119
    X247      c1886     0.0192344423   c1890     2.1285036654
    X247      c1892     2.0057328091   c1895     1.4465135443
    X247      c1896     0.0122948703   c1913     0.7246376811
    X248      obj                147   G248                26
    X248      c11                  1   c14                  1
    X248      c15                  1   c32                  1
    X248      c60                  1   c80                  3
    X248      c88                  1   c574      2.3728813559
    X248      c1037     0.0162382143   c1432     0.0146111533
    X248      c1465     0.0111146701   c1564     0.0808389143
    X248      c1662     0.6442616092   c1722     0.8206611707
    X248      c1731     0.0191082178   c1764     0.0819857892
    X248      c1785     0.0057731464   c1797     0.0139481667
    X248      c1814     0.1576272641   c1861     0.0297912573
    X248      c1866     0.0188067157   c1869     0.1000483470
    X248      c1886     0.0210919914   c1890     2.6166451056
    X248      c1892     2.5628808116   c1895     1.6897837529
    X248      c1896     0.0124780862
    X249      obj                171   G249                26
    X249      c14                  1   c15                  1
    X249      c51                  1   c52                  1
    X249      c60                  1   c80                  3
    X249      c97                  1   c574      2.3728813559
    X249      c1037     0.6403450583   c1119     1.4398937773
    X249      c1432     0.6865719967   c1465     1.7470843671
    X249      c1564     0.0871692595   c1722     6.4710413E-4
    X249      c1731     3.8563501E-4   c1764     0.0446521032
    X249      c1785      1.507924888   c1814     1.2502442701
    X249      c1866     1.6115486052   c1869     1.6219944775
    X249      c1886     0.5907715329   c1890     2.6166451056
    X249      c1892     2.5628808116   c1895     2.4194127231
    X249      c1896     1.3638994141
    X250      obj                241   G250                11
    X250      c1                   1   c14                  1
    X250      c15                  1   c60                  1
    X250      c80                  1   c574      1.8644067797
    X250      c1037     0.5919777141   c1119     0.7280271006
    X250      c1432     0.9733739458   c1465     0.9005239129
    X250      c1564     0.0021202380   c1722     7.4177610E-5
    X250      c1731     1.1145789E-4   c1764     0.0071917077
    X250      c1785     0.9958121406   c1814     0.8903901852
    X250      c1866     0.9159490450   c1869     0.8770573942
    X250      c1871     1.3147410359   c1872              6.6
    X250      c1886     0.5828573895   c1890     2.0388098318
    X250      c1892     1.6491580875   c1895     1.8154224681
    X250      c1896     0.8400738043
    X251      obj                 80   G251                 8
    X251      c60                  1   c80                  1
    X251      c574      0.6779661016   c1564     5.8732389E-7
    X251      c1764     8.5859935E-7   c1785     1.0401587E-6
    X251      c1866     4.1827115E-4   c1869     0.0139090480
    X251      c1886     0.0021518353   c1890     0.6968520914
    X251      c1892     0.7428640033   c1895     0.3243602781
    X251      c1896     2.4428790E-4
    MARK0001  'MARKER'                 'INTEND'
    Y0        obj                  4   A0                   1
    Y0        B0                   1   G0                  -1
    Y0        c797      0.1842624800   c1360     0.0446827524
    Y0        c1564     0.0593828156   c1577     0.1403686499
    Y0        c1629     0.0214945905   c1722     4.2492865E-4
    Y0        c1731     0.0016840549   c1764     0.0784908241
    Y0        c1785     0.0010951216   c1797     0.0327386122
    Y0        c1814     0.0093445099   c1861     0.0699249184
    Y0        c1866     0.0415936323   c1869     0.0316966350
    Y0        c1879     0.0140932867   c1883     0.0527532383
    Y1        obj                  4   A0                   1
    Y1        B1                   1   G1                  -1
    Y1        c104                -1   c797      0.0728950470
    Y1        c1037     6.8320424E-4   c1360     0.0446827524
    Y1        c1432     0.0010356991   c1465     8.5497462E-4
    Y1        c1564     0.0170035921   c1577     0.0555304549
    Y1        c1629     0.0214945905   c1722     1.3867504E-4
    Y1        c1731     4.2099549E-4   c1764     0.0306839103
    Y1        c1785     0.0014813809   c1797     0.0320668528
    Y1        c1814     0.0121447137   c1861     0.0684901381
    Y1        c1866     0.0422710060   c1869     0.0326344909
    Y1        c1879     0.0134350837   c1883     0.0527532383
    Y1        c1886     8.7805208E-4   c1895     0.0202302227
    Y1        c1896     8.9408296E-4
    Y2        obj                 10   A0                   1
    Y2        B2                   1   G2                  -1
    Y2        c797      0.1842624800   c985                 1
    Y2        c1360     0.0446827524   c1564     0.0722198783
    Y2        c1577     0.1403686499   c1629     0.0214945905
    Y2        c1722     5.4454840E-4   c1731     0.0259014649
    Y2        c1764     0.0858520355   c1785     0.0010951216
    Y2        c1797     0.0509884577   c1814     0.0093445099
    Y2        c1861     0.1065300272   c1866     0.0415936323
    Y2        c1869     0.0316963137   c1879     0.0140932867
    Y2        c1883     0.0527532383   c1914                1
    Y3        obj                  3   A0                   1
    Y3        B3                   1   G3                  -1
    Y3        c789      0.0333991310   c797      0.1118736485
    Y3        c1360     0.0446827524   c1564     0.0320497965
    Y3        c1577     0.1046608354   c1629     0.0214945905
    Y3        c1722     2.4277158E-4   c1731     9.1120125E-4
    Y3        c1759     0.0472338123   c1764     0.0662679505
    Y3        c1785     0.0010951216   c1797     0.0323019686
    Y3        c1814     0.0093445099   c1861     0.0689923112
    Y3        c1866     0.0415936323   c1869     0.0316923360
    Y3        c1878     0.0696486611   c1879     0.0140932867
    Y3        c1883     0.0527532383   c1913     0.0724637681
    Y4        obj                  4   A0                   1
    Y4        B4                   1   G4                  -1
    Y4        c68                 -1   c99                 -1
    Y4        c104                -1   c1360     0.0446827524
    Y4        c1398     0.0362778886   c1564     0.0602359531
    Y4        c1629     0.0214945905   c1722     0.0234648270
    Y4        c1731     0.0013814080   c1763                1
    Y4        c1764     0.0794802338   c1785     0.0010951216
    Y4        c1797     0.0316271558   c1814     0.0093445099
    Y4        c1861     0.0675510091   c1866     0.0415936323
    Y4        c1869     0.0316896323   c1879      -0.09009636
    Y4        c1883     0.0527532383   c1907     0.0154559505
    Y5        obj                  9   A0                   1
    Y5        B5                   1   G5                  -1
    Y5        c797      0.1842624800   c959      0.2783351185
    Y5        c1230     0.1440351831   c1360     0.0446827524
    Y5        c1564     0.0587922987   c1577     0.1403686499
    Y5        c1629     0.0214945905   c1691     0.0318581251
    Y5        c1722     0.0010202019   c1731     0.0038300839
    Y5        c1764     0.0782195440   c1785     0.0010951216
    Y5        c1797     0.0351832539   c1814     0.0093445099
    Y5        c1861     0.0751463179   c1866     0.0415936323
    Y5        c1869     0.0337831676   c1879     0.0140932867
    Y5        c1883     0.0527532383   c1897     0.2583582082
    Y5        c1900     0.2262352285
    Y6        obj                 10   A0                   1
    Y6        B6                   1   G6                  -1
    Y6        c797      0.1842624800   c1179     0.0407196543
    Y6        c1186     0.0541549058   c1360     0.0446827524
    Y6        c1449     0.0922010069   c1468     0.0468199903
    Y6        c1564     0.0569581608   c1577     0.1403686499
    Y6        c1629     0.0214945905   c1722     4.2613864E-4
    Y6        c1731     0.0010534221   c1764     0.0777046968
    Y6        c1771     0.0315099304   c1785     0.0010951216
    Y6        c1797     0.0327386122   c1814     0.0093445099
    Y6        c1853     0.0714379900   c1861     0.0699249184
    Y6        c1862     0.0302756519   c1866     0.0415936323
    Y6        c1869     0.0316977320   c1879     0.0140932867
    Y6        c1883     0.0527532383   c1908     0.0025155296
    Y7        obj                  9   A0                   1
    Y7        B7                   1   G7                  -1
    Y7        c47                 -1   c68                 -1
    Y7        c99                 -1   c104                -1
    Y7        c1360     0.0446827524   c1564      -0.00921029
    Y7        c1577      -0.02415250   c1629     0.0214945905
    Y7        c1722     -6.471468E-5   c1731     -1.730044E-4
    Y7        c1764     0.0011967123   c1785     0.0010951216
    Y7        c1797     0.0316271558   c1814     0.0105364778
    Y7        c1861     0.0675510091   c1866     0.0415936323
    Y7        c1869     0.0327464199   c1879      -0.19428602
    Y7        c1883     0.0527532383
    Y8        obj                  3   A0                   1
    Y8        B8                   1   G8                  -1
    Y8        c465      0.1352874859   c797      0.1842624800
    Y8        c1360     0.0759606791   c1564     0.0995938088
    Y8        c1577     0.1403686499   c1629     0.1067564662
    Y8        c1691     0.0424775001   c1722     0.0020006951
    Y8        c1731     0.0994078642   c1764     0.1059770821
    Y8        c1768     0.0917431192   c1785     0.0010951216
    Y8        c1797     0.4027885169   c1814     0.0093445099
    Y8        c1861     0.2775473100   c1866     0.0415936323
    Y8        c1869     0.0327884003   c1879     0.0140932867
    Y8        c1883     0.0896805052   c1902     1.4285714286
    Y9        obj                 10   A0                   1
    Y9        B9                   1   G9                  -1
    Y9        c797      0.1842624800   c959      0.3892165884
    Y9        c1230     0.3898861125   c1360     0.0446827524
    Y9        c1541      2.196969697   c1564     0.0644854311
    Y9        c1577     0.1403686499   c1629     0.0214945905
    Y9        c1716      2.196969697   c1722     6.6955059E-4
    Y9        c1731     0.0141476229   c1764     0.0812166632
    Y9        c1785     0.0010951216   c1797     0.0414667877
    Y9        c1813     2.3333333333   c1814     0.0093445099
    Y9        c1861     0.0885670331   c1866     0.0415936323
    Y9        c1869     0.0357346589   c1879     0.0140932867
    Y9        c1883     0.0527532383   c1897     0.4378902711
    Y9        c1900     0.3163614578
    Y10       obj                  5   A0                   1
    Y10       B10                  1   G10                 -1
    Y10       c1360     0.0446827524   c1564     7.3521894E-5
    Y10       c1629     0.0214945905   c1722     9.7910267E-7
    Y10       c1731     7.9283014E-4   c1764     0.0047233531
    Y10       c1785     0.0010951216   c1797     0.0316271558
    Y10       c1814     0.0093445099   c1861     0.0675510091
    Y10       c1866     0.0415936323   c1869     0.0316857069
    Y10       c1879     0.0140932867   c1883     0.0527532383
    Y11       obj                 10   A0                   1
    Y11       B11                  1   G11                 -1
    Y11       c797      0.1842624800   c1037     0.1003371772
    Y11       c1119     0.0036360953   c1360     0.0446827524
    Y11       c1432     0.0184402710   c1465     0.0585359758
    Y11       c1564     0.0569817932   c1577     0.1403686499
    Y11       c1629     0.0214945905   c1722     4.0925900E-4
    Y11       c1731     0.0010536456   c1764     0.0778752739
    Y11       c1785     0.0111328086   c1797     0.0327386122
    Y11       c1814     0.0516972665   c1861     0.0699249184
    Y11       c1866     0.0567779006   c1869     0.0443826527
    Y11       c1879     0.0140932867   c1883     0.0527532383
    Y11       c1886     0.0810522493   c1895     0.0277884052
    Y11       c1896     0.0159188430
    Y12       obj                  9   A0                   1
    Y12       B12                  1   G12                 -1
    Y12       c47                 -1   c68                 -1
    Y12       c99                 -1   c104                -1
    Y12       c1360     0.0446827524   c1564      -0.00928771
    Y12       c1629     0.0214945905   c1722     -6.428776E-5
    Y12       c1731     8.0218945E-6   c1764     0.0100908597
    Y12       c1785     0.0010951216   c1797     0.0316271558
    Y12       c1814     0.0093445099   c1861     0.0675510091
    Y12       c1866     0.0415936323   c1869     0.0316864605
    Y12       c1879      -0.19428602   c1883     0.0527532383
    Y13       obj                 10   A0                   1
    Y13       B13                  1   G13                 -1
    Y13       c789      0.0333991310   c797      0.0883707812
    Y13       c1360     0.0446827524   c1564     0.0553894923
    Y13       c1577     0.1403686499   c1629     0.0214945905
    Y13       c1722     4.0258609E-4   c1731     0.0010539036
    Y13       c1759     0.0472338123   c1764     0.0656284592
    Y13       c1785     0.0010951216   c1797     0.0326289787
    Y13       c1814     0.0093445099   c1861     0.0696907573
    Y13       c1866     0.0415936323   c1869     0.0316934011
    Y13       c1878     0.0696486611   c1879     0.0140932867
    Y13       c1883     0.0527532383   c1913     0.0724637681
    Y14       obj                  5   A0                   1
    Y14       B14                  1   G14                 -1
    Y14       c797      0.1842624800   c1360     0.0446827524
    Y14       c1564     0.0449898881   c1577     0.1403686499
    Y14       c1629     0.0214945905   c1662     0.0069061232
    Y14       c1722     0.0014375093   c1731     0.0024731387
    Y14       c1764     0.0668654567   c1785     0.0010951216
    Y14       c1797     0.0327064782   c1814     0.0093445099
    Y14       c1861     0.0698562850   c1866     0.0415936323
    Y14       c1869     0.0317161186   c1879     0.0140932867
    Y14       c1883     0.0527532383   c1903     0.2410518626
    Y14       c1904                1
    Y15       obj                  8   A0                   1
    Y15       B15                  1   G15                 -1
    Y15       c797      0.1842624800   c1360     0.0446827524
    Y15       c1564     0.0462820962   c1577     0.1403686499
    Y15       c1629     0.0214945905   c1722     3.3336738E-4
    Y15       c1731     0.0010679295   c1764     0.0635133395
    Y15       c1785     0.0010951216   c1797     0.0327386122
    Y15       c1814     0.0093445099   c1861     0.0699249184
    Y15       c1866     0.0415936323   c1869     0.0316914514
    Y15       c1879     0.0140932867   c1883     0.0527532383
    Y16       obj                  9   A0                   1
    Y16       B16                  1   G16                 -1
    Y16       c797      0.1842624800   c1037     0.1373035056
    Y16       c1119     0.1839864271   c1360     0.0446827524
    Y16       c1432     0.1818968246   c1465     0.2207562864
    Y16       c1564     0.0430218475   c1577     0.1046608354
    Y16       c1629     0.0214945905   c1722     3.0921328E-4
    Y16       c1731     7.8896684E-4   c1764     0.0505136460
    Y16       c1785     0.0565747189   c1797     0.0326772656
    Y16       c1814     0.1524892962   c1861     0.0697938910
    Y16       c1866     0.2180354457   c1869     0.1734733457
    Y16       c1871     0.2191235059   c1872              2.2
    Y16       c1879     0.0140932867   c1883     0.0527532383
    Y16       c1886     0.1293515635   c1895     0.0898627618
    Y16       c1896     0.1698074616
    Y17       obj                  8   A0                   1
    Y17       B17                  1   G17                 -1
    Y17       c797      0.1842624800   c1360     0.0446827524
    Y17       c1564     0.0569579547   c1577     0.1403686499
    Y17       c1629     0.0214945905   c1722     4.0761797E-4
    Y17       c1731     0.0010534221   c1764     0.0773769490
    Y17       c1785     0.0010952229   c1797     0.0327386122
    Y17       c1814     0.0093485233   c1861     0.0699249184
    Y17       c1866     0.0415974803   c1869     0.0317033214
    Y17       c1879     0.0140932867   c1883     0.0527532383
    Y17       c1886     3.9491562E-4   c1896     4.3063573E-5
    Y18       obj                  7   A1                   1
    Y18       B0                   1   G18                 -1
    Y18       c1037     0.1003371772   c1119     0.0724165282
    Y18       c1360     0.0446827524   c1432     0.0909484123
    Y18       c1465     0.1023735944   c1564     0.0025974503
    Y18       c1629     0.0214945905   c1722     7.8048953E-5
    Y18       c1731     7.0681809E-4   c1764     0.0170733230
    Y18       c1785     0.0968628054   c1797     0.0316271558
    Y18       c1814     0.0799289001   c1861     0.0675510091
    Y18       c1866     0.1011079857   c1869     0.1008358031
    Y18       c1871     0.0996015936   c1883     0.0527532383
    Y18       c1886     0.0895782892   c1895     0.0453415036
    Y18       c1896     0.0822816802
    Y19       obj                  1   A1                   1
    Y19       B1                   1   G19                 -1
    Y19       c26                 -1   c1037      -0.06796854
    Y19       c1119      -0.11156989   c1360     0.0446827524
    Y19       c1432      -0.09094841   c1465      -0.11858978
    Y19       c1564     -1.291229E-5   c1629     0.0214945905
    Y19       c1722     1.6653611E-5   c1731     -5.638363E-6
    Y19       c1764     0.0092122755   c1785      -0.13089467
    Y19       c1797     0.0316271558   c1814      -0.08846089
    Y19       c1861     0.0675510091   c1866      -0.10186357
    Y19       c1869      -0.09903860   c1871      -0.11952191
    Y19       c1872             -2.2   c1883     0.0527532383
    Y19       c1886      -0.06392514   c1895      -0.02765864
    Y19       c1896      -0.07474350
    Y20       obj                  7   A1                   1
    Y20       B2                   1   G20                 -1
    Y20       c985                 1   c1037     0.1003371772
    Y20       c1119     0.0724165282   c1360     0.0446827524
    Y20       c1432     0.0909484123   c1465     0.1023735944
    Y20       c1564     0.0154849824   c1629     0.0214945905
    Y20       c1722     1.6076853E-4   c1731     0.0248578549
    Y20       c1764     0.0187925184   c1785     0.0968628054
    Y20       c1797     0.0498770013   c1814     0.0799289001
    Y20       c1861     0.1065300272   c1866     0.1011079857
    Y20       c1869     0.1008400888   c1871     0.0996015936
    Y20       c1883     0.0527532383   c1886     0.0895782892
    Y20       c1895     0.0453415036   c1896     0.0822816802
    Y20       c1914                1
    Y21       obj                  4   A1                   1
    Y21       B3                   1   G21                 -1
    Y21       c789      0.0333991310   c1037     0.1003371772
    Y21       c1119     0.0724165282   c1360     0.0446827524
    Y21       c1432     0.0909484123   c1465     0.1023735944
    Y21       c1564     2.2409713E-4   c1629     0.0214945905
    Y21       c1722     3.0772358E-5   c1731     1.7689133E-5
    Y21       c1759     0.0472338123   c1764     0.0107670712
    Y21       c1785     0.0968628054   c1797     0.0316271558
    Y21       c1814     0.0799289001   c1861     0.0675510091
    Y21       c1866     0.1011079857   c1869     0.1008375661
    Y21       c1871     0.0996015936   c1878     0.0696486611
    Y21       c1883     0.0527532383   c1886     0.0895782892
    Y21       c1895     0.0453415036   c1896     0.0822816802
    Y21       c1913     0.0724637681
    Y22       obj                  6   A1                   1
    Y22       B4                   1   G22                 -1
    Y22       c1037     0.1003371772   c1119     0.0724165282
    Y22       c1360     0.0446827524   c1398     0.1541810266
    Y22       c1432     0.0909484123   c1465     0.1023735944
    Y22       c1564     0.1223176311   c1629     0.0214945905
    Y22       c1722     0.0995704363   c1731     0.0013841792
    Y22       c1763                1   c1764     0.1166680462
    Y22       c1785     0.0968628054   c1797     0.0316271558
    Y22       c1814     0.0799289001   c1861     0.0675510091
    Y22       c1866     0.1011079857   c1869     0.1008394047
    Y22       c1871     0.0996015936   c1883     0.0527532383
    Y22       c1886     0.0895782892   c1895     0.0453415036
    Y22       c1896     0.0822816802   c1907     0.0772797527
    Y23       obj                  7   A1                   1
    Y23       B5                   1   G23                 -1
    Y23       c959      0.2783351185   c1037     0.1003371772
    Y23       c1119     0.0724165282   c1230     0.1440351831
    Y23       c1360     0.0446827524   c1432     0.0909484123
    Y23       c1465     0.1023735944   c1564     0.0020583955
    Y23       c1629     0.0214945905   c1691     0.0318581251
    Y23       c1722     6.9078055E-4   c1731     0.0027864739
    Y23       c1764     0.0118910768   c1785     0.0968628054
    Y23       c1797     0.0340717975   c1814     0.0799289001
    Y23       c1861     0.0727724086   c1866     0.1011079857
    Y23       c1869     0.1015319395   c1871     0.0996015936
    Y23       c1883     0.0527532383   c1886     0.0895782892
    Y23       c1895     0.0453415036   c1896     0.0822816802
    Y23       c1897     0.2583582082   c1900     0.2262352285
    Y24       obj                  7   A1                   1
    Y24       B6                   1   G24                 -1
    Y24       c93                  1   c94                  1
    Y24       c110                 1   c1037     0.1003371772
    Y24       c1119     0.0797099827   c1179     0.0992994716
    Y24       c1186     0.2581161634   c1360     0.0446827524
    Y24       c1432     0.0909484123   c1449     0.2316831916
    Y24       c1465     0.1111667541   c1468     0.0468199903
    Y24       c1564     3.6183593E-4   c1629     0.0214945905
    Y24       c1722     6.8928084E-5   c1731     1.4214376E-5
    Y24       c1764     0.0108234575   c1771     0.0672020041
    Y24       c1785     0.1032022323   c1797     0.0316271558
    Y24       c1814     0.0851768612   c1853     0.1360161763
    Y24       c1861     0.0675510091   c1862     0.0302756519
    Y24       c1866     0.1091710323   c1869     0.1037456410
    Y24       c1871     0.0996015936   c1883     0.0527532383
    Y24       c1886     0.0895791623   c1895     0.0490372732
    Y24       c1896     0.0831057370   c1908     0.0084035274
    Y25       obj                  1   A1                   1
    Y25       B7                   1   G25                 -1
    Y25       c1037     0.1003371772   c1119     0.0724165282
    Y25       c1360     0.0446827524   c1432     0.0909484123
    Y25       c1465     0.1023735944   c1564     2.8921896E-4
    Y25       c1629     0.0214945905   c1722     2.4793331E-5
    Y25       c1731     6.4240558E-5   c1764     0.0107589166
    Y25       c1785     0.0968628054   c1797     0.0316271558
    Y25       c1814     0.0811208680   c1861     0.0675510091
    Y25       c1866     0.1011079857   c1869     0.1018960851
    Y25       c1871     0.0996015936   c1883     0.0527532383
    Y25       c1886     0.0895782892   c1895     0.0453415036
    Y25       c1896     0.0822816802
    Y26       obj                  4   A1                   1
    Y26       B8                   1   G26                 -1
    Y26       c465      0.1352874859   c1037     0.1003371772
    Y26       c1119     0.0724165282   c1360     0.0759606791
    Y26       c1432     0.0909484123   c1465     0.1023735944
    Y26       c1564     0.0569989908   c1629     0.1067564662
    Y26       c1691     0.0424775001   c1722     0.0017178248
    Y26       c1731     0.0983642543   c1764     0.0520710241
    Y26       c1768     0.0917431192   c1785     0.0968628054
    Y26       c1797     0.4016770605   c1814     0.0799289001
    Y26       c1861     0.2751734007   c1866     0.1011079857
    Y26       c1869     0.1017672602   c1871     0.0996015936
    Y26       c1883     0.0896805052   c1886     0.0895782892
    Y26       c1895     0.0453415036   c1896     0.0822816802
    Y26       c1902     1.4285714286
    Y27       obj                  4   A1                   1
    Y27       B9                   1   G27                 -1
    Y27       c959      0.3892165884   c1037     0.1003371772
    Y27       c1119     0.0724165282   c1230     0.3898861125
    Y27       c1360     0.0446827524   c1432     0.0909484123
    Y27       c1465     0.1023735944   c1541      2.196969697
    Y27       c1564     0.0077497534   c1629     0.0214945905
    Y27       c1716      2.196969697   c1722     2.8573103E-4
    Y27       c1731     0.0131040129   c1764     0.0148702435
    Y27       c1785     0.0968628054   c1797     0.0403553314
    Y27       c1813     2.3333333333   c1814     0.0799289001
    Y27       c1861     0.0861931238   c1866     0.1011079857
    Y27       c1869     0.1026710521   c1871     0.0996015936
    Y27       c1883     0.0527532383   c1886     0.0895782892
    Y27       c1895     0.0453415036   c1896     0.0822816802
    Y27       c1897     0.4378902711   c1900     0.3163614578
    Y28       obj                 10   A1                   1
    Y28       B10                  1   G28                 -1
    Y28       c1037     0.1003371772   c1119     0.0724165282
    Y28       c1360     0.0446827524   c1432     0.0909484123
    Y28       c1465     0.1023735944   c1564     0.0224807099
    Y28       c1629     0.0214945905   c1722     1.8269768E-4
    Y28       c1731     0.1075589026   c1764     0.0264883264
    Y28       c1785     0.0968628054   c1797     0.0484503326
    Y28       c1814     0.0799289001   c1861     0.1034828702
    Y28       c1866     0.1011079857   c1869     0.1008361264
    Y28       c1871     0.0996015936   c1883     0.0527532383
    Y28       c1886     0.0895782892   c1895     0.0453415036
    Y28       c1896     0.0822816802
    Y29       obj                  1   A1                   1
    Y29       B11                  1   G29                 -1
    Y29       c1037     0.1003371772   c1119     0.0360555743
    Y29       c1360     0.0446827524   c1432     0.0184402710
    Y29       c1465     0.0585359758   c1564     1.2999972E-4
    Y29       c1629     0.0214945905   c1722     2.3073475E-5
    Y29       c1731     4.2416662E-6   c1764     0.0104043591
    Y29       c1785     0.0382165032   c1797     0.0316271558
    Y29       c1814     0.0437732359   c1861     0.0675510091
    Y29       c1866     0.0151848581   c1869     0.0132082509
    Y29       c1871     0.0996015936   c1883     0.0527532383
    Y29       c1886     0.0810522493   c1895     0.0269165296
    Y29       c1896     0.0196879298
    Y30       obj                  7   A1                   1
    Y30       B12                  1   G30                 -1
    Y30       c1037     0.0686517528   c1119     0.0075278460
    Y30       c1360     0.0446827524   c1432     0.0909484123
    Y30       c1465     0.0330720849   c1564     2.1180037E-4
    Y30       c1629     0.0214945905   c1722     2.2150545E-5
    Y30       c1731     4.8946209E-6   c1764     0.0102465642
    Y30       c1785     0.0414128414   c1797     0.0316271558
    Y30       c1814     0.0276663891   c1861     0.0675510091
    Y30       c1866     0.0703045981   c1869     0.0678910192
    Y30       c1871     0.0996015936   c1883     0.0527532383
    Y30       c1886     0.0646686360   c1895     0.0196322810
    Y30       c1896     0.0822816802
    Y31       obj                  5   A1                   1
    Y31       B13                  1   G31                 -1
    Y31       c789      0.0925151533   c1037     0.1003371772
    Y31       c1119     0.0724165282   c1360     0.0446827524
    Y31       c1432     0.0909484123   c1465     0.1023735944
    Y31       c1564     2.2409713E-4   c1629     0.0214945905
    Y31       c1722     3.8816972E-5   c1731     1.7868499E-5
    Y31       c1759     0.0843752845   c1764     0.0107812994
    Y31       c1785     0.0968628054   c1797     0.0316271558
    Y31       c1814     0.0799289001   c1861     0.0675510091
    Y31       c1866     0.1011079857   c1869     0.1008393569
    Y31       c1871     0.0996015936   c1878     0.0696486611
    Y31       c1883     0.0527532383   c1886     0.0895782892
    Y31       c1895     0.0453415036   c1896     0.0822816802
    Y31       c1913     0.0724637681
    Y32       obj                  8   A1                   1
    Y32       B14                  1   G32                 -1
    Y32       c1037     0.1003371772   c1119     0.0724165282
    Y32       c1360     0.0446827524   c1432     0.0909484123
    Y32       c1465     0.1023735944   c1564     0.0036503495
    Y32       c1629     0.0214945905   c1662     0.0069061232
    Y32       c1722     0.0144665833   c1731     0.0023901493
    Y32       c1733     0.1401273885   c1764     0.0174417272
    Y32       c1785     0.0968628054   c1797     0.0333706767
    Y32       c1814     0.0799289001   c1861     0.0712749163
    Y32       c1866     0.1011079857   c1869     0.1008605529
    Y32       c1871     0.0996015936   c1883     0.0527532383
    Y32       c1886     0.0895782892   c1895     0.0453415036
    Y32       c1896     0.0822816802   c1903     0.2410518626
    Y32       c1904                1
    Y33       obj                  3   A1                   1
    Y33       B15                  1   G33                 -1
    Y33       c1037     0.0686517528   c1119     0.0349073336
    Y33       c1360     0.0446827524   c1432     0.0378826633
    Y33       c1465     0.0376921527   c1564     1.5778318E-4
    Y33       c1629     0.0214945905   c1722     2.5300605E-5
    Y33       c1731     8.2188352E-6   c1764     0.0105779868
    Y33       c1785     0.0447573776   c1797     0.0316271558
    Y33       c1814     0.0369499670   c1861     0.0675510091
    Y33       c1866     0.0677799846   c1869     0.0478079025
    Y33       c1883     0.0527532383   c1886     0.0501674558
    Y33       c1895     0.0190265822   c1896     0.0395096110
    Y34       obj                  3   A1                   1
    Y34       B16                  1   G34                 -1
    Y34       c26                 -1   c1037     0.0686517528
    Y34       c1119     0.0724165282   c1360     0.0446827524
    Y34       c1432     0.0909484123   c1465     0.1023735944
    Y34       c1564     1.9134501E-4   c1629     0.0214945905
    Y34       c1722     2.4662355E-5   c1731     9.8121729E-6
    Y34       c1764     0.0107588745   c1785     0.0968628054
    Y34       c1797     0.0316271558   c1814     0.0705843901
    Y34       c1861     0.0675510091   c1866     0.1011079857
    Y34       c1869     0.0987027255   c1871     0.0996015936
    Y34       c1883     0.0527532383   c1886     0.0646814076
    Y34       c1895     0.0453415036   c1896     0.0936947196
    Y35       obj                  1   A1                   1
    Y35       B17                  1   G35                 -1
    Y35       c1037     0.1003371772   c1119     0.0724165282
    Y35       c1360     0.0446827524   c1432     0.0909484123
    Y35       c1465     0.1023735944   c1564     1.9134501E-4
    Y35       c1629     0.0214945905   c1722     2.4662355E-5
    Y35       c1731     9.8121729E-6   c1764     0.0107588745
    Y35       c1785     0.0968628054   c1797     0.0316271558
    Y35       c1814     0.0799298175   c1861     0.0675510091
    Y35       c1866     0.1011079857   c1869     0.1008357640
    Y35       c1871     0.0996015936   c1883     0.0527532383
    Y35       c1886     0.0899726425   c1895     0.0453415036
    Y35       c1896     0.0822816802
    Y36       obj                 10   A2                   1
    Y36       B0                   1   G36                 -1
    Y36       c1188     0.0882723833   c1360     0.0446827524
    Y36       c1564     0.0064735713   c1629     0.0214945905
    Y36       c1722     1.3543674E-4   c1731     0.0069870289
    Y36       c1764     0.0178422392   c1785     0.0010951216
    Y36       c1797     0.0348674577   c1814     0.0093445099
    Y36       c1861     0.0744718231   c1866     0.0415936323
    Y36       c1869     0.0316916590   c1883     0.0527532383
    Y37       obj                 10   A2                   1
    Y37       B1                   1   G37                 -1
    Y37       c1037     6.8320424E-4   c1188     0.0882723833
    Y37       c1360     0.0446827524   c1432     0.0010356991
    Y37       c1465     8.5497462E-4   c1564     0.0042276225
    Y37       c1629     0.0214945905   c1722     8.2081135E-5
    Y37       c1731     0.0062875984   c1764     0.0116065706
    Y37       c1785     0.0014813809   c1797     0.0348674577
    Y37       c1814     0.0121447137   c1861     0.0744718231
    Y37       c1866     0.0422710060   c1869     0.0326321290
    Y37       c1883     0.0527532383   c1886     8.7805208E-4
    Y37       c1895     0.0202302227   c1896     8.9408296E-4
    Y38       obj                  4   A2                   1
    Y38       B2                   1   G38                 -1
    Y38       c985                 1   c1188     0.0882723833
    Y38       c1360     0.0446827524   c1564     0.0193389827
    Y38       c1629     0.0214945905   c1722     2.1658446E-4
    Y38       c1731     0.0311344249   c1764     0.0196866439
    Y38       c1785     0.0010951216   c1797     0.0531173032
    Y38       c1814     0.0093445099   c1861     0.1134508412
    Y38       c1866     0.0415936323   c1869     0.0316925158
    Y38       c1883     0.0527532383   c1914                1
    Y39       obj                 10   A2                   1
    Y39       B3                   1   G39                 -1
    Y39       c789      0.0333991310   c1188     0.0882723833
    Y39       c1360     0.0446827524   c1564     0.0042276439
    Y39       c1629     0.0214945905   c1722     8.7196756E-5
    Y39       c1731     0.0062983274   c1759     0.0472338123
    Y39       c1764     0.0116144020   c1785     0.0010951216
    Y39       c1797     0.0348674577   c1814     0.0093445099
    Y39       c1861     0.0744718231   c1866     0.0415936323
    Y39       c1869     0.0316892373   c1878     0.0696486611
    Y39       c1883     0.0527532383   c1913     0.0724637681
    Y40       obj                  3   A2                   1
    Y40       B4                   1   G40                 -1
    Y40       c1188     0.0882723833   c1360     0.0446827524
    Y40       c1398     0.1541810266   c1564     0.1263211780
    Y40       c1629     0.0214945905   c1722     0.0996278241
    Y40       c1731     0.0076607492   c1763                1
    Y40       c1764     0.1174369623   c1785     0.0010951216
    Y40       c1797     0.0348674577   c1814     0.0093445099
    Y40       c1861     0.0744718231   c1866     0.0415936323
    Y40       c1869     0.0316963883   c1883     0.0527532383
    Y40       c1907     0.0772797527
    Y41       obj                  2   A2                   1
    Y41       B5                   1   G41                 -1
    Y41       c959      0.2783351185   c1188     0.0882723833
    Y41       c1230     0.1440351831   c1360     0.0446827524
    Y41       c1564     0.0060619424   c1629     0.0214945905
    Y41       c1691     0.0318581251   c1722     7.4719933E-4
    Y41       c1731     0.0090630439   c1764     0.0126599929
    Y41       c1785     0.0010951216   c1797     0.0373120994
    Y41       c1814     0.0093445099   c1861     0.0796932226
    Y41       c1866     0.0415936323   c1869     0.0337781916
    Y41       c1883     0.0527532383   c1897     0.2583582082
    Y41       c1900     0.2262352285
    Y42       obj                  3   A2                   1
    Y42       B6                   1   G42                 -1
    Y42       c16                 -1   c64                 -1
    Y42       c90                 -1   c113                -1
    Y42       c1179      -0.06913974   c1188     0.0882723833
    Y42       c1360     0.0446827524   c1468      -0.07303918
    Y42       c1564     0.0040479272   c1629     0.0214945905
    Y42       c1722     7.7599774E-5   c1731     0.0062863822
    Y42       c1764     0.0115258276   c1771      -0.06208975
    Y42       c1785     0.0010951216   c1797     0.0348674577
    Y42       c1814     0.0093445099   c1853      -0.00803105
    Y42       c1861     0.0744718231   c1862     0.0045558920
    Y42       c1866     0.0415936323   c1869     0.0316827203
    Y42       c1883     0.0527532383   c1908      -0.00280117
    Y43       obj                  8   A2                   1
    Y43       B7                   1   G43                 -1
    Y43       c1188     0.0882723833   c1360     0.0446827524
    Y43       c1564     0.0042812622   c1629     0.0214945905
    Y43       c1722     8.2181123E-5   c1731     0.0063448402
    Y43       c1764     0.0115984334   c1785     0.0010951216
    Y43       c1797     0.0348674577   c1814     0.0105364778
    Y43       c1861     0.0744718231   c1866     0.0415936323
    Y43       c1869     0.0327477562   c1883     0.0527532383
    Y44       obj                  3   A2                   1
    Y44       B8                   1   G44                 -1
    Y44       c98                 -1   c1360     0.0379803395
    Y44       c1564     0.0149255013   c1629     0.0214945905
    Y44       c1722     1.5749119E-4   c1731     0.0096031151
    Y44       c1764     0.0161685827   c1768     0.0917431192
    Y44       c1785     0.0010951216   c1797     0.0526951742
    Y44       c1814     0.0093445099   c1861     0.0645550002
    Y44       c1866     0.0415936323   c1869     0.0316879571
    Y44       c1883     0.0316519430
    Y45       obj                  7   A2                   1
    Y45       B9                   1   G45                 -1
    Y45       c959      0.1206873142   c1230     0.0627031206
    Y45       c1360     0.0446827524   c1564     0.0036794829
    Y45       c1629     0.0214945905   c1722     1.2504363E-4
    Y45       c1731     0.0154739374   c1764     0.0116196796
    Y45       c1785     0.0010951216   c1797     0.0365940939
    Y45       c1814     0.0093445099   c1861     0.0744718231
    Y45       c1866     0.0415936323   c1869     0.0325191553
    Y45       c1883     0.0527532383   c1897     0.0232559615
    Y45       c1900     0.0980965760
    Y46       obj                  1   A2                   1
    Y46       B10                  1   G46                 -1
    Y46       c1188     0.0252206809   c1360     0.0446827524
    Y46       c1564     0.0235435813   c1629     0.0214945905
    Y46       c1722     2.1844575E-4   c1731     0.1138354726
    Y46       c1764     0.0261845145   c1785     0.0010951216
    Y46       c1797     0.0470476113   c1814     0.0093445099
    Y46       c1861     0.1004868613   c1866     0.0415936323
    Y46       c1869     0.0316876337   c1883     0.0527532383
    Y47       obj                  5   A2                   1
    Y47       B11                  1   G47                 -1
    Y47       c1037     0.1003371772   c1119     0.0036360953
    Y47       c1188     0.0882723833   c1360     0.0446827524
    Y47       c1432     0.0184402710   c1465     0.0585359758
    Y47       c1564     0.0042513697   c1629     0.0214945905
    Y47       c1722     8.4171764E-5   c1731     0.0062878411
    Y47       c1764     0.0117790084   c1785     0.0111328086
    Y47       c1797     0.0348674577   c1814     0.0516972665
    Y47       c1861     0.0744718231   c1866     0.0567779006
    Y47       c1869     0.0443776767   c1883     0.0527532383
    Y47       c1886     0.0810522493   c1895     0.0277884052
    Y47       c1896     0.0159188430
    Y48       obj                  5   A2                   1
    Y48       B12                  1   G48                 -1
    Y48       c1360     0.0446827524   c1564     1.1016102E-4
    Y48       c1629     0.0214945905   c1722     2.0951858E-5
    Y48       c1731     3.2712354E-6   c1764     0.0096162972
    Y48       c1785     0.0010951216   c1797     0.0302244345
    Y48       c1814     0.0093445099   c1861     0.0645550002
    Y48       c1866     0.0415936323   c1869     0.0316872526
    Y48       c1883     0.0527532383
    Y49       obj                  6   A2                   1
    Y49       B13                  1   G49                 -1
    Y49       c789      0.0925151533   c1188     0.0882723833
    Y49       c1360     0.0446827524   c1564     0.0042276439
    Y49       c1629     0.0214945905   c1722     9.5241370E-5
    Y49       c1731     0.0062985067   c1759     0.0843752845
    Y49       c1764     0.0116047969   c1785     0.0010951216
    Y49       c1797     0.0348674577   c1814     0.0093445099
    Y49       c1861     0.0744718231   c1866     0.0415936323
    Y49       c1869     0.0316913886   c1878     0.0696486611
    Y49       c1883     0.0527532383   c1913     0.0724637681
    Y50       obj                  1   A2                   1
    Y50       B14                  1   G50                 -1
    Y50       c1188     0.0882723833   c1360     0.0446827524
    Y50       c1564     0.0076538964   c1629     0.0214945905
    Y50       c1662     0.0069061232   c1722     0.0145234668
    Y50       c1731     0.0086707876   c1733     0.1401273885
    Y50       c1764     0.0184888448   c1785     0.0010951216
    Y50       c1797     0.0366109786   c1814     0.0093445099
    Y50       c1861     0.0781957303   c1866     0.0415936323
    Y50       c1869     0.0317250989   c1883     0.0527532383
    Y50       c1903     0.2410518626   c1904                1
    Y51       obj                  8   A2                   1
    Y51       B15                  1   G51                 -1
    Y51       c61                 -1   c1188     0.0882723833
    Y51       c1360     0.0446827524   c1564     0.0040618326
    Y51       c1629     0.0214945905   c1722     8.1473834E-5
    Y51       c1731     0.0062901667   c1764     0.0116955510
    Y51       c1785     0.0010951216   c1797     0.0348674577
    Y51       c1814     0.0093445099   c1861     0.0744718231
    Y51       c1866     0.0415936323   c1869     0.0316874330
    Y51       c1883     0.0527532383
    Y52       obj                  3   A2                   1
    Y52       B16                  1   G52                 -1
    Y52       c1037     0.1373035056   c1119     0.1839864271
    Y52       c1188     0.0882723833   c1360     0.0446827524
    Y52       c1432     0.1818968246   c1465     0.2218183501
    Y52       c1564     0.0044305381   c1629     0.0214945905
    Y52       c1722     9.0089880E-5   c1731     0.0063030445
    Y52       c1764     0.0130777281   c1785     0.2288526070
    Y52       c1797     0.0348674577   c1814     0.1677115775
    Y52       c1861     0.0744718231   c1866     0.2452411547
    Y52       c1869     0.2303700157   c1871     0.2191235059
    Y52       c1872              2.2   c1883     0.0527532383
    Y52       c1886     0.1293628152   c1895     0.0932303684
    Y52       c1896     0.1799373928
    Y53       obj                  8   A2                   1
    Y53       B17                  1   G53                 -1
    Y53       c1188     0.0882723833   c1360     0.0446827524
    Y53       c1564     0.0041948918   c1629     0.0214945905
    Y53       c1722     8.2050147E-5   c1731     0.0062871079
    Y53       c1764     0.0115277907   c1785     0.0010952229
    Y53       c1797     0.0348674577   c1814     0.0093485233
    Y53       c1861     0.0744718231   c1866     0.0415974803
    Y53       c1869     0.0316983454   c1883     0.0527532383
    Y53       c1886     3.9491562E-4   c1896     4.3063573E-5
    Y54       obj                  7   A3                   1
    Y54       B0                   1   G54                 -1
    Y54       c959      0.2081856170   c1230     0.1958963223
    Y54       c1360     0.0446827524   c1541     1.0454545455
    Y54       c1564     0.0054437407   c1629     0.0214945905
    Y54       c1716     1.0454545455   c1722     2.0848438E-4
    Y54       c1731     0.0089860565   c1764     0.0193213736
    Y54       c1785     0.0010951216   c1797     0.0383152990
    Y54       c1813                1   c1814     0.0093445099
    Y54       c1861     0.0818359111   c1866     0.0415936323
    Y54       c1869     0.0324405236   c1883     0.0527532383
    Y54       c1897     0.1990607596   c1900     0.1692165937
    Y54       c1902     1.4285714286
    Y55       obj                  1   A3                   1
    Y55       B1                   1   G55                 -1
    Y55       c959      0.2081856170   c1037     6.8320424E-4
    Y55       c1230     0.1958963223   c1360     0.0446827524
    Y55       c1432     0.0010356991   c1465     8.5497462E-4
    Y55       c1541     1.0454545455   c1564     0.0049784647
    Y55       c1629     0.0214945905   c1716     1.0454545455
    Y55       c1722     1.0514364E-4   c1731     0.0082925991
    Y55       c1764     0.0130053974   c1785     0.0014813809
    Y55       c1797     0.0382986281   c1813                1
    Y55       c1814     0.0121447137   c1861     0.0818003045
    Y55       c1866     0.0422710060   c1869     0.0333364615
    Y55       c1883     0.0527532383   c1886     8.7805208E-4
    Y55       c1895     0.0202302227   c1896     8.9408296E-4
    Y55       c1897     0.1987496863   c1900     0.1692165937
    Y56       obj                  1   A3                   1
    Y56       B2                   1   G56                 -1
    Y56       c959      0.2081856170   c985                 1
    Y56       c1230     0.1958963223   c1360     0.0446827524
    Y56       c1541     1.0454545455   c1564     0.0196052233
    Y56       c1629     0.0214945905   c1716     1.0454545455
    Y56       c1722     2.7443758E-4   c1731     0.0319489446
    Y56       c1764     0.0208375556   c1785     0.0010951216
    Y56       c1797     0.0557967299   c1813                1
    Y56       c1814     0.0093445099   c1861     0.1191737073
    Y56       c1866     0.0415936323   c1869     0.0324448108
    Y56       c1883     0.0527532383   c1897     0.1990607596
    Y56       c1900     0.1692165937   c1902     1.4285714286
    Y56       c1914                1
    Y57       obj                  1   A3                   1
    Y57       B3                   1   G57                 -1
    Y57       c79                 -1   c789      0.0333991310
    Y57       c959      0.2081856170   c1230     0.1958963223
    Y57       c1360     0.0446827524   c1541     1.0454545455
    Y57       c1564     0.0049784861   c1629     0.0214945905
    Y57       c1716     1.0454545455   c1722     1.2769713E-4
    Y57       c1731     0.0083033281   c1759     0.0472338123
    Y57       c1764     0.0130155746   c1785     0.0010951216
    Y57       c1797     0.0383152990   c1813                1
    Y57       c1814     0.0093445099   c1861     0.0818359111
    Y57       c1866     0.0415936323   c1869     0.0324423176
    Y57       c1878     0.0696486611   c1883     0.0527532383
    Y57       c1897     0.1990607596   c1900     0.1692165937
    Y57       c1902     1.4285714286   c1913     0.0724637681
    Y58       obj                 10   A3                   1
    Y58       B4                   1   G58                 -1
    Y58       c959      0.2081856170   c1230     0.1958963223
    Y58       c1360     0.0446827524   c1398     0.1541810266
    Y58       c1541     1.0454545455   c1564     0.1270720066
    Y58       c1629     0.0214945905   c1716     1.0454545455
    Y58       c1722     0.0997021514   c1731     0.0094300999
    Y58       c1763                1   c1764     0.1189165081
    Y58       c1785     0.0010951216   c1797     0.0383152990
    Y58       c1813                1   c1814     0.0093445099
    Y58       c1861     0.0818359111   c1866     0.0415936323
    Y58       c1869     0.0324441562   c1883     0.0527532383
    Y58       c1897     0.1990607596   c1900     0.1692165937
    Y58       c1902     1.4285714286   c1907     0.0772797527
    Y59       obj                  1   A3                   1
    Y59       B5                   1   G59                 -1
    Y59       c25                 -1   c79                 -1
    Y59       c127                -1   c959       -0.05129210
    Y59       c1230      -0.05279513   c1360     0.0446827524
    Y59       c1541     -1.151515151   c1564     -8.647196E-4
    Y59       c1629     0.0214945905   c1716     -1.151515151
    Y59       c1722     -9.650265E-5   c1731      -0.00402090
    Y59       c1764     0.0095146052   c1785     0.0010951216
    Y59       c1797     0.0304417543   c1813     -1.333333333
    Y59       c1814     0.0093445099   c1861     0.0650191637
    Y59       c1866     0.0415936323   c1869     0.0297904495
    Y59       c1883     0.0527532383   c1897     0.0184751727
    Y59       c1900      -0.04169104
    Y60       obj                  7   A3                   1
    Y60       B6                   1   G60                 -1
    Y60       c959      0.2081856170   c1179     0.0407196543
    Y60       c1186     0.0541549058   c1230     0.1958963223
    Y60       c1360     0.0446827524   c1449     0.0922010069
    Y60       c1468     0.0468199903   c1541     1.0454545455
    Y60       c1564     0.0051158210   c1629     0.0214945905
    Y60       c1716     1.0454545455   c1722     1.6142267E-4
    Y60       c1731     0.0082937314   c1764     0.0130450141
    Y60       c1771     0.0315099304   c1785     0.0010951216
    Y60       c1797     0.0383152990   c1813                1
    Y60       c1814     0.0093445099   c1853     0.0714379900
    Y60       c1861     0.0818359111   c1862     0.0302756519
    Y60       c1866     0.0415936323   c1869     0.0324405183
    Y60       c1883     0.0527532383   c1897     0.1990607596
    Y60       c1900     0.1692165937   c1902     1.4285714286
    Y60       c1908     0.0025155296
    Y61       obj                  6   A3                   1
    Y61       B7                   1   G61                 -1
    Y61       c959      0.2081856170   c1230     0.1958963223
    Y61       c1360     0.0446827524   c1541     1.0454545455
    Y61       c1564     0.0050436080   c1629     0.0214945905
    Y61       c1716     1.0454545455   c1722     1.5663775E-4
    Y61       c1731     0.0083498795   c1764     0.0130074201
    Y61       c1785     0.0010951216   c1797     0.0383152990
    Y61       c1813                1   c1814     0.0105364778
    Y61       c1861     0.0818359111   c1866     0.0415936323
    Y61       c1869     0.0335008366   c1883     0.0527532383
    Y61       c1897     0.1990607596   c1900     0.1692165937
    Y61       c1902     1.4285714286
    Y62       obj                  6   A3                   1
    Y62       B8                   1   G62                 -1
    Y62       c465      0.1352874859   c959      0.2081856170
    Y62       c1230     0.1958963223   c1360     0.0759606791
    Y62       c1541     1.0454545455   c1564     0.0617533799
    Y62       c1629     0.1067564662   c1691     0.0424775001
    Y62       c1716     1.0454545455   c1722     0.0017990086
    Y62       c1731     0.1012233127   c1764     0.0525630249
    Y62       c1768     0.0917431192   c1785     0.0010951216
    Y62       c1797     0.4035055730   c1813                1
    Y62       c1814     0.0093445099   c1861     0.2790788377
    Y62       c1866     0.0415936323   c1869     0.0333718901
    Y62       c1883     0.0896805052   c1897     0.1987496863
    Y62       c1900     0.1692165937   c1902     1.4285714286
    Y63       obj                  2   A3                   1
    Y63       B9                   1   G63                 -1
    Y63       c25                 -1   c79                 -1
    Y63       c127                -1   c959      0.2081856170
    Y63       c1230     0.2009588016   c1360     0.0446827524
    Y63       c1541     1.0454545455   c1564     0.0049457340
    Y63       c1629     0.0214945905   c1716     1.0454545455
    Y63       c1722     1.5317242E-4   c1731     0.0082921083
    Y63       c1764     0.0130147603   c1785     0.0010951216
    Y63       c1797     0.0383152990   c1813                1
    Y63       c1814     0.0093445099   c1861     0.0818359111
    Y63       c1866     0.0415936323   c1869     0.0317930243
    Y63       c1883     0.0527532383   c1897     0.2009383826
    Y63       c1900     0.1692165937
    Y64       obj                  5   A3                   1
    Y64       B10                  1   G64                 -1
    Y64       c959      0.2081856170   c1230     0.1958963223
    Y64       c1360     0.0446827524   c1541     1.0454545455
    Y64       c1564     0.0253270002   c1629     0.0214945905
    Y64       c1716     1.0454545455   c1722     2.5040898E-4
    Y64       c1731     0.1104179610   c1764     0.0280324092
    Y64       c1785     0.0010951216   c1797     0.0551384758
    Y64       c1813                1   c1814     0.0093445099
    Y64       c1861     0.1177677722   c1866     0.0415936323
    Y64       c1869     0.0324408469   c1883     0.0527532383
    Y64       c1897     0.1990607596   c1900     0.1692165937
    Y64       c1902     1.4285714286
    Y65       obj                  5   A3                   1
    Y65       B11                  1   G65                 -1
    Y65       c959      0.2081856170   c1037     0.1003371772
    Y65       c1119     0.0036360953   c1230     0.1958963223
    Y65       c1360     0.0446827524   c1432     0.0184402710
    Y65       c1465     0.0585359758   c1541     1.0454545455
    Y65       c1564     0.0050022119   c1629     0.0214945905
    Y65       c1716     1.0454545455   c1722     1.5862839E-4
    Y65       c1731     0.0082928418   c1764     0.0132460181
    Y65       c1785     0.0111328086   c1797     0.0383152990
    Y65       c1813                1   c1814     0.0516972665
    Y65       c1861     0.0818359111   c1866     0.0567779006
    Y65       c1869     0.0449649644   c1883     0.0527532383
    Y65       c1886     0.0810522493   c1895     0.0277884052
    Y65       c1896     0.0159188430   c1897     0.1990607596
    Y65       c1900     0.1692165937   c1902     1.4285714286
    Y66       obj                  7   A3                   1
    Y66       B12                  1   G66                 -1
    Y66       c959      0.2081856170   c1230     0.1958963223
    Y66       c1360     0.0446827524   c1541     1.0454545455
    Y66       c1564     0.0049661894   c1629     0.0214945905
    Y66       c1716     1.0454545455   c1722     1.5650678E-4
    Y66       c1731     0.0082921769   c1764     0.0130073780
    Y66       c1785     0.0010951216   c1797     0.0383152990
    Y66       c1813                1   c1814     0.0093445099
    Y66       c1861     0.0818359111   c1866     0.0415936323
    Y66       c1869     0.0324405158   c1883     0.0527532383
    Y66       c1897     0.1990607596   c1900     0.1692165937
    Y66       c1902     1.4285714286
    Y67       obj                  9   A3                   1
    Y67       B13                  1   G67                 -1
    Y67       c789      0.0925151533   c959      0.2081856170
    Y67       c1230     0.1958963223   c1360     0.0446827524
    Y67       c1541     1.0454545455   c1564     0.0049784861
    Y67       c1629     0.0214945905   c1716     1.0454545455
    Y67       c1722     1.7066139E-4   c1731     0.0083035075
    Y67       c1759     0.0843752845   c1764     0.0130298029
    Y67       c1785     0.0010951216   c1797     0.0383152990
    Y67       c1813                1   c1814     0.0093445099
    Y67       c1861     0.0818359111   c1866     0.0415936323
    Y67       c1869     0.0324441084   c1878     0.0696486611
    Y67       c1883     0.0527532383   c1897     0.1990607596
    Y67       c1900     0.1692165937   c1902     1.4285714286
    Y67       c1913     0.0724637681
    Y68       obj                  6   A3                   1
    Y68       B14                  1   G68                 -1
    Y68       c959      0.1991340685   c1230     0.1643334076
    Y68       c1360     0.0446827524   c1541                1
    Y68       c1564     0.0062585421   c1629     0.0214945905
    Y68       c1662     0.0069061232   c1716                1
    Y68       c1722     1.4899736E-4   c1731     0.0082158327
    Y68       c1733     0.1401273885   c1764     0.0188764292
    Y68       c1785     0.0010951216   c1797     0.0369435617
    Y68       c1813                1   c1814     0.0093445099
    Y68       c1861     0.0792897396   c1866     0.0415936323
    Y68       c1869     0.0323078339   c1883     0.0527532383
    Y68       c1897     0.1987496863   c1900     0.1692165937
    Y68       c1902                1   c1903     0.2410518626
    Y68       c1904                1
    Y69       obj                  3   A3                   1
    Y69       B15                  1   G69                 -1
    Y69       c959      0.2081856170   c1230     0.1958963223
    Y69       c1360     0.0446827524   c1541     1.0454545455
    Y69       c1564     0.0084416290   c1629     0.0214945905
    Y69       c1716     1.0454545455   c1722     1.5650678E-4
    Y69       c1731     0.0083073404   c1764     0.0147362066
    Y69       c1785     0.0010951216   c1797     0.0383152990
    Y69       c1813                1   c1814     0.0093445099
    Y69       c1861     0.0818359111   c1866     0.0415936323
    Y69       c1869     0.0324405723   c1883     0.0527532383
    Y69       c1897     0.1990607596   c1900     0.1692165937
    Y69       c1902     1.4285714286
    Y70       obj                  3   A3                   1
    Y70       B16                  1   G70                 -1
    Y70       c959      0.2081856170   c1037     0.1373035056
    Y70       c1119     0.1839864271   c1230     0.1958963223
    Y70       c1360     0.0446827524   c1432     0.1818968246
    Y70       c1465     0.2218183501   c1541     1.0454545455
    Y70       c1564     0.0051813803   c1629     0.0214945905
    Y70       c1716     1.0454545455   c1722     1.6454651E-4
    Y70       c1731     0.0083080452   c1764     0.0145573154
    Y70       c1785     0.2288526070   c1797     0.0383152990
    Y70       c1813                1   c1814     0.1677115775
    Y70       c1861     0.0818359111   c1866     0.2452411547
    Y70       c1869     0.2311230960   c1871     0.2191235059
    Y70       c1872              2.2   c1883     0.0527532383
    Y70       c1886     0.1293628152   c1895     0.0932303684
    Y70       c1896     0.1799373928   c1897     0.1990607596
    Y70       c1900     0.1692165937   c1902     1.4285714286
    Y71       obj                  5   A3                   1
    Y71       B17                  1   G71                 -1
    Y71       c959      0.2081856170   c1230     0.1958963223
    Y71       c1360     0.0446827524   c1541     1.0454545455
    Y71       c1564     0.0049457340   c1629     0.0214945905
    Y71       c1716     1.0454545455   c1722     1.5650678E-4
    Y71       c1731     0.0082921086   c1764     0.0130073780
    Y71       c1785     0.0010952229   c1797     0.0383152990
    Y71       c1813                1   c1814     0.0093485233
    Y71       c1861     0.0818359111   c1866     0.0415974803
    Y71       c1869     0.0324434469   c1883     0.0527532383
    Y71       c1886     3.9491562E-4   c1896     4.3063573E-5
    Y71       c1897     0.1990607596   c1900     0.1692165937
    Y71       c1902     1.4285714286
    Y72       obj                  4   A4                   1
    Y72       B0                   1   G72                 -1
    Y72       c789      0.0925151533   c1360     0.0446827524
    Y72       c1564     0.0025468153   c1629     0.0214945905
    Y72       c1722     8.8215379E-5   c1731     7.1483231E-4
    Y72       c1759     0.0843752845   c1764     0.0164280447
    Y72       c1785     0.0010951216   c1797     0.0316271558
    Y72       c1814     0.0093445099   c1861     0.0675510091
    Y72       c1866     0.0415936323   c1869     0.0316949547
    Y72       c1878     0.0696486611   c1883     0.0527532383
    Y72       c1913     0.0724637681
    Y73       obj                 10   A4                   1
    Y73       B1                   1   G73                 -1
    Y73       c789      0.0925151533   c1037     6.8320424E-4
    Y73       c1360     0.0446827524   c1432     0.0010356991
    Y73       c1465     8.5497462E-4   c1564     1.2210276E-4
    Y73       c1629     0.0214945905   c1722     3.4859770E-5
    Y73       c1731     1.4802199E-5   c1759     0.0843752845
    Y73       c1764     0.0101169346   c1785     0.0014813809
    Y73       c1797     0.0316271558   c1814     0.0121447137
    Y73       c1861     0.0675510091   c1866     0.0422710060
    Y73       c1869     0.0326355736   c1878     0.0696486611
    Y73       c1883     0.0527532383   c1886     8.7805208E-4
    Y73       c1895     0.0202302227   c1896     8.9408296E-4
    Y73       c1913     0.0724637681
    Y74       obj                  2   A4                   1
    Y74       B2                   1   G74                 -1
    Y74       c789      0.0925151533   c985                 1
    Y74       c1360     0.0446827524   c1564     0.0153838780
    Y74       c1629     0.0214945905   c1722     1.7112887E-4
    Y74       c1731     0.0248626428   c1759     0.0843752845
    Y74       c1764     0.0182644006   c1785     0.0010951216
    Y74       c1797     0.0498770013   c1814     0.0093445099
    Y74       c1861     0.1065300272   c1866     0.0415936323
    Y74       c1869     0.0316952046   c1878     0.0696486611
    Y74       c1883     0.0527532383   c1913     0.0724637681
    Y74       c1914                1
    Y75       obj                  1   A4                   1
    Y75       B3                   1   G75                 -1
    Y75       c84                 -1   c789      0.0333991310
    Y75       c1360     0.0446827524   c1564     1.2195434E-4
    Y75       c1629     0.0214945905   c1722     2.6098467E-5
    Y75       c1731     1.4420684E-5   c1759     0.0472338123
    Y75       c1764     0.0100991475   c1785     0.0010951216
    Y75       c1797     0.0316271558   c1814     0.0093445099
    Y75       c1861     0.0675510091   c1866     0.0415936323
    Y75       c1869     0.0316887252   c1878     0.0696486611
    Y75       c1883     0.0527532383   c1913     0.0724637681
    Y76       obj                  7   A4                   1
    Y76       B4                   1   G76                 -1
    Y76       c789      0.0925151533   c1360     0.0446827524
    Y76       c1398     0.1541810266   c1564     0.1222156120
    Y76       c1629     0.0214945905   c1722     0.0995806027
    Y76       c1731     0.0013889671   c1759     0.0843752845
    Y76       c1763                1   c1764     0.1160227679
    Y76       c1785     0.0010951216   c1797     0.0316271558
    Y76       c1814     0.0093445099   c1861     0.0675510091
    Y76       c1866     0.0415936323   c1869     0.0316996840
    Y76       c1878     0.0696486611   c1883     0.0527532383
    Y76       c1907     0.0772797527   c1913     0.0724637681
    Y77       obj                  8   A4                   1
    Y77       B5                   1   G77                 -1
    Y77       c789      0.0925151533   c959      0.2783351185
    Y77       c1230     0.1440351831   c1360     0.0446827524
    Y77       c1564     0.0019563765   c1629     0.0214945905
    Y77       c1691     0.0318581251   c1722     7.0094697E-4
    Y77       c1731     0.0027912618   c1759     0.0843752845
    Y77       c1764     0.0112457984   c1785     0.0010951216
    Y77       c1797     0.0340717975   c1814     0.0093445099
    Y77       c1861     0.0727724086   c1866     0.0415936323
    Y77       c1869     0.0337814873   c1878     0.0696486611
    Y77       c1883     0.0527532383   c1897     0.2583582082
    Y77       c1900     0.2262352285   c1913     0.0724637681
    Y78       obj                  1   A4                   1
    Y78       B6                   1   G78                 -1
    Y78       c64                 -1   c113                -1
    Y78       c789      0.0875118785   c1179      -0.06913974
    Y78       c1186      -0.03833025   c1360     0.0446827524
    Y78       c1449      -0.02822935   c1468      -0.03745599
    Y78       c1564     1.0950161E-4   c1629     0.0214945905
    Y78       c1722     2.9820544E-5   c1731     1.4527915E-5
    Y78       c1759     0.0428643918   c1764     0.0101112466
    Y78       c1771      -0.07013325   c1785     0.0010951216
    Y78       c1797     0.0316271558   c1814     0.0093445099
    Y78       c1853      -0.02601617   c1861     0.0675510091
    Y78       c1862      -0.05999446   c1866     0.0415936323
    Y78       c1869     0.0316860160   c1878     0.0340504565
    Y78       c1883     0.0527532383   c1908      -0.00175073
    Y78       c1913     0.0724637681
    Y79       obj                  2   A4                   1
    Y79       B7                   1   G79                 -1
    Y79       c789      0.0190544257   c1360     0.0446827524
    Y79       c1564     1.2195434E-4   c1629     0.0214945905
    Y79       c1722     2.8593457E-5   c1731     7.1863554E-5
    Y79       c1759     0.0428643918   c1764     0.0100956034
    Y79       c1785     0.0010951216   c1797     0.0316271558
    Y79       c1814     0.0105364778   c1861     0.0675510091
    Y79       c1866     0.0415936323   c1869     0.0327489744
    Y79       c1878     0.0696486611   c1883     0.0527532383
    Y79       c1913     0.0724637681
    Y80       obj                  4   A4                   1
    Y80       B8                   1   G80                 -1
    Y80       c465      0.1352874859   c789      0.0925151533
    Y80       c1360     0.0759606791   c1564     0.0568968997
    Y80       c1629     0.1067564662   c1691     0.0424775001
    Y80       c1722     0.0017281781   c1731     0.0983690422
    Y80       c1759     0.0843752845   c1764     0.0514255254
    Y80       c1768     0.0917431192   c1785     0.0010951216
    Y80       c1797     0.4016770605   c1814     0.0093445099
    Y80       c1861     0.2751734007   c1866     0.0415936323
    Y80       c1869     0.0327856826   c1878     0.0696486611
    Y80       c1883     0.0896805052   c1902     1.4285714286
    Y80       c1913     0.0724637681
    Y81       obj                  5   A4                   1
    Y81       B9                   1   G81                 -1
    Y81       c789      0.0925151533   c959      0.3892165884
    Y81       c1230     0.3898861125   c1360     0.0446827524
    Y81       c1541      2.196969697   c1564     0.0076494307
    Y81       c1629     0.0214945905   c1716      2.196969697
    Y81       c1722     2.9609696E-4   c1731     0.0131088008
    Y81       c1759     0.0843752845   c1764     0.0142249651
    Y81       c1785     0.0010951216   c1797     0.0403553314
    Y81       c1813     2.3333333333   c1814     0.0093445099
    Y81       c1861     0.0861931238   c1866     0.0415936323
    Y81       c1869     0.0357329786   c1878     0.0696486611
    Y81       c1883     0.0527532383   c1897     0.4378902711
    Y81       c1900     0.3163614578   c1913     0.0724637681
    Y82       obj                  9   A4                   1
    Y82       B10                  1   G82                 -1
    Y82       c789      0.0925151533   c1360     0.0446827524
    Y82       c1564     0.0224300748   c1629     0.0214945905
    Y82       c1722     1.9341832E-4   c1731     0.1075636905
    Y82       c1759     0.0843752845   c1764     0.0260676851
    Y82       c1785     0.0010951216   c1797     0.0484503326
    Y82       c1814     0.0093445099   c1861     0.1034828702
    Y82       c1866     0.0415936323   c1869     0.0316912430
    Y82       c1878     0.0696486611   c1883     0.0527532383
    Y82       c1913     0.0724637681
    Y83       obj                  2   A4                   1
    Y83       B11                  1   G83                 -1
    Y83       c789      0.0925151533   c1037     0.1003371772
    Y83       c1119     0.0036360953   c1360     0.0446827524
    Y83       c1432     0.0184402710   c1465     0.0585359758
    Y83       c1564     1.4580378E-4   c1629     0.0214945905
    Y83       c1722     3.6950399E-5   c1731     1.5044747E-5
    Y83       c1759     0.0843752845   c1764     0.0103522363
    Y83       c1785     0.0111328086   c1797     0.0316271558
    Y83       c1814     0.0516972665   c1861     0.0675510091
    Y83       c1866     0.0567779006   c1869     0.0443809724
    Y83       c1878     0.0696486611   c1883     0.0527532383
    Y83       c1886     0.0810522493   c1895     0.0277884052
    Y83       c1896     0.0159188430   c1913     0.0724637681
    Y84       obj                  8   A4                   1
    Y84       B12                  1   G84                 -1
    Y84       c789      0.0925151533   c1360     0.0446827524
    Y84       c1564     1.2195434E-4   c1629     0.0214945905
    Y84       c1722     3.5209611E-5   c1731     1.5581018E-5
    Y84       c1759     0.0843752845   c1764     0.0101135962
    Y84       c1785     0.0010951216   c1797     0.0316271558
    Y84       c1814     0.0093445099   c1861     0.0675510091
    Y84       c1866     0.0415936323   c1869     0.0316908803
    Y84       c1878     0.0696486611   c1883     0.0527532383
    Y84       c1913     0.0724637681
    Y85       obj                  7   A4                   1
    Y85       B13                  1   G85                 -1
    Y85       c84                 -1   c789      0.0925151533
    Y85       c1360     0.0446827524   c1564     1.2195434E-4
    Y85       c1629     0.0214945905   c1722     3.4143081E-5
    Y85       c1731     1.4600050E-5   c1759     0.0843752845
    Y85       c1764     0.0101133758   c1785     0.0010951216
    Y85       c1797     0.0316271558   c1814     0.0093445099
    Y85       c1861     0.0675510091   c1866     0.0415936323
    Y85       c1869     0.0316908803   c1878     0.0696486611
    Y85       c1883     0.0527532383   c1913     0.0724637681
    Y86       obj                  2   A4                   1
    Y86       B14                  1   G86                 -1
    Y86       c789      0.0925151533   c1360     0.0446827524
    Y86       c1564     0.0027884701   c1629     0.0214945905
    Y86       c1662     0.0069061232   c1722     0.0144715126
    Y86       c1731     0.0023954423   c1733     0.0339702760
    Y86       c1759     0.0843752845   c1764     0.0166484049
    Y86       c1785     0.0010951216   c1797     0.0333706767
    Y86       c1814     0.0093445099   c1861     0.0712749163
    Y86       c1866     0.0415936323   c1869     0.0317156563
    Y86       c1878     0.0340504565   c1883     0.0527532383
    Y86       c1904                1   c1913     0.0724637681
    Y87       obj                  8   A4                   1
    Y87       B15                  1   G87                 -1
    Y87       c789      0.0925151533   c1360     0.0446827524
    Y87       c1564     0.0035852209   c1629     0.0214945905
    Y87       c1722     6.0850629E-5   c1731     2.9543275E-5
    Y87       c1759     0.0843752845   c1764     0.0118713074
    Y87       c1785     0.0010951216   c1797     0.0316271558
    Y87       c1814     0.0093445099   c1861     0.0675510091
    Y87       c1866     0.0415936323   c1869     0.0316929933
    Y87       c1878     0.0696486611   c1883     0.0527532383
    Y87       c1913     0.0724637681
    Y88       obj                  5   A4                   1
    Y88       B16                  1   G88                 -1
    Y88       c789      0.0541127474   c1037     0.0492574844
    Y88       c1119     0.0919932135   c1360     0.0446827524
    Y88       c1465     0.0992264737   c1564     8.9253890E-5
    Y88       c1629     0.0214945905   c1722     3.0972758E-5
    Y88       c1731     1.2008351E-5   c1759     0.0339980097
    Y88       c1764     0.0105891651   c1785     0.0808900136
    Y88       c1797     0.0316271558   c1814     0.0592748645
    Y88       c1861     0.0675510091   c1866     0.0903128043
    Y88       c1869     0.0690774862   c1871     0.0996015936
    Y88       c1872                1   c1883     0.0527532383
    Y88       c1886     0.0387394798   c1895     0.0432475776
    Y88       c1896     0.0114130394
    Y89       obj                  3   A4                   1
    Y89       B17                  1   G89                 -1
    Y89       c789      0.0925151533   c1360     0.0446827524
    Y89       c1564     1.2195434E-4   c1629     0.0214945905
    Y89       c1722     3.4828782E-5   c1731     1.4600050E-5
    Y89       c1759     0.0843752845   c1764     0.0101135962
    Y89       c1785     0.0010952229   c1797     0.0316271558
    Y89       c1814     0.0093485233   c1861     0.0675510091
    Y89       c1866     0.0415974803   c1869     0.0317016411
    Y89       c1878     0.0696486611   c1883     0.0527532383
    Y89       c1886     3.9491562E-4   c1896     4.3063573E-5
    Y89       c1913     0.0724637681
    Y90       obj                  3   A5                   1
    Y90       B0                   1   G90                 -1
    Y90       c1360     0.0446827524   c1564     0.0025350220
    Y90       c1629     0.0214945905   c1722     7.5317290E-5
    Y90       c1731     7.0368286E-4   c1764     0.0164053994
    Y90       c1785     0.0010951216   c1797     0.0316271558
    Y90       c1814     0.0093445099   c1861     0.0675510091
    Y90       c1866     0.0415936323   c1869     0.0317117418
    Y90       c1883     0.0527532383
    Y91       obj                  7   A5                   1
    Y91       B1                   1   G91                 -1
    Y91       c1037     6.8320424E-4   c1360     0.0446827524
    Y91       c1432     0.0010356991   c1465     8.5497462E-4
    Y91       c1564     1.1030945E-4   c1629     0.0214945905
    Y91       c1722     2.3370680E-5   c1731     7.0486671E-6
    Y91       c1764     0.0100960007   c1785     0.0014813809
    Y91       c1797     0.0316271558   c1814     0.0121447137
    Y91       c1861     0.0675510091   c1866     0.0422710060
    Y91       c1869     0.0326567617   c1883     0.0527532383
    Y91       c1886     8.7805208E-4   c1895     0.0202302227
    Y91       c1896     8.9408296E-4
    Y92       obj                  4   A5                   1
    Y92       B2                   1   G92                 -1
    Y92       c985                 1   c1360     0.0446827524
    Y92       c1564     0.0153720846   c1629     0.0214945905
    Y92       c1722     1.4127049E-4   c1731     0.0248550898
    Y92       c1764     0.0182451739   c1785     0.0010951216
    Y92       c1797     0.0498770013   c1814     0.0093445099
    Y92       c1861     0.1065300272   c1866     0.0415936323
    Y92       c1869     0.0317171512   c1883     0.0527532383
    Y92       c1914                1
    Y93       obj                 10   A5                   1
    Y93       B3                   1   G93                 -1
    Y93       c789      0.0333991310   c1360     0.0446827524
    Y93       c1564     1.2195434E-4   c1629     0.0214945905
    Y93       c1722     2.9449694E-5   c1731     1.4420684E-5
    Y93       c1759     0.0472338123   c1764     0.0101091719
    Y93       c1785     0.0010951216   c1797     0.0316271558
    Y93       c1814     0.0093445099   c1861     0.0675510091
    Y93       c1866     0.0415936323   c1869     0.0317138688
    Y93       c1878     0.0696486611   c1883     0.0527532383
    Y93       c1913     0.0724637681
    Y94       obj                  8   A5                   1
    Y94       B4                   1   G94                 -1
    Y94       c1360     0.0446827524   c1398     0.1541810266
    Y94       c1564     0.1222016357   c1629     0.0214945905
    Y94       c1722     0.0995689843   c1731     0.0013814141
    Y94       c1763                1   c1764     0.1160005338
    Y94       c1785     0.0010951216   c1797     0.0316271558
    Y94       c1814     0.0093445099   c1861     0.0675510091
    Y94       c1866     0.0415936323   c1869     0.0317206057
    Y94       c1883     0.0527532383   c1907     0.0772797527
    Y95       obj                 10   A5                   1
    Y95       B5                   1   G95                 -1
    Y95       c959      0.2783351185   c1230     0.1440351831
    Y95       c1360     0.0446827524   c1564     0.0019445050
    Y95       c1629     0.0214945905   c1691     0.0318581251
    Y95       c1722     6.8804888E-4   c1731     0.0027837088
    Y95       c1764     0.0112231531   c1785     0.0010951216
    Y95       c1797     0.0340717975   c1814     0.0093445099
    Y95       c1861     0.0727724086   c1866     0.0415936323
    Y95       c1869     0.0337982744   c1883     0.0527532383
    Y95       c1897     0.2583582082   c1900     0.2262352285
    Y96       obj                  9   A5                   1
    Y96       B6                   1   G96                 -1
    Y96       c102                 1   c103                 1
    Y96       c110                 1   c1179     0.0407196543
    Y96       c1186     0.0541549058   c1360     0.0446827524
    Y96       c1449     0.0922010069   c1468     0.0468199903
    Y96       c1564     2.4545020E-4   c1629     0.0214945905
    Y96       c1722     3.9406287E-5   c1731     1.3243176E-5
    Y96       c1764     0.0103566947   c1771     0.0315099304
    Y96       c1785     0.0010951216   c1797     0.0316271558
    Y96       c1814     0.0093445099   c1853     0.0714379900
    Y96       c1861     0.0675510091   c1862     0.0938506773
    Y96       c1866     0.0415936323   c1869     0.0317185695
    Y96       c1883     0.0527532383   c1908     0.0025155296
    Y97       obj                  9   A5                   1
    Y97       B7                   1   G97                 -1
    Y97       c1360     0.0446827524   c1564     1.7323714E-4
    Y97       c1629     0.0214945905   c1722     2.3470667E-5
    Y97       c1731     6.0925688E-5   c1764     0.0100921304
    Y97       c1785     0.0010951216   c1797     0.0316271558
    Y97       c1814     0.0105364778   c1861     0.0675510091
    Y97       c1866     0.0415936323   c1869     0.0327476083
    Y97       c1883     0.0527532383
    Y98       obj                  6   A5                   1
    Y98       B8                   1   G98                 -1
    Y98       c465      0.1352874859   c1360     0.0759606791
    Y98       c1564     0.0568830090   c1629     0.1067564662
    Y98       c1691     0.0424775001   c1722     0.0016957556
    Y98       c1731     0.0983614892   c1764     0.0514035533
    Y98       c1768     0.0917431192   c1785     0.0010951216
    Y98       c1797     0.4016770605   c1814     0.0093445099
    Y98       c1861     0.2751734007   c1866     0.0415936323
    Y98       c1869     0.0328092379   c1883     0.0896805052
    Y98       c1902     1.4285714286
    Y99       obj                  8   A5                   1
    Y99       B9                   1   G99                 -1
    Y99       c959      0.1946082942   c1230     0.0528568391
    Y99       c1360     0.0446827524   c1541     1.5454545455
    Y99       c1564     0.0030341733   c1629     0.0214945905
    Y99       c1716     1.5454545455   c1722     2.3077366E-4
    Y99       c1731     0.0107732141   c1764     0.0130171390
    Y99       c1785     0.0010951216   c1797     0.0386460697
    Y99       c1813     2.3333333333   c1814     0.0093445099
    Y99       c1861     0.0825423892   c1866     0.0415936323
    Y99       c1869     0.0347973546   c1883     0.0527532383
    Y99       c1897     0.3062014027   c1900     0.1581807289
    Y100      obj                  9   A5                   1
    Y100      B10                  1   G100                -1
    Y100      c1360     0.0446827524   c1564     0.0224182815
    Y100      c1629     0.0214945905   c1722     1.6101084E-4
    Y100      c1731     0.1075561375   c1764     0.0260484584
    Y100      c1785     0.0010951216   c1797     0.0484503326
    Y100      c1814     0.0093445099   c1861     0.1034828702
    Y100      c1866     0.0415936323   c1869     0.0317102175
    Y100      c1883     0.0527532383
    Y101      obj                  5   A5                   1
    Y101      B11                  1   G101                -1
    Y101      c1037     0.1003371772   c1119     0.0036360953
    Y101      c1360     0.0446827524   c1432     0.0184402710
    Y101      c1465     0.0585359758   c1564     1.3399954E-4
    Y101      c1629     0.0214945905   c1722     2.5461308E-5
    Y101      c1731     7.2706286E-6   c1764     0.0103300438
    Y101      c1785     0.0111328086   c1797     0.0316271558
    Y101      c1814     0.0516972665   c1861     0.0675510091
    Y101      c1866     0.0567779006   c1869     0.0444023121
    Y101      c1883     0.0527532383   c1886     0.0810522493
    Y101      c1895     0.0277884052   c1896     0.0159188430
    Y102      obj                  5   A5                   1
    Y102      B12                  1   G102                -1
    Y102      c1360     0.0446827524   c1564     1.1016102E-4
    Y102      c1629     0.0214945905   c1722     2.3339691E-5
    Y102      c1731     8.0280710E-6   c1764     0.0100914037
    Y102      c1785     0.0010951216   c1797     0.0316271558
    Y102      c1814     0.0093445099   c1861     0.0675510091
    Y102      c1866     0.0415936323   c1869     0.0317118880
    Y102      c1883     0.0527532383
    Y103      obj                  6   A5                   1
    Y103      B13                  1   G103                -1
    Y103      c789      0.0925151533   c1360     0.0446827524
    Y103      c1564     1.2195434E-4   c1629     0.0214945905
    Y103      c1722     3.7494307E-5   c1731     1.4600050E-5
    Y103      c1759     0.0843752845   c1764     0.0101138286
    Y103      c1785     0.0010951216   c1797     0.0316271558
    Y103      c1814     0.0093445099   c1861     0.0675510091
    Y103      c1866     0.0415936323   c1869     0.0317160239
    Y103      c1878     0.0696486611   c1883     0.0527532383
    Y103      c1913     0.0724637681
    Y104      obj                  1   A5                   1
    Y104      B14                  1   G104                -1
    Y104      c100                -1   c107                -1
    Y104      c1360     0.0446827524   c1564      -0.00329507
    Y104      c1629     0.0214945905   c1662      -0.03911256
    Y104      c1722      -0.02860616   c1731     -2.689929E-4
    Y104      c1764     0.0062684100   c1785     0.0010951216
    Y104      c1797     0.0316271558   c1814     0.0093445099
    Y104      c1861     0.0675510091   c1866     0.0415936323
    Y104      c1869     0.0317006477   c1883     0.0527532383
    Y105      obj                  4   A5                   1
    Y105      B15                  1   G105                -1
    Y105      c45                 -1   c61                 -1
    Y105      c85                 -1   c1360     0.0446827524
    Y105      c1564     -7.039243E-4   c1629     0.0214945905
    Y105      c1722     -2.092157E-6   c1731     4.0458770E-6
    Y105      c1764     0.0098870897   c1785     0.0010951216
    Y105      c1797     0.0316271558   c1814     0.0093445099
    Y105      c1861     0.0675510091   c1866     0.0415936323
    Y105      c1869     0.0314034310   c1883     0.0527532383
    Y105      c1908      -0.00107737
    Y106      obj                  9   A5                   1
    Y106      B16                  1   G106                -1
    Y106      c1037     0.1373035056   c1119     0.1839864271
    Y106      c1360     0.0446827524   c1432     0.1818968246
    Y106      c1465     0.2218183501   c1564     3.1100944E-4
    Y106      c1629     0.0214945905   c1722     3.1379424E-5
    Y106      c1731     1.9091353E-5   c1764     0.0116413412
    Y106      c1785     0.2288526070   c1797     0.0316271558
    Y106      c1814     0.1677115775   c1861     0.0675510091
    Y106      c1866     0.2452411547   c1869     0.2303698676
    Y106      c1871     0.2191235059   c1872              2.2
    Y106      c1883     0.0527532383   c1886     0.1293628152
    Y106      c1895     0.0932303684   c1896     0.1799373928
    Y107      obj                  5   A5                   1
    Y107      B17                  1   G107                -1
    Y107      c1360     0.0446827524   c1564     1.1016102E-4
    Y107      c1629     0.0214945905   c1722     2.3339691E-5
    Y107      c1731     7.0471032E-6   c1764     0.0100914037
    Y107      c1785     0.0010952229   c1797     0.0316271558
    Y107      c1814     0.0093485233   c1861     0.0675510091
    Y107      c1866     0.0415974803   c1869     0.0317229808
    Y107      c1883     0.0527532383   c1886     3.9491562E-4
    Y107      c1896     4.3063573E-5
    Y108      obj                  2   A6                   1
    Y108      B0                   1   G108                -1
    Y108      c46                 -1   c70                 -1
    Y108      c123                -1   c1564     0.0024248609
    Y108      c1722     7.4338456E-5   c1731     7.0331333E-4
    Y108      c1764     0.0164053994   c1785     0.0010951216
    Y108      c1797     0.0316271558   c1814     0.0093445099
    Y108      c1861     0.0675510091   c1866     0.0415936323
    Y108      c1869     0.0316894826   c1896     4.3063573E-5
    Y109      obj                  7   A6                   1
    Y109      B1                   1   G109                -1
    Y109      c1037     6.8320424E-4   c1360     0.0446827524
    Y109      c1432     0.0010356991   c1465     8.5497462E-4
    Y109      c1564     2.4205292E-4   c1629     0.0214945905
    Y109      c1722     2.3069560E-5   c1731     7.0424907E-6
    Y109      c1764     0.0100942894   c1785     0.0014813809
    Y109      c1797     0.0316271558   c1814     0.0121447137
    Y109      c1861     0.0675510091   c1866     0.0422710060
    Y109      c1869     0.0326319831   c1883     0.0527532383
    Y109      c1886     8.7805208E-4   c1895     0.0202302227
    Y109      c1896     9.3714653E-4
    Y110      obj                 10   A6                   1
    Y110      B2                   1   G110                -1
    Y110      c985                 1   c1360     0.0446827524
    Y110      c1564     0.0155029597   c1629     0.0214945905
    Y110      c1722     1.6002683E-4   c1731     0.0248550837
    Y110      c1764     0.0182414529   c1785     0.0010951216
    Y110      c1797     0.0498770013   c1814     0.0093445099
    Y110      c1861     0.1065300272   c1866     0.0415936323
    Y110      c1869     0.0316916141   c1883     0.0527532383
    Y110      c1896     4.3063573E-5   c1914                1
    Y111      obj                 10   A6                   1
    Y111      B3                   1   G111                -1
    Y111      c789      0.0333991310   c1360     0.0446827524
    Y111      c1564     2.4207435E-4   c1629     0.0214945905
    Y111      c1722     2.7061861E-5   c1731     1.4823615E-5
    Y111      c1759     0.0472338123   c1764     0.0101005102
    Y111      c1785     0.0010951216   c1797     0.0316271558
    Y111      c1814     0.0093445099   c1861     0.0675510091
    Y111      c1866     0.0415936323   c1869     0.0316890914
    Y111      c1878     0.0696486611   c1883     0.0527532383
    Y111      c1896     4.3063573E-5   c1913     0.0724637681
    Y112      obj                  4   A6                   1
    Y112      B4                   1   G112                -1
    Y112      c1398     0.0362778886   c1564     0.0027797232
    Y112      c1722     0.0230418890   c1731     1.2226014E-5
    Y112      c1764     0.0109325327   c1785     0.0010951216
    Y112      c1797     0.0316271558   c1814     0.0093445099
    Y112      c1861     0.0675510091   c1866     0.0415936323
    Y112      c1869     0.0316873311   c1883     0.0527532383
    Y112      c1896     4.3063573E-5
    Y113      obj                 10   A6                   1
    Y113      B5                   1   G113                -1
    Y113      c959      0.2783351185   c1230     0.1440351831
    Y113      c1360     0.0446827524   c1564     0.0020763728
    Y113      c1629     0.0214945905   c1691     0.0318581251
    Y113      c1722     6.8707005E-4   c1731     0.0027837027
    Y113      c1764     0.0112231531   c1785     0.0010951216
    Y113      c1797     0.0340717975   c1814     0.0093445099
    Y113      c1861     0.0727724086   c1866     0.0415936323
    Y113      c1869     0.0337762540   c1883     0.0527532383
    Y113      c1896     4.3063573E-5   c1897     0.2583582082
    Y113      c1900     0.2262352285
    Y114      obj                  6   A6                   1
    Y114      B6                   1   G114                -1
    Y114      c1179     0.0407196543   c1186     0.0541549058
    Y114      c1360     0.0446827524   c1449     0.0922010069
    Y114      c1468     0.0468199903   c1564     3.7940924E-4
    Y114      c1629     0.0214945905   c1722     4.2569329E-5
    Y114      c1731     7.0409267E-6   c1764     0.0101575875
    Y114      c1771     0.0315099304   c1785     0.0010951216
    Y114      c1797     0.0316271558   c1814     0.0093445099
    Y114      c1853     0.0714379900   c1861     0.0675510091
    Y114      c1862     0.0302756519   c1866     0.0415936323
    Y114      c1869     0.0316919965   c1883     0.0527532383
    Y114      c1896     4.3063573E-5   c1908     0.0025155296
    Y115      obj                  8   A6                   1
    Y115      B7                   1   G115                -1
    Y115      c1360     0.0446827524   c1564     3.0719619E-4
    Y115      c1629     0.0214945905   c1722     2.3600274E-5
    Y115      c1731     6.1375040E-5   c1764     0.0100909930
    Y115      c1785     0.0010951216   c1797     0.0316271558
    Y115      c1814     0.0105364778   c1861     0.0675510091
    Y115      c1866     0.0415936323   c1869     0.0327476105
    Y115      c1883     0.0527532383   c1896     4.3063573E-5
    Y116      obj                  6   A6                   1
    Y116      B8                   1   G116                -1
    Y116      c98                 -1   c1564     1.3580034E-4
    Y116      c1629     0.0214945905   c1722     2.2307264E-5
    Y116      c1731     4.9722480E-4   c1764     0.0100516829
    Y116      c1785     0.0010951216   c1797     0.0315040817
    Y116      c1814     0.0093445099   c1861     0.0672881406
    Y116      c1866     0.0415936323   c1869     0.0316858165
    Y116      c1896     4.3063573E-5
    Y117      obj                  6   A6                   1
    Y117      B9                   1   G117                -1
    Y117      c959      0.3892165884   c1230     0.3898861125
    Y117      c1360     0.0446827524   c1541      2.196969697
    Y117      c1564     0.0077677306   c1629     0.0214945905
    Y117      c1716      2.196969697   c1722     2.8498934E-4
    Y117      c1731     0.0131012417   c1764     0.0142023198
    Y117      c1785     0.0010951216   c1797     0.0403553314
    Y117      c1813     2.3333333333   c1814     0.0093445099
    Y117      c1861     0.0861931238   c1866     0.0415936323
    Y117      c1869     0.0357277453   c1883     0.0527532383
    Y117      c1896     4.3063573E-5   c1897     0.4378902711
    Y117      c1900     0.3163614578
    Y118      obj                  6   A6                   1
    Y118      B10                  1   G118                -1
    Y118      c1360     0.0446827524   c1564     0.0224182815
    Y118      c1629     0.0214945905   c1722     1.8138199E-4
    Y118      c1731     0.1075561313   c1764     0.0259846142
    Y118      c1785     0.0010951216   c1797     0.0484503326
    Y118      c1814     0.0093445099   c1861     0.1034828702
    Y118      c1866     0.0415936323   c1869     0.0316876504
    Y118      c1883     0.0527532383   c1896     4.3063573E-5
    Y119      obj                  8   A6                   1
    Y119      B11                  1   G119                -1
    Y119      c1037     0.1003371772   c1119     0.0036360953
    Y119      c1360     0.0446827524   c1432     0.0184402710
    Y119      c1465     0.0585359758   c1564     2.6580007E-4
    Y119      c1629     0.0214945905   c1722     2.4709941E-5
    Y119      c1731     7.2644521E-6   c1764     0.0103295910
    Y119      c1785     0.0111328086   c1797     0.0316271558
    Y119      c1814     0.0516972665   c1861     0.0675510091
    Y119      c1866     0.0567779006   c1869     0.0443757391
    Y119      c1883     0.0527532383   c1886     0.0810522493
    Y119      c1895     0.0277884052   c1896     0.0159619066
    Y120      obj                  2   A6                   1
    Y120      B12                  1   G120                -1
    Y120      c1360     0.0446827524   c1564     2.2977759E-4
    Y120      c1629     0.0214945905   c1722     2.4027200E-5
    Y120      c1731     8.0218945E-6   c1764     0.0100909509
    Y120      c1785     0.0010951216   c1797     0.0316271558
    Y120      c1814     0.0093445099   c1861     0.0675510091
    Y120      c1866     0.0415936323   c1869     0.0316872897
    Y120      c1883     0.0527532383   c1896     4.3063573E-5
    Y121      obj                  3   A6                   1
    Y121      B13                  1   G121                -1
    Y121      c1564     1.1016102E-4   c1722     2.0951858E-5
    Y121      c1764     0.0100303049   c1785     0.0010951216
    Y121      c1797     0.0316271558   c1814     0.0093445099
    Y121      c1861     0.0675510091   c1866     0.0415936323
    Y121      c1869     0.0316872877   c1896     4.3063573E-5
    Y122      obj                  6   A6                   1
    Y122      B14                  1   G122                -1
    Y122      c1360     0.0446827524   c1564     0.0036683267
    Y122      c1629     0.0214945905   c1662     0.0069061232
    Y122      c1722     0.0144658416   c1731     0.0023872838
    Y122      c1733     0.1401273885   c1764     0.0169749529
    Y122      c1785     0.0010951216   c1797     0.0333706767
    Y122      c1814     0.0093445099   c1861     0.0712749163
    Y122      c1866     0.0415936323   c1869     0.0317231612
    Y122      c1883     0.0527532383   c1896     4.3063573E-5
    Y122      c1903     0.2410518626   c1904                1
    Y123      obj                  9   A6                   1
    Y123      B15                  1   G123                -1
    Y123      c1360     0.0446827524   c1564     0.0037052172
    Y123      c1629     0.0214945905   c1722     4.9755120E-5
    Y123      c1731     2.1548341E-5   c1764     0.0118487799
    Y123      c1785     0.0010951216   c1797     0.0316271558
    Y123      c1814     0.0093445099   c1861     0.0675510091
    Y123      c1866     0.0415936323   c1869     0.0316877599
    Y123      c1883     0.0527532383   c1896     4.3063573E-5
    Y124      obj                  7   A6                   1
    Y124      B16                  1   G124                -1
    Y124      c70                 -1   c1564     1.3580034E-4
    Y124      c1722     2.0951858E-5   c1764     0.0100909509
    Y124      c1785     0.0010951216   c1797     0.0316271558
    Y124      c1861     0.0675510091   c1866     0.0415936323
    Y124      c1869     0.0316872881
    Y125      obj                  5   A6                   1
    Y125      B17                  1   G125                -1
    Y125      c46                 -1   c70                 -1
    Y125      c123                -1   c1564     9.9161219E-5
    Y125      c1722     2.2049480E-5   c1731     3.2341363E-6
    Y125      c1764     0.0100909509   c1785     0.0010951216
    Y125      c1797     0.0316271558   c1814     0.0093431052
    Y125      c1861     0.0675510091   c1866     0.0415934794
    Y125      c1869     0.0316850890   c1896     4.3063573E-5
    Y126      obj                  1   A7                   1
    Y126      B0                   1   G126                -1
    Y126      c1179     0.1194231989   c1186     0.0940833415
    Y126      c1360     0.0446827524   c1449      0.104288261
    Y126      c1468     0.1089061350   c1564     0.0025359208
    Y126      c1629     0.0214945905   c1630                1
    Y126      c1722     8.0002650E-5   c1731     7.0820260E-4
    Y126      c1764     0.0164084897   c1771     0.1059029489
    Y126      c1785     0.0010951216   c1797     0.0316271558
    Y126      c1814     0.0093445099   c1853     0.0608531512
    Y126      c1861     0.0675510091   c1862     0.0372831188
    Y126      c1866     0.0415936323   c1869     0.0317010056
    Y126      c1883     0.0527532383   c1908     0.0028011758
    Y127      obj                  7   A7                   1
    Y127      B1                   1   G127                -1
    Y127      c1037     6.8320424E-4   c1179     0.0204858508
    Y127      c1186     0.0127767500   c1360     0.0446827524
    Y127      c1432     0.0010356991   c1449     0.0444078020
    Y127      c1465     8.5497462E-4   c1564     1.2241483E-4
    Y127      c1629     0.0214945905   c1722     2.1253830E-5
    Y127      c1731     7.0424907E-6   c1764     0.0100942894
    Y127      c1771     0.0124818159   c1785     0.0014813809
    Y127      c1797     0.0316271558   c1814     0.0121447137
    Y127      c1853     0.0112106402   c1861     0.0675510091
    Y127      c1866     0.0422710060   c1869     0.0326319812
    Y127      c1883     0.0527532383   c1886     8.7805208E-4
    Y127      c1895     0.0202302227   c1896     8.9408296E-4
    Y128      obj                 10   A7                   1
    Y128      B2                   1   G128                -1
    Y128      c985                 1   c1179     0.1194231989
    Y128      c1186     0.0940833415   c1360     0.0446827524
    Y128      c1449      0.104288261   c1468     0.1089061350
    Y128      c1564     0.0153837385   c1629     0.0214945905
    Y128      c1630                1   c1722     1.6389435E-4
    Y128      c1731     0.0248555986   c1764     0.0182448120
    Y128      c1771     0.1059029489   c1785     0.0010951216
    Y128      c1797     0.0498770013   c1814     0.0093445099
    Y128      c1853     0.0608531512   c1861     0.1065300272
    Y128      c1862     0.0372831188   c1866     0.0415936323
    Y128      c1869     0.0317018624   c1883     0.0527532383
    Y128      c1908     0.0028011758   c1914                1
    Y129      obj                  1   A7                   1
    Y129      B3                   1   G129                -1
    Y129      c789      0.0333991310   c1179     0.1194231989
    Y129      c1186     0.0940833415   c1360     0.0446827524
    Y129      c1449      0.104288261   c1468     0.1089061350
    Y129      c1564     1.2285316E-4   c1629     0.0214945905
    Y129      c1630                1   c1722     3.1762662E-5
    Y129      c1731     1.8940426E-5   c1759     0.0472338123
    Y129      c1764     0.0101038692   c1771     0.1059029489
    Y129      c1785     0.0010951216   c1797     0.0316271558
    Y129      c1814     0.0093445099   c1853     0.0608531512
    Y129      c1861     0.0675510091   c1862     0.0372831188
    Y129      c1866     0.0415936323   c1869     0.0316985812
    Y129      c1878     0.0696486611   c1883     0.0527532383
    Y129      c1908     0.0028011758   c1913     0.0724637681
    Y130      obj                  7   A7                   1
    Y130      B4                   1   G130                -1
    Y130      c1179     0.1194231989   c1186     0.0940833415
    Y130      c1360     0.0446827524   c1398     0.1541810266
    Y130      c1449      0.104288261   c1468     0.1089061350
    Y130      c1564     0.1222163871   c1629     0.0214945905
    Y130      c1630                1   c1722     0.0995723900
    Y130      c1731     0.0013819229   c1763                1
    Y130      c1764     0.1160032129   c1771     0.1059029489
    Y130      c1785     0.0010951216   c1797     0.0316271558
    Y130      c1814     0.0093445099   c1853     0.0608531512
    Y130      c1861     0.0675510091   c1862     0.0372831188
    Y130      c1866     0.0415936323   c1869     0.0317057349
    Y130      c1883     0.0527532383   c1907     0.0772797527
    Y130      c1908     0.0028011758
    Y131      obj                  3   A7                   1
    Y131      B5                   1   G131                -1
    Y131      c959      0.2783351185   c1179     0.1194231989
    Y131      c1186     0.0699594078   c1230     0.1440351831
    Y131      c1360     0.0446827524   c1449     0.0887122564
    Y131      c1468     0.1089061350   c1564     0.0019571516
    Y131      c1629     0.0214945905   c1630                1
    Y131      c1691     0.0318581251   c1722     6.9176524E-4
    Y131      c1731     0.0027842176   c1764     0.0112262434
    Y131      c1771     0.1014648184   c1785     0.0010951216
    Y131      c1797     0.0340717975   c1814     0.0093445099
    Y131      c1853     0.0497113654   c1861     0.0727724086
    Y131      c1862     0.0372831188   c1866     0.0415936323
    Y131      c1869     0.0337875383   c1883     0.0527532383
    Y131      c1897     0.2583582082   c1900     0.2262352285
    Y131      c1908     0.0028011758
    Y132      obj                  1   A7                   1
    Y132      B6                   1   G132                -1
    Y132      c16                 -1   c64                 -1
    Y132      c90                 -1   c113                -1
    Y132      c1179     0.0502834521   c1186     0.0557530913
    Y132      c1360     0.0446827524   c1449     0.0760589017
    Y132      c1468     0.0358669501   c1564     1.1027671E-4
    Y132      c1629     0.0214945905   c1630                1
    Y132      c1722     2.2165680E-5   c1731     7.5558617E-6
    Y132      c1764     0.0100920781   c1771     0.0357696899
    Y132      c1785     0.0010951216   c1797     0.0316271558
    Y132      c1814     0.0093445099   c1853     0.0348369740
    Y132      c1861     0.0675510091   c1862      -0.02271135
    Y132      c1866     0.0415936323   c1869     0.0316920669
    Y132      c1883     0.0527532383
    Y133      obj                 10   A7                   1
    Y133      B7                   1   G133                -1
    Y133      c1179     0.1194231989   c1186     0.0940833415
    Y133      c1360     0.0446827524   c1449      0.104288261
    Y133      c1468     0.1089061350   c1564     1.8797499E-4
    Y133      c1629     0.0214945905   c1630                1
    Y133      c1722     2.7467785E-5   c1731     6.5491851E-5
    Y133      c1764     0.0100940833   c1771     0.1059029489
    Y133      c1785     0.0010951216   c1797     0.0316271558
    Y133      c1814     0.0105364778   c1853     0.0608531512
    Y133      c1861     0.0675510091   c1862     0.0372831188
    Y133      c1866     0.0415936323   c1869     0.0327571002
    Y133      c1883     0.0527532383   c1908     0.0028011758
    Y134      obj                 10   A7                   1
    Y134      B8                   1   G134                -1
    Y134      c465      0.1352874859   c1179     0.1194231989
    Y134      c1186     0.0940833415   c1360     0.0759606791
    Y134      c1449      0.104288261   c1468     0.1089061350
    Y134      c1564     0.0568977469   c1629     0.1067564662
    Y134      c1630                1   c1691     0.0424775001
    Y134      c1722     0.0017209506   c1731     0.0983619980
    Y134      c1764     0.0514061908   c1768     0.0917431192
    Y134      c1771     0.1059029489   c1785     0.0010951216
    Y134      c1797     0.4016770605   c1814     0.0093445099
    Y134      c1853     0.0608531512   c1861     0.2751734007
    Y134      c1862     0.0372831188   c1866     0.0415936323
    Y134      c1869     0.0327939491   c1883     0.0896805052
    Y134      c1902     1.4285714286   c1908     0.0028011758
    Y135      obj                  6   A7                   1
    Y135      B9                   1   G135                -1
    Y135      c959      0.3892165884   c1179     0.1194231989
    Y135      c1186     0.0940833415   c1230     0.3898861125
    Y135      c1360     0.0446827524   c1449      0.104288261
    Y135      c1468     0.1089061350   c1541      2.196969697
    Y135      c1564     0.0076485094   c1629     0.0214945905
    Y135      c1630                1   c1716      2.196969697
    Y135      c1722     2.8885685E-4   c1731     0.0131017566
    Y135      c1764     0.0142054101   c1771     0.1059029489
    Y135      c1785     0.0010951216   c1797     0.0403553314
    Y135      c1813     2.3333333333   c1814     0.0093445099
    Y135      c1853     0.0608531512   c1861     0.0861931238
    Y135      c1862     0.0372831188   c1866     0.0415936323
    Y135      c1869     0.0357390295   c1883     0.0527532383
    Y135      c1897     0.4378902711   c1900     0.3163614578
    Y135      c1908     0.0028011758
    Y136      obj                  2   A7                   1
    Y136      B10                  1   G136                -1
    Y136      c1179     0.1194231989   c1186     0.0940833415
    Y136      c1360     0.0446827524   c1449      0.104288261
    Y136      c1468     0.1089061350   c1564     0.0224191803
    Y136      c1629     0.0214945905   c1630                1
    Y136      c1722     1.8610702E-4   c1731     0.1075566463
    Y136      c1764     0.0260431557   c1771     0.1059029489
    Y136      c1785     0.0010951216   c1797     0.0484503326
    Y136      c1814     0.0093445099   c1853     0.0608531512
    Y136      c1861     0.1034828702   c1862     0.0372831188
    Y136      c1866     0.0415936323   c1869     0.0316971422
    Y136      c1883     0.0527532383   c1908     0.0028011758
    Y137      obj                  9   A7                   1
    Y137      B11                  1   G137                -1
    Y137      c1037     0.1003371772   c1119     0.0036360953
    Y137      c1179     0.1194231989   c1186     0.0940833415
    Y137      c1360     0.0446827524   c1432     0.0184402710
    Y137      c1449      0.104288261   c1465     0.0585359758
    Y137      c1468     0.1089061350   c1564     1.4657888E-4
    Y137      c1629     0.0214945905   c1630                1
    Y137      c1722     2.8737670E-5   c1731     8.4541853E-6
    Y137      c1764     0.0103326813   c1771     0.1059029489
    Y137      c1785     0.0111328086   c1797     0.0316271558
    Y137      c1814     0.0516972665   c1853     0.0608531512
    Y137      c1861     0.0675510091   c1862     0.0372831188
    Y137      c1866     0.0567779006   c1869     0.0443870234
    Y137      c1883     0.0527532383   c1886     0.0810522493
    Y137      c1895     0.0277884052   c1896     0.0159188430
    Y137      c1908     0.0028011758
    Y138      obj                  1   A7                   1
    Y138      B12                  1   G138                -1
    Y138      c1179     0.0252868442   c1186     0.0129821342
    Y138      c1360     0.0446827524   c1564     1.1016102E-4
    Y138      c1629     0.0214945905   c1722     2.1222841E-5
    Y138      c1731     8.0218945E-6   c1764     0.0100904588
    Y138      c1771     0.0391584561   c1785     0.0010951216
    Y138      c1797     0.0316271558   c1814     0.0093445099
    Y138      c1853     0.0082538805   c1861     0.0675510091
    Y138      c1866     0.0415936323   c1869     0.0316872877
    Y138      c1883     0.0527532383
    Y139      obj                  6   A7                   1
    Y139      B13                  1   G139                -1
    Y139      c789      0.0925151533   c1179     0.1194231989
    Y139      c1186     0.0940833415   c1360     0.0446827524
    Y139      c1449     0.0996328722   c1468     0.0479063762
    Y139      c1564     1.2285316E-4   c1629     0.0214945905
    Y139      c1630                1   c1722     3.3909270E-5
    Y139      c1731     1.8465808E-5   c1759     0.0642186518
    Y139      c1764     0.0101150643   c1771     0.0929523412
    Y139      c1785     0.0010951216   c1797     0.0316271558
    Y139      c1814     0.0093445099   c1853     0.0587505334
    Y139      c1861     0.0675510091   c1862     0.0250675255
    Y139      c1866     0.0415936323   c1869     0.0317007352
    Y139      c1878     0.0696486611   c1883     0.0527532383
    Y139      c1908     0.0028011758   c1913     0.0724637681
    Y140      obj                  5   A7                   1
    Y140      B14                  1   G140                -1
    Y140      c83                  1   c88                  1
    Y140      c107                -1   c1179     0.0707693030
    Y140      c1186     0.0699594078   c1360     0.0446827524
    Y140      c1449     0.0865215314   c1468     0.0696163598
    Y140      c1564     0.0014029091   c1629     0.0214945905
    Y140      c1630                1   c1662     0.0069061232
    Y140      c1722     2.5647044E-5   c1731     2.3574516E-4
    Y140      c1733     0.0339702760   c1764     0.0148798449
    Y140      c1771     0.0895195661   c1785     0.0010951216
    Y140      c1797     0.0316271558   c1814     0.0093445099
    Y140      c1853     0.0421569873   c1861     0.0675510091
    Y140      c1862     0.0250675255   c1866     0.0415936323
    Y140      c1869     0.0317197094   c1883     0.0527532383
    Y140      c1903     0.0584368151   c1904                1
    Y140      c1908     0.0028011758
    Y141      obj                  8   A7                   1
    Y141      B15                  1   G141                -1
    Y141      c1179     0.1194231989   c1186     0.0940833415
    Y141      c1360     0.0446827524   c1449      0.104288261
    Y141      c1468     0.1089061350   c1564     0.0035859960
    Y141      c1629     0.0214945905   c1630                1
    Y141      c1722     5.3622631E-5   c1731     2.2952713E-5
    Y141      c1764     0.0118521390   c1771     0.1059029489
    Y141      c1785     0.0010951216   c1797     0.0316271558
    Y141      c1814     0.0093445099   c1853     0.0608531512
    Y141      c1861     0.0675510091   c1862     0.0372831188
    Y141      c1866     0.0415936323   c1869     0.0316990442
    Y141      c1883     0.0527532383   c1908     0.0028011758
    Y142      obj                  6   A7                   1
    Y142      B16                  1   G142                -1
    Y142      c1037     0.1373035056   c1119     0.1839864271
    Y142      c1179     0.1194231989   c1186     0.0940833415
    Y142      c1360     0.0446827524   c1432     0.1818968246
    Y142      c1449      0.104288261   c1465     0.2218183501
    Y142      c1468     0.1089061350   c1564     3.2574729E-4
    Y142      c1629     0.0214945905   c1630                1
    Y142      c1722     3.4655786E-5   c1731     2.3657517E-5
    Y142      c1764     0.0116439786   c1771     0.1059029489
    Y142      c1785     0.2288526070   c1797     0.0316271558
    Y142      c1814     0.1677115775   c1853     0.0608531512
    Y142      c1861     0.0675510091   c1862     0.0372831188
    Y142      c1866     0.2452411547   c1869     0.2303793596
    Y142      c1871     0.2191235059   c1872              2.2
    Y142      c1883     0.0527532383   c1886     0.1293628152
    Y142      c1895     0.0932303684   c1896     0.1799373928
    Y142      c1908     0.0028011758
    Y143      obj                  5   A7                   1
    Y143      B17                  1   G143                -1
    Y143      c1179     0.1194231989   c1186     0.0940833415
    Y143      c1360     0.0446827524   c1449      0.104288261
    Y143      c1468     0.1089061350   c1564     1.1105984E-4
    Y143      c1629     0.0214945905   c1630                1
    Y143      c1722     2.6853034E-5   c1731     7.7912460E-6
    Y143      c1764     0.0100940412   c1771     0.1059029489
    Y143      c1785     0.0010952229   c1797     0.0316271558
    Y143      c1814     0.0093485233   c1853     0.0608531512
    Y143      c1861     0.0675510091   c1862     0.0372831188
    Y143      c1866     0.0415974803   c1869     0.0317076920
    Y143      c1883     0.0527532383   c1886     3.9491562E-4
    Y143      c1896     4.3063573E-5   c1908     0.0028011758
    Y144      obj                 10   A8                   1
    Y144      B0                   1   G144                -1
    Y144      c1360     0.0886207923   c1564     0.0117133487
    Y144      c1629     0.0852618757   c1722     1.5953151E-4
    Y144      c1731     0.0015571277   c1764     0.0164053994
    Y144      c1785     0.0010951216   c1797     0.0316271558
    Y144      c1814     0.0093445099   c1861     0.0675510091
    Y144      c1866     0.0415936323   c1869     0.0316918810
    Y144      c1883     0.1046272560
    Y145      obj                  7   A8                   1
    Y145      B1                   1   G145                -1
    Y145      c37                 -1   c78                 -1
    Y145      c112                -1   c147                -1
    Y145      c1037     6.8320424E-4   c1360     0.0886207923
    Y145      c1432     0.0010356991   c1465     8.5497462E-4
    Y145      c1564     0.0114142761   c1629     0.0852618757
    Y145      c1722     1.5739649E-4   c1731     8.6422785E-4
    Y145      c1764     0.0099573569   c1785     0.0014813809
    Y145      c1797     0.0316271558   c1814     0.0121447137
    Y145      c1861     0.0675510091   c1866     0.0422710060
    Y145      c1869     0.0326323482   c1883     0.1046272560
    Y145      c1886     8.7805208E-4   c1895     0.0202302227
    Y145      c1896     8.9408296E-4
    Y146      obj                  4   A8                   1
    Y146      B2                   1   G146                -1
    Y146      c985                 1   c1360     0.0886207923
    Y146      c1564     0.0268738017   c1629     0.0852618757
    Y146      c1722     2.9577167E-4   c1731     0.0255610662
    Y146      c1764     0.0181245948   c1785     0.0010951216
    Y146      c1797     0.0498770013   c1814     0.0093445099
    Y146      c1861     0.1065300272   c1866     0.0415936323
    Y146      c1869     0.0316927378   c1883     0.1046272560
    Y146      c1914                1
    Y147      obj                  1   A8                   1
    Y147      B3                   1   G147                -1
    Y147      c37                 -1   c78                 -1
    Y147      c112                -1   c147                -1
    Y147      c1564     0.0112684275   c1722     1.5635530E-4
    Y147      c1731     8.6335760E-4   c1759     0.0472338123
    Y147      c1764     0.0099540184   c1785     0.0010951216
    Y147      c1797     0.0316271558   c1814     0.0093445099
    Y147      c1861     0.0675510091   c1866     0.0415936323
    Y147      c1869     0.0316874287
    Y148      obj                  1   A8                   1
    Y148      B4                   1   G148                -1
    Y148      c1360     0.0312779267   c1564     0.0027797232
    Y148      c1629     0.0351078311   c1722     2.0951858E-5
    Y148      c1731     8.3488309E-4   c1764     0.0014914577
    Y148      c1785     0.0010951216   c1797     0.0316271558
    Y148      c1814     0.0093445099   c1861     0.0675510091
    Y148      c1866     0.0415936323   c1869     0.0316873311
    Y148      c1883     0.0369272668
    Y149      obj                  1   A8                   1
    Y149      B5                   1   G149                -1
    Y149      c959      0.2783351185   c1230     0.1440351831
    Y149      c1360     0.0886207923   c1564     0.0134472148
    Y149      c1629     0.0852618757   c1691     0.0318581251
    Y149      c1722     6.8707005E-4   c1731     0.0027906262
    Y149      c1764     0.0112231531   c1785     0.0010951216
    Y149      c1797     0.0340717975   c1814     0.0093445099
    Y149      c1861     0.0727724086   c1866     0.0415936323
    Y149      c1869     0.0337784136   c1883     0.1046272560
    Y149      c1897     0.2583582082   c1900     0.2262352285
    Y150      obj                  8   A8                   1
    Y150      B6                   1   G150                -1
    Y150      c1179     0.0407196543   c1186     0.0541549058
    Y150      c1360     0.0886207923   c1449     0.0922010069
    Y150      c1468     0.0468199903   c1564     0.0117502513
    Y150      c1629     0.0852618757   c1722     1.7831416E-4
    Y150      c1731     8.6602636E-4   c1764     0.0100928576
    Y150      c1771     0.0315099304   c1785     0.0010951216
    Y150      c1797     0.0316271558   c1814     0.0093445099
    Y150      c1853     0.0714379900   c1861     0.0675510091
    Y150      c1862     0.0302756519   c1866     0.0415936323
    Y150      c1869     0.0316941561   c1883     0.1046272560
    Y150      c1908     0.0025155296
    Y151      obj                  4   A8                   1
    Y151      B7                   1   G151                -1
    Y151      c1360     0.0886207923   c1564     0.0116780382
    Y151      c1629     0.0852618757   c1722     1.5934511E-4
    Y151      c1731     9.2217447E-4   c1764     0.0100909930
    Y151      c1785     0.0010951216   c1797     0.0316271558
    Y151      c1814     0.0105364778   c1861     0.0675510091
    Y151      c1866     0.0415936323   c1869     0.0327477954
    Y151      c1883     0.1046272560
    Y152      obj                  4   A8                   1
    Y152      B8                   1   G152                -1
    Y152      c78                 -1   c98                 -1
    Y152      c112                -1   c1360     0.0312779267
    Y152      c1564     0.0114858112   c1629     0.0852618757
    Y152      c1722     1.5790339E-4   c1731     5.0215345E-4
    Y152      c1764     0.0091552486   c1785     0.0010951216
    Y152      c1797     0.0315040817   c1814     0.0093445099
    Y152      c1861     0.0672881406   c1866     0.0415936323
    Y152      c1869     0.0316874696   c1883     0.0369272668
    Y153      obj                  3   A8                   1
    Y153      B9                   1   G153                -1
    Y153      c959      0.3892165884   c1230     0.2881623277
    Y153      c1360     0.0886207923   c1541      2.196969697
    Y153      c1564     0.0191385727   c1629     0.0852618757
    Y153      c1716      2.196969697   c1722     2.6106871E-4
    Y153      c1731     0.0126766540   c1764     0.0140539822
    Y153      c1785     0.0010951216   c1797     0.0403553314
    Y153      c1814     0.0093445099   c1861     0.0861931238
    Y153      c1866     0.0415936323   c1869     0.0322641669
    Y153      c1883     0.1046272560   c1897     0.4001619347
    Y153      c1900     0.3163614578
    Y154      obj                  2   A8                   1
    Y154      B10                  1   G154                -1
    Y154      c1360     0.0886207923   c1564     0.0229654146
    Y154      c1629     0.0852618757   c1722     2.3985815E-4
    Y154      c1731     0.1075630549   c1764     0.0167948891
    Y154      c1785     0.0010951216   c1797     0.0484503326
    Y154      c1814     0.0093445099   c1861     0.1034828702
    Y154      c1866     0.0415936323   c1869     0.0316876593
    Y154      c1883     0.1046272560
    Y155      obj                  4   A8                   1
    Y155      B11                  1   G155                -1
    Y155      c1037     0.1003371772   c1119     0.0036360953
    Y155      c1360     0.0886207923   c1432     0.0184402710
    Y155      c1465     0.0585359758   c1564     0.0116366421
    Y155      c1629     0.0852618757   c1722     1.6045477E-4
    Y155      c1731     8.6513680E-4   c1764     0.0103295910
    Y155      c1785     0.0111328086   c1797     0.0316271558
    Y155      c1814     0.0516972665   c1861     0.0675510091
    Y155      c1866     0.0567779006   c1869     0.0443778987
    Y155      c1883     0.1046272560   c1886     0.0810522493
    Y155      c1895     0.0277884052   c1896     0.0159188430
    Y156      obj                  6   A8                   1
    Y156      B12                  1   G156                -1
    Y156      c112                -1   c1360     0.0886207923
    Y156      c1564     0.0116006196   c1629     0.0426309378
    Y156      c1722     1.5817060E-4   c1731     8.6447190E-4
    Y156      c1764     0.0100909509   c1785     0.0010951216
    Y156      c1797     0.0316271558   c1814     0.0093445099
    Y156      c1861     0.0675510091   c1866     0.0415936323
    Y156      c1869     0.0316874746   c1883     0.0527532383
    Y157      obj                  6   A8                   1
    Y157      B13                  1   G157                -1
    Y157      c789      0.0925151533   c1360     0.0886207923
    Y157      c1564     0.0116129164   c1629     0.0852618757
    Y157      c1722     1.6660940E-4   c1731     8.7580241E-4
    Y157      c1759     0.0843752845   c1764     0.0101133758
    Y157      c1785     0.0010951216   c1797     0.0316271558
    Y157      c1814     0.0093445099   c1861     0.0675510091
    Y157      c1866     0.0415936323   c1869     0.0316916105
    Y157      c1878     0.0696486611   c1883     0.1046272560
    Y157      c1913     0.0724637681
    Y158      obj                  8   A8                   1
    Y158      B14                  1   G158                -1
    Y158      c88                  1   c111                 1
    Y158      c1360     0.0886207923   c1564     0.0150391688
    Y158      c1629     0.0852618757   c1662     0.0069061232
    Y158      c1722     0.0146015865   c1731     0.0032480832
    Y158      c1733     0.1401273885   c1764     0.0167140970
    Y158      c1785     0.0010951216   c1797     0.0333706767
    Y158      c1814     0.0093445099   c1861     0.0712749163
    Y158      c1866     0.0415936323   c1869     0.0317253208
    Y158      c1883     0.1046272560   c1903     0.2410518626
    Y158      c1904                1
    Y159      obj                  3   A8                   1
    Y159      B15                  1   G159                -1
    Y159      c1360     0.0312779267   c1564     0.0103682644
    Y159      c1629     0.0351078311   c1722     1.5189178E-4
    Y159      c1731     8.6384350E-4   c1764     0.0100909509
    Y159      c1785     0.0010951216   c1797     0.0316271558
    Y159      c1814     0.0093445099   c1861     0.0675510091
    Y159      c1866     0.0415936323   c1869     0.0316874545
    Y159      c1883     0.0369272668
    Y160      obj                  6   A8                   1
    Y160      B16                  1   G160                -1
    Y160      c1037     0.1373035056   c1119     0.0919932135
    Y160      c1432     0.1389659929   c1465     0.1170772327
    Y160      c1564     0.0116143754   c1629     0.0852618757
    Y160      c1722     1.5990972E-4   c1731     8.7802106E-4
    Y160      c1764     0.0108896364   c1785     0.1344889542
    Y160      c1797     0.0316271558   c1814     0.1020727527
    Y160      c1861     0.0675510091   c1866     0.1956584968
    Y160      c1869     0.1827747244   c1871     0.2191235059
    Y160      c1872              2.2   c1886     0.0459732757
    Y160      c1895     0.0630557383   c1896     0.1313775361
    Y161      obj                  6   A8                   1
    Y161      B17                  1   G161                -1
    Y161      c1360     0.0886207923   c1564     0.0115801643
    Y161      c1629     0.0852618757   c1722     1.5858073E-4
    Y161      c1731     8.6440356E-4   c1764     0.0100909509
    Y161      c1785     0.0010952229   c1797     0.0316271558
    Y161      c1814     0.0093485233   c1861     0.0675510091
    Y161      c1866     0.0415974803   c1869     0.0316985674
    Y161      c1883     0.1046272560   c1886     3.9491562E-4
    Y161      c1896     4.3063573E-5
    Y162      obj                  4   A9                   1
    Y162      B0                   1   G162                -1
    Y162      c1360     0.0446827524   c1564     0.0025748806
    Y162      c1629     0.0214945905   c1691     0.0361058751
    Y162      c1712     0.0583515681   c1722     3.8125713E-4
    Y162      c1731     7.5331333E-4   c1764     0.0164177812
    Y162      c1785     0.0010951216   c1797     0.0316271558
    Y162      c1814     0.0266300205   c1861     0.0675510091
    Y162      c1866     0.0415936323   c1869     0.0332651592
    Y162      c1883     0.0527532383   c1908     0.0602252803
    Y163      obj                  7   A9                   1
    Y163      B1                   1   G163                -1
    Y163      c1037     6.8320424E-4   c1360     0.0446827524
    Y163      c1432     0.0010356991   c1465     8.5497462E-4
    Y163      c1564     1.0631776E-4   c1629     0.0214945905
    Y163      c1691     0.0361058751   c1712     0.0583515681
    Y163      c1722     2.9624241E-4   c1731     4.6444607E-5
    Y163      c1764     0.0100944347   c1785     0.0014742581
    Y163      c1797     0.0316271558   c1814     0.0106688584
    Y163      c1861     0.0675510091   c1866     0.0422449201
    Y163      c1869     0.0325481030   c1883     0.0527532383
    Y163      c1886     8.6422629E-4   c1895     2.7133929E-4
    Y163      c1896     8.9408296E-4
    Y164      obj                  1   A9                   1
    Y164      B2                   1   G164                -1
    Y164      c1360     0.0446827524   c1564     0.0153853999
    Y164      c1629     0.0214945905   c1691     0.0361058751
    Y164      c1712     0.0583515681   c1722     4.0587723E-4
    Y164      c1731     0.0248844594   c1764     0.0182543746
    Y164      c1785     0.0010951216   c1797     0.0498770013
    Y164      c1814     0.0266300205   c1861     0.1065300272
    Y164      c1866     0.0415936323   c1869     0.0324769121
    Y164      c1883     0.0527532383   c1908     0.0602252803
    Y165      obj                  3   A9                   1
    Y165      B3                   1   G165                -1
    Y165      c789      0.0333991310   c1360     0.0446827524
    Y165      c1564     1.6181300E-4   c1629     0.0214945905
    Y165      c1691     0.0361058751   c1712     0.0583515681
    Y165      c1722     3.3538953E-4   c1731     6.4051154E-5
    Y165      c1759     0.0472338123   c1764     0.0101305665
    Y165      c1785     0.0010951216   c1797     0.0316271558
    Y165      c1814     0.0266300205   c1861     0.0675510091
    Y165      c1866     0.0415936323   c1869     0.0332672862
    Y165      c1878     0.0696486611   c1883     0.0527532383
    Y165      c1908     0.0602252803   c1913     0.0724637681
    Y166      obj                  3   A9                   1
    Y166      B4                   1   G166                -1
    Y166      c1360     0.0446827524   c1398     0.1541810266
    Y166      c1564     0.1222223967   c1629     0.0214945905
    Y166      c1691     0.0361058751   c1712     0.0583515681
    Y166      c1722     0.0998749241   c1731     0.0014107837
    Y166      c1763                1   c1764     0.1160129156
    Y166      c1785     0.0010951216   c1797     0.0316271558
    Y166      c1814     0.0266300205   c1861     0.0675510091
    Y166      c1866     0.0415936323   c1869     0.0332740231
    Y166      c1883     0.0527532383   c1907     0.0772797527
    Y166      c1908     0.0602252803
    Y167      obj                  1   A9                   1
    Y167      B5                   1   G167                -1
    Y167      c1360     0.0446827524   c1564     6.6996310E-4
    Y167      c1629     0.0214945905   c1712     0.0583515681
    Y167      c1722     9.3013199E-5   c1731     3.6416686E-5
    Y167      c1764     0.0100302489   c1785     0.0010951216
    Y167      c1797     0.0316271558   c1814     0.0266300205
    Y167      c1861     0.0675510091   c1866     0.0415936323
    Y167      c1869     0.0316872754   c1883     0.0527532383
    Y167      c1908     0.0602252803
    Y168      obj                  3   A9                   1
    Y168      B6                   1   G168                -1
    Y168      c90                 -1   c113                -1
    Y168      c1360     0.0446827524   c1449     0.0108337140
    Y168      c1468      -0.00780333   c1564     1.1221013E-4
    Y168      c1629     0.0214945905   c1691     0.0361058751
    Y168      c1712     0.0583515681   c1722     3.0810963E-4
    Y168      c1731     5.3241787E-5   c1764     0.0101017657
    Y168      c1771      -0.00111664   c1785     0.0010951216
    Y168      c1797     0.0316271558   c1814     0.0266300205
    Y168      c1853     8.7789870E-4   c1861     0.0675510091
    Y168      c1866     0.0415936323   c1869     0.0324762071
    Y168      c1883     0.0527532383   c1908     0.0040645014
    Y169      obj                  3   A9                   1
    Y169      B7                   1   G169                -1
    Y169      c109                -1   c1360     0.0446827524
    Y169      c1564     1.4532981E-4   c1629     0.0214945905
    Y169      c1691      -0.02256617   c1712      -0.03646973
    Y169      c1722     -1.408708E-4   c1731     2.9896596E-5
    Y169      c1764     0.0100823938   c1785     0.0010951216
    Y169      c1797     0.0316271558   c1814     -2.669662E-4
    Y169      c1861     0.0675510091   c1866     0.0415936323
    Y169      c1869     0.0322545332   c1883     0.0527532383
    Y169      c1908      -0.03764080
    Y170      obj                  5   A9                   1
    Y170      B8                   1   G170                -1
    Y170      c465      0.1352874859   c1360     0.0759606791
    Y170      c1564     0.0568986475   c1629     0.1067564662
    Y170      c1691     0.0361058751   c1712     0.0583515681
    Y170      c1722     7.0408014E-4   c1731     0.0931156843
    Y170      c1764     0.0448749426   c1768     0.0917431192
    Y170      c1785     0.0010951216   c1797     0.1436331670
    Y170      c1814     0.0266300205   c1861     0.2350760625
    Y170      c1866     0.0415936323   c1869     0.0331377250
    Y170      c1883     0.0896805052   c1908     0.0602252803
    Y171      obj                  9   A9                   1
    Y171      B9                   1   G171                -1
    Y171      c959      0.1946082942   c1230     0.2997235997
    Y171      c1360     0.0446827524   c1541     1.2196969697
    Y171      c1564     0.0062179762   c1629     0.0214945905
    Y171      c1691     0.0361058751   c1712     0.0583515681
    Y171      c1722     5.4801530E-4   c1731     0.0108333906
    Y171      c1764     0.0133771719   c1785     0.0010951216
    Y171      c1797     0.0386460697   c1814     0.0266300205
    Y171      c1861     0.0811851221   c1866     0.0415936323
    Y171      c1869     0.0340211154   c1883     0.0527532383
    Y171      c1897     0.3977618199   c1900     0.1416970007
    Y171      c1908     0.0602252803
    Y172      obj                  9   A9                   1
    Y172      B10                  1   G172                -1
    Y172      c1360     0.0446827524   c1564     0.0224581402
    Y172      c1629     0.0214945905   c1691     0.0361058751
    Y172      c1712     0.0583515681   c1722     4.5580838E-4
    Y172      c1731     0.1075855071   c1764     0.0260698530
    Y172      c1785     0.0010951216   c1797     0.0484503326
    Y172      c1814     0.0266300205   c1861     0.1034828702
    Y172      c1866     0.0415936323   c1869     0.0332636348
    Y172      c1883     0.0527532383   c1908     0.0602252803
    Y173      obj                  2   A9                   1
    Y173      B11                  1   G173                -1
    Y173      c1119     0.0036360953   c1360     0.0446827524
    Y173      c1432     6.3570022E-4   c1465     0.0433185284
    Y173      c1564     1.0613221E-4   c1629     0.0214945905
    Y173      c1712     0.0583515681   c1722     9.0485180E-5
    Y173      c1731     3.7199564E-6   c1764     0.0102285862
    Y173      c1785     0.0044617932   c1797     0.0316271558
    Y173      c1814     0.0129902340   c1861     0.0675510091
    Y173      c1866     0.0453941497   c1869     0.0345278019
    Y173      c1883     0.0527532383   c1886     7.2432231E-7
    Y173      c1895     0.0018424973   c1896     0.0014140901
    Y174      obj                  6   A9                   1
    Y174      B12                  1   G174                -1
    Y174      c1360     0.0446827524   c1564     1.5001968E-4
    Y174      c1629     0.0214945905   c1691     0.0361058751
    Y174      c1712     0.0583515681   c1722     3.2927953E-4
    Y174      c1731     5.2901705E-5   c1764     0.0101037855
    Y174      c1785     0.0010951216   c1797     0.0316271558
    Y174      c1814     0.0266300205   c1861     0.0675510091
    Y174      c1866     0.0415936323   c1869     0.0332653054
    Y174      c1883     0.0527532383   c1908     0.0602252803
    Y175      obj                  8   A9                   1
    Y175      B13                  1   G175                -1
    Y175      c789      0.0182431545   c1360     0.0446827524
    Y175      c1564     1.0625379E-4   c1629     0.0214945905
    Y175      c1712     0.0583515681   c1722     9.5180312E-5
    Y175      c1731     3.4374945E-6   c1759     0.0325983763
    Y175      c1764     0.0100954379   c1785     0.0010951216
    Y175      c1797     0.0316271558   c1814     0.0266300205
    Y175      c1861     0.0675510091   c1866     0.0415936323
    Y175      c1869     0.0316878403   c1883     0.0527532383
    Y176      obj                  2   A9                   1
    Y176      B14                  1   G176                -1
    Y176      c100                -1   c107                -1
    Y176      c109                -1   c1360     0.0446827524
    Y176      c1564     -6.487873E-4   c1629     0.0214945905
    Y176      c1662      -0.00424992   c1691      -0.02256617
    Y176      c1712      -0.03646973   c1722     -1.412201E-4
    Y176      c1731     -1.265710E-5   c1764     0.0096675275
    Y176      c1785     0.0010951216   c1797     0.0316271558
    Y176      c1814      -0.00145893   c1861     0.0675510091
    Y176      c1866     0.0415936323   c1869     0.0312149341
    Y176      c1883     0.0527532383   c1908      -0.03764080
    Y177      obj                  4   A9                   1
    Y177      B15                  1   G177                -1
    Y177      c45                 -1   c1360     0.0446827524
    Y177      c1564     7.3487373E-5   c1629     0.0214945905
    Y177      c1722     9.0743882E-5   c1731     6.6536269E-6
    Y177      c1764     0.0100076860   c1785     0.0010951216
    Y177      c1797     0.0316271558   c1814     0.0093445099
    Y177      c1861     0.0675510091   c1866     0.0415936323
    Y177      c1869     0.0316872871   c1883     0.0527532383
    Y177      c1908      -0.00107737
    Y178      obj                  3   A9                   1
    Y178      B16                  1   G178                -1
    Y178      c1037     0.1373035056   c1119     0.1839864271
    Y178      c1360     0.0446827524   c1432     0.1818968246
    Y178      c1465     0.2218183501   c1564     3.3177043E-4
    Y178      c1629     0.0214945905   c1691     0.0361058751
    Y178      c1712     0.0583515681   c1722     3.3731926E-4
    Y178      c1731     6.8657762E-5   c1764     0.0116537229
    Y178      c1785     0.2288526070   c1797     0.0316271558
    Y178      c1814     0.1849970881   c1861     0.0675510091
    Y178      c1866     0.2452411547   c1869     0.2311587873
    Y178      c1871     0.2191235059   c1872              2.2
    Y178      c1883     0.0527532383   c1886     0.1293628152
    Y178      c1895     0.0932303684   c1896     0.1799373928
    Y178      c1908     0.0602252803
    Y179      obj                  6   A9                   1
    Y179      B17                  1   G179                -1
    Y179      c1360     0.0446827524   c1564     1.5001968E-4
    Y179      c1629     0.0214945905   c1691     0.0361058751
    Y179      c1712     0.0583515681   c1722     3.2927953E-4
    Y179      c1731     5.2901973E-5   c1764     0.0101037855
    Y179      c1785     0.0010952229   c1797     0.0316271558
    Y179      c1814     0.0266340339   c1861     0.0675510091
    Y179      c1866     0.0415974803   c1869     0.0332763982
    Y179      c1883     0.0527532383   c1886     3.9491562E-4
    Y179      c1896     4.3063573E-5   c1908     0.0602252803
    Y180      obj                  4   A10                  1
    Y180      B0                   1   G180                -1
    Y180      c17                 -1   c22                 -1
    Y180      c1360     0.0446827524   c1398      -0.15418102
    Y180      c1564      -0.10997022   c1629     0.0214945905
    Y180      c1662      -0.12709922   c1722      -0.09101718
    Y180      c1731     7.0409267E-6   c1764      -0.04528265
    Y180      c1785     0.0010951216   c1797     0.0316271558
    Y180      c1814     0.0093445099   c1861     0.0675510091
    Y180      c1866     0.0415936323   c1869     0.0316832049
    Y180      c1880               -1   c1883     0.0527532383
    Y180      c1907      -0.07727975
    Y181      obj                  1   A10                  1
    Y181      B1                   1   G181                -1
    Y181      c1037     6.8320424E-4   c1360     0.0446827524
    Y181      c1432     0.0010356991   c1465     8.5497462E-4
    Y181      c1564     0.0051596904   c1629     0.0214945905
    Y181      c1662     0.0460186863   c1722     0.0370867331
    Y181      c1731     4.6424959E-4   c1764     0.0145925942
    Y181      c1785     0.0014813809   c1797     0.0316271558
    Y181      c1814     0.0121447137   c1861     0.0675510091
    Y181      c1866     0.0422710060   c1869     0.0326415567
    Y181      c1883     0.0527532383   c1886     8.7805208E-4
    Y181      c1895     0.0202302227   c1896     8.9408296E-4
    Y182      obj                  1   A10                  1
    Y182      B2                   1   G182                -1
    Y182      c1360     0.0446827524   c1564     0.0171725413
    Y182      c1629     0.0214945905   c1662     0.0284877582
    Y182      c1722     0.0085943704   c1731     0.0251495264
    Y182      c1764     0.0200375984   c1785     0.0010951216
    Y182      c1797     0.0491085868   c1814     0.0093445099
    Y182      c1861     0.1048888054   c1866     0.0415936323
    Y182      c1869     0.0316970405   c1883     0.0527532383
    Y183      obj                  2   A10                  1
    Y183      B3                   1   G183                -1
    Y183      c789      0.0333991310   c1360     0.0446827524
    Y183      c1564     0.0039467436   c1629     0.0214945905
    Y183      c1662     0.0460186863   c1722     0.0084825496
    Y183      c1731     1.4773360E-4   c1759     0.0472338123
    Y183      c1764     0.0145971689   c1785     0.0010951216
    Y183      c1797     0.0316271558   c1814     0.0093445099
    Y183      c1861     0.0675510091   c1866     0.0415936323
    Y183      c1869     0.0316934669   c1878     0.0696486611
    Y183      c1883     0.0527532383   c1913     0.0724637681
    Y184      obj                  1   A10                  1
    Y184      B4                   1   G184                -1
    Y184      c17                 -1   c1360     0.0446827524
    Y184      c1564     0.0121560435   c1629     0.0214945905
    Y184      c1662      -0.12709922   c1722     0.0084764794
    Y184      c1731     7.8871558E-4   c1763                1
    Y184      c1764     0.0360113465   c1785     0.0010951216
    Y184      c1797     0.0316271558   c1814     0.0093445099
    Y184      c1861     0.0675510091   c1866     0.0415936323
    Y184      c1869     0.0316887785   c1880               -1
    Y184      c1883     0.0527532383
    Y185      obj                  4   A10                  1
    Y185      B5                   1   G185                -1
    Y185      c959      0.2783351185   c1230     0.1440351831
    Y185      c1360     0.0446827524   c1564     0.0069938861
    Y185      c1629     0.0214945905   c1662     0.0460186863
    Y185      c1691     0.0318581251   c1722     0.0372827230
    Y185      c1731     0.0030781454   c1764     0.0157214580
    Y185      c1785     0.0010951216   c1797     0.0340717975
    Y185      c1814     0.0093445099   c1861     0.0727724086
    Y185      c1866     0.0415936323   c1869     0.0337855656
    Y185      c1883     0.0527532383   c1897     0.2583582082
    Y185      c1900     0.2262352285
    Y186      obj                  6   A10                  1
    Y186      B6                   1   G186                -1
    Y186      c1179     0.0407196543   c1186     0.0541549058
    Y186      c1360     0.0446827524   c1449     0.0922010069
    Y186      c1468     0.0468199903   c1564     0.0051597481
    Y186      c1629     0.0214945905   c1662     0.0460186863
    Y186      c1722     0.0371052527   c1731     4.6492130E-4
    Y186      c1764     0.0145908790   c1771     0.0315099304
    Y186      c1785     0.0010951216   c1797     0.0316271558
    Y186      c1814     0.0093445099   c1853     0.0714379900
    Y186      c1861     0.0675510091   c1862     0.0302756519
    Y186      c1866     0.0415936323   c1869     0.0316984588
    Y186      c1883     0.0527532383   c1908     0.0025155296
    Y187      obj                  8   A10                  1
    Y187      B7                   1   G187                -1
    Y187      c1360     0.0446827524   c1564     0.0051595420
    Y187      c1629     0.0214945905   c1662     0.0460186863
    Y187      c1722     0.0370867977   c1731     5.2131094E-4
    Y187      c1764     0.0145892557   c1785     0.0010951216
    Y187      c1797     0.0316271558   c1814     0.0105364778
    Y187      c1861     0.0675510091   c1866     0.0415936323
    Y187      c1869     0.0327571830   c1883     0.0527532383
    Y188      obj                  2   A10                  1
    Y188      B8                   1   G188                -1
    Y188      c465      0.1352874859   c1360     0.0759606791
    Y188      c1564     0.0607216374   c1629     0.1067564662
    Y188      c1662     0.0460186863   c1691     0.0424775001
    Y188      c1722     0.0087842463   c1731     0.0981158350
    Y188      c1764     0.0559011219   c1768     0.0917431192
    Y188      c1785     0.0010951216   c1797     0.4016770605
    Y188      c1814     0.0093445099   c1861     0.2751734007
    Y188      c1866     0.0415936323   c1869     0.0326283394
    Y188      c1883     0.0896805052   c1902     1.4285714286
    Y189      obj                  4   A10                  1
    Y189      B9                   1   G189                -1
    Y189      c959      0.3892165884   c1230     0.3898861125
    Y189      c1360     0.0446827524   c1541      2.196969697
    Y189      c1564     0.0126870184   c1629     0.0214945905
    Y189      c1662     0.0460186863   c1716      2.196969697
    Y189      c1722     0.0373486646   c1731     0.0135575120
    Y189      c1764     0.0187006247   c1785     0.0010951216
    Y189      c1797     0.0403553314   c1813     2.3333333333
    Y189      c1814     0.0093445099   c1861     0.0861931238
    Y189      c1866     0.0415936323   c1869     0.0357370569
    Y189      c1883     0.0527532383   c1897     0.4378902711
    Y189      c1900     0.3163614578
    Y190      obj                  2   A10                  1
    Y190      B10                  1   G190                -1
    Y190      c1360     0.0446827524   c1564     0.0274676625
    Y190      c1629     0.0214945905   c1662     0.0460186863
    Y190      c1722     0.0372459860   c1731     0.1078505741
    Y190      c1764     0.0296367358   c1785     0.0010951216
    Y190      c1797     0.0484503326   c1814     0.0093445099
    Y190      c1861     0.1034828702   c1866     0.0415936323
    Y190      c1869     0.0316972262   c1883     0.0527532383
    Y191      obj                  5   A10                  1
    Y191      B11                  1   G191                -1
    Y191      c1037     0.1003371772   c1119     0.0036360953
    Y191      c1360     0.0446827524   c1432     0.0184402710
    Y191      c1465     0.0585359758   c1564     0.0051833805
    Y191      c1629     0.0214945905   c1662     0.0460186863
    Y191      c1722     0.0370883731   c1731     4.6449210E-4
    Y191      c1764     0.0148278958   c1785     0.0111328086
    Y191      c1797     0.0316271558   c1814     0.0516972665
    Y191      c1861     0.0675510091   c1866     0.0567779006
    Y191      c1869     0.0443850507   c1883     0.0527532383
    Y191      c1886     0.0810522493   c1895     0.0277884052
    Y191      c1896     0.0159188430
    Y192      obj                  5   A10                  1
    Y192      B12                  1   G192                -1
    Y192      c1360     0.0446827524   c1564     0.0051595420
    Y192      c1629     0.0214945905   c1662     0.0460186863
    Y192      c1722     0.0370877773   c1731     4.6386807E-4
    Y192      c1764     0.0145892557   c1785     0.0010951216
    Y192      c1797     0.0316271558   c1814     0.0093445099
    Y192      c1861     0.0675510091   c1866     0.0415936323
    Y192      c1869     0.0316968634   c1883     0.0527532383
    Y193      obj                  8   A10                  1
    Y193      B13                  1   G193                -1
    Y193      c789      0.0811192936   c1360     0.0446827524
    Y193      c1564     0.0051595420   c1629     0.0214945905
    Y193      c1662     0.0292846186   c1722     0.0084891831
    Y193      c1731     3.0825865E-4   c1759     0.0506251707
    Y193      c1764     0.0134322112   c1785     0.0010951216
    Y193      c1797     0.0316271558   c1814     0.0093445099
    Y193      c1861     0.0675510091   c1866     0.0415936323
    Y193      c1869     0.0316977177   c1878     0.0417891967
    Y193      c1883     0.0527532383
    Y194      obj                  7   A10                  1
    Y194      B14                  1   G194                -1
    Y194      c22                 -1   c100                -1
    Y194      c107                -1   c1360     0.0446827524
    Y194      c1564     0.0017543021   c1629     0.0214945905
    Y194      c1662     0.0069061232   c1722     0.0084788087
    Y194      c1731     4.6999849E-4   c1733     0.0339702760
    Y194      c1764     0.0120370300   c1785     0.0010951216
    Y194      c1797     0.0316271558   c1814     0.0093445099
    Y194      c1861     0.0675510091   c1866     0.0415936323
    Y194      c1869     0.0317102234   c1883     0.0527532383
    Y194      c1903     0.0584368151   c1904                1
    Y195      obj                  4   A10                  1
    Y195      B15                  1   G195                -1
    Y195      c1360     0.0446827524   c1564     0.0043537979
    Y195      c1629     0.0214945905   c1662     0.0189254337
    Y195      c1722     0.0084767600   c1731     3.0478080E-4
    Y195      c1764     0.0122537361   c1785     0.0010951216
    Y195      c1797     0.0316271558   c1814     0.0093445099
    Y195      c1861     0.0675510091   c1866     0.0415936323
    Y195      c1869     0.0316968503   c1883     0.0527532383
    Y196      obj                  6   A10                  1
    Y196      B16                  1   G196                -1
    Y196      c1037     0.1373035056   c1119     0.1839864271
    Y196      c1360     0.0446827524   c1432     0.1818968246
    Y196      c1465     0.2218183501   c1564     0.0053182380
    Y196      c1629     0.0214945905   c1662     0.0460186863
    Y196      c1722     0.0370889497   c1731     4.7954679E-4
    Y196      c1764     0.0161391932   c1785     0.2288526070
    Y196      c1797     0.0316271558   c1814     0.1677115775
    Y196      c1861     0.0675510091   c1866     0.2452411547
    Y196      c1869     0.2303794427   c1871     0.2191235059
    Y196      c1872              2.2   c1883     0.0527532383
    Y196      c1886     0.1293628152   c1895     0.0932303684
    Y196      c1896     0.1799373928
    Y197      obj                  9   A10                  1
    Y197      B17                  1   G197                -1
    Y197      c1360     0.0446827524   c1564     0.0051595420
    Y197      c1629     0.0214945905   c1662     0.0460186863
    Y197      c1722     0.0370867320   c1731     4.6386834E-4
    Y197      c1764     0.0145892557   c1785     0.0010952229
    Y197      c1797     0.0316271558   c1814     0.0093485233
    Y197      c1861     0.0675510091   c1866     0.0415974803
    Y197      c1869     0.0317057194   c1883     0.0527532383
    Y197      c1886     3.9491562E-4   c1896     4.3063573E-5
    Y198      obj                  7   A11                  1
    Y198      B0                   1   G198                -1
    Y198      c1360     0.0446827524   c1564     0.0047195430
    Y198      c1629     0.0214945905   c1722     7.4145033E-5
    Y198      c1731     0.0425261041   c1764     0.0023825998
    Y198      c1785     0.0010951216   c1814     0.0093445099
    Y198      c1866     0.0415936323   c1869     0.0316865714
    Y198      c1883     0.0527532383
    Y199      obj                  4   A11                  1
    Y199      B1                   1   G199                -1
    Y199      c1037     6.8320424E-4   c1360     0.0446827524
    Y199      c1432     0.0010356991   c1465     8.5497462E-4
    Y199      c1564     0.0271342859   c1629     0.0214945905
    Y199      c1722     2.3549547E-4   c1731     0.1500756853
    Y199      c1764     0.0240659446   c1785     0.0014813809
    Y199      c1797     0.0860146311   c1814     0.0121447137
    Y199      c1861     0.0929482030   c1866     0.0422710060
    Y199      c1869     0.0326341474   c1883     0.0527532383
    Y199      c1886     8.7805208E-4   c1895     0.0202302227
    Y199      c1896     8.9408296E-4
    Y200      obj                  1   A11                  1
    Y200      B2                   1   G200                -1
    Y200      c77                 -1   c91                 -1
    Y200      c101                -1   c1360     0.0446827524
    Y200      c1564     0.0065186229   c1629     0.0214945905
    Y200      c1722     8.7511103E-5   c1731      -0.03914326
    Y200      c1764     0.0028996330   c1785     0.0010951216
    Y200      c1797     -3.218993E-4   c1814     0.0093445099
    Y200      c1861     0.0363868463   c1866     0.0415936323
    Y200      c1869     0.0316870269   c1883     0.0527532383
    Y201      obj                  3   A11                  1
    Y201      B3                   1   G201                -1
    Y201      c789      0.0333991310   c1360     0.0446827524
    Y201      c1564     0.0271343073   c1629     0.0214945905
    Y201      c1722     2.3906950E-4   c1731     0.1500864143
    Y201      c1759     0.0472338123   c1764     0.0240708028
    Y201      c1785     0.0010951216   c1797     0.0860146311
    Y201      c1814     0.0093445099   c1861     0.0929482030
    Y201      c1866     0.0415936323   c1869     0.0316912546
    Y201      c1878     0.0696486611   c1883     0.0527532383
    Y201      c1913     0.0724637681
    Y202      obj                 10   A11                  1
    Y202      B4                   1   G202                -1
    Y202      c1360     0.0446827524   c1398     0.1541810266
    Y202      c1564     0.1492278413   c1629     0.0214945905
    Y202      c1722     0.0997762850   c1731     0.1512131862
    Y202      c1763                1   c1764     0.1299717778
    Y202      c1785     0.0010951216   c1797     0.0860146311
    Y202      c1814     0.0093445099   c1861     0.0929482030
    Y202      c1866     0.0415936323   c1869     0.0316984094
    Y202      c1883     0.0527532383   c1907     0.0772797527
    Y203      obj                  3   A11                  1
    Y203      B5                   1   G203                -1
    Y203      c959      0.2783351185   c1230     0.1440351831
    Y203      c1360     0.0446827524   c1564     0.0289686057
    Y203      c1629     0.0214945905   c1691     0.0318581251
    Y203      c1722     8.9662927E-4   c1731     0.1509000044
    Y203      c1764     0.0251948084   c1785     0.0010951216
    Y203      c1797     0.0884592728   c1814     0.0093445099
    Y203      c1861     0.0981696024   c1866     0.0415936323
    Y203      c1869     0.0337802127   c1883     0.0527532383
    Y203      c1897     0.2583582082   c1900     0.2262352285
    Y204      obj                  1   A11                  1
    Y204      B6                   1   G204                -1
    Y204      c1179     0.0407196543   c1186     0.0541549058
    Y204      c1360     0.0446827524   c1449     0.0922010069
    Y204      c1468     0.0468199903   c1564     0.0272716422
    Y204      c1629     0.0214945905   c1722     2.5499524E-4
    Y204      c1731     0.1277555013   c1764     0.0202470635
    Y204      c1771     0.0274588125   c1785     0.0010951216
    Y204      c1797     0.0860146311   c1814     0.0093445099
    Y204      c1853     0.0343796191   c1861     0.0929482030
    Y204      c1862     0.0302756519   c1866     0.0415936323
    Y204      c1869     0.0316959553   c1883     0.0527532383
    Y204      c1908     0.0025155296
    Y205      obj                  5   A11                  1
    Y205      B7                   1   G205                -1
    Y205      c101                -1   c985                -1
    Y205      c1360     0.0446827524   c1564     0.0015587061
    Y205      c1629     0.0214945905   c1722     2.4726408E-5
    Y205      c1731      -0.00393426   c1764     0.0046358252
    Y205      c1785     0.0010951216   c1814     0.0105364778
    Y205      c1861     0.0370743765   c1866     0.0415936323
    Y205      c1869     0.0327436543   c1883     0.0527532383
    Y205      c1914               -1
    Y206      obj                  2   A11                  1
    Y206      B8                   1   G206                -1
    Y206      c81                  1   c82                  1
    Y206      c105                 1   c465      0.0958286358
    Y206      c1360     0.0446827524   c1564     0.0271015552
    Y206      c1629     0.0716486350   c1722     2.3525804E-4
    Y206      c1731     0.0979769335   c1764     0.0201181153
    Y206      c1768     0.0917431192   c1785     0.0010951216
    Y206      c1797     0.0858915570   c1814     0.0093445099
    Y206      c1861     0.0926853345   c1866     0.0415936323
    Y206      c1869     0.0316880210   c1883     0.0527532383
    Y207      obj                  5   A11                  1
    Y207      B9                   1   G207                -1
    Y207      c77                 -1   c959      0.0724123885
    Y207      c1230     0.0515201733   c1360     0.0446827524
    Y207      c1564     0.0073820484   c1629     0.0214945905
    Y207      c1722     1.4151588E-4   c1731     0.0717513285
    Y207      c1764     0.0066785388   c1785     0.0010951216
    Y207      c1797     0.0346172002   c1814     0.0093445099
    Y207      c1861     0.0070816788   c1866     0.0415936323
    Y207      c1869     0.0313839110   c1883     0.0527532383
    Y207      c1897     0.0191083179   c1900     0.0588579456
    Y208      obj                  1   A11                  1
    Y208      B10                  1   G208                -1
    Y208      c77                 -1   c1360     0.0446827524
    Y208      c1564     0.0271015552   c1629     0.0214945905
    Y208      c1722     2.3474561E-4   c1731     0.1500751945
    Y208      c1764     0.0186950084   c1785     0.0010951216
    Y208      c1797     0.0860146311   c1814     0.0093445099
    Y208      c1861     0.0929482030   c1866     0.0415936323
    Y208      c1869     0.0316876032   c1883     0.0527532383
    Y209      obj                  5   A11                  1
    Y209      B11                  1   G209                -1
    Y209      c1037     0.1003371772   c1119     0.0036360953
    Y209      c1360     0.0446827524   c1432     0.0184402710
    Y209      c1465     0.0585359758   c1564     0.0271580330
    Y209      c1629     0.0214945905   c1722     2.3713585E-4
    Y209      c1731     0.1500759280   c1764     0.0243012463
    Y209      c1785     0.0111328086   c1797     0.0860146311
    Y209      c1814     0.0516972665   c1861     0.0929482030
    Y209      c1866     0.0567779006   c1869     0.0443796979
    Y209      c1883     0.0527532383   c1886     0.0810522493
    Y209      c1895     0.0277884052   c1896     0.0159188430
    Y210      obj                  6   A11                  1
    Y210      B12                  1   G210                -1
    Y210      c1360     0.0446827524   c1564     0.0271220105
    Y210      c1629     0.0214945905   c1722     2.3645311E-4
    Y210      c1731     0.1500752631   c1764     0.0240626061
    Y210      c1785     0.0010951216   c1797     0.0860146311
    Y210      c1814     0.0093445099   c1861     0.0929482030
    Y210      c1866     0.0415936323   c1869     0.0316892737
    Y210      c1883     0.0527532383
    Y211      obj                  6   A11                  1
    Y211      B13                  1   G211                -1
    Y211      c91                 -1   c789      0.0925151533
    Y211      c1360     0.0446827524   c1564      -0.00461785
    Y211      c1629     0.0214945905   c1722     1.5814360E-5
    Y211      c1731      -0.05732679   c1759     0.0506251707
    Y211      c1764     0.0018584728   c1785     0.0010951216
    Y211      c1814     0.0093445099   c1861     0.0370743765
    Y211      c1866     0.0415936323   c1869     0.0316896564
    Y211      c1878     0.0696486611   c1883     0.0527532383
    Y211      c1913     0.0724637681
    Y212      obj                  3   A11                  1
    Y212      B14                  1   G212                -1
    Y212      c1360     0.0446827524   c1564     0.0171543469
    Y212      c1629     0.0214945905   c1662     0.0069061232
    Y212      c1722     1.9389670E-4   c1731     0.0571657416
    Y212      c1764     0.0137292784   c1785     0.0010951216
    Y212      c1797     0.0703756073   c1814     0.0093445099
    Y212      c1861     0.0598976994   c1866     0.0415936323
    Y212      c1869     0.0317085917   c1883     0.0527532383
    Y212      c1904                1
    Y213      obj                  9   A11                  1
    Y213      B15                  1   G213                -1
    Y213      c1360     0.0446827524   c1564     0.0305974502
    Y213      c1629     0.0214945905   c1722     2.6218103E-4
    Y213      c1731     0.1500904266   c1764     0.0254391311
    Y213      c1785     0.0010951216   c1797     0.0860146311
    Y213      c1814     0.0093445099   c1861     0.0929482030
    Y213      c1866     0.0415936323   c1869     0.0316917187
    Y213      c1883     0.0527532383
    Y214      obj                  9   A11                  1
    Y214      B16                  1   G214                -1
    Y214      c1037     0.1373035056   c1119     0.1839864271
    Y214      c1360     0.0446827524   c1432     0.1818968246
    Y214      c1465     0.2218183501   c1564     0.0273372014
    Y214      c1629     0.0214945905   c1722     2.3855081E-4
    Y214      c1731     0.1500911314   c1764     0.0256125436
    Y214      c1785     0.2288526070   c1797     0.0860146311
    Y214      c1814     0.1677115775   c1861     0.0929482030
    Y214      c1866     0.2452411547   c1869     0.2303706046
    Y214      c1871     0.2191235059   c1872              2.2
    Y214      c1883     0.0527532383   c1886     0.1293628152
    Y214      c1895     0.0932303684   c1896     0.1799373928
    Y215      obj                  3   A11                  1
    Y215      B17                  1   G215                -1
    Y215      c1360     0.0446827524   c1564     0.0271015552
    Y215      c1629     0.0214945905   c1722     2.3526181E-4
    Y215      c1731     0.1500751948   c1764     0.0240626061
    Y215      c1785     0.0010952229   c1797     0.0860146311
    Y215      c1814     0.0093485233   c1861     0.0929482030
    Y215      c1866     0.0415974803   c1869     0.0317003665
    Y215      c1883     0.0527532383   c1886     3.9491562E-4
    Y215      c1896     4.3063573E-5
    Y216      obj                  4   A12                  1
    Y216      B0                   1   G216                -1
    Y216      c1360     0.0446827524   c1564     0.0025541271
    Y216      c1629     0.0214945905   c1722     7.6918671E-5
    Y216      c1731     7.0374694E-4   c1764     0.0164054795
    Y216      c1785     0.0010951216   c1797     0.0316271558
    Y216      c1814     0.0093445099   c1861     0.0675510091
    Y216      c1866     0.0415936323   c1869     0.0323997991
    Y216      c1883     0.0527532383
    Y217      obj                  7   A12                  1
    Y217      B1                   1   G217                -1
    Y217      c1037     6.8320424E-4   c1360     0.0446827524
    Y217      c1432     0.0010356991   c1465     8.5497462E-4
    Y217      c1564     2.5582539E-4   c1629     0.0214945905
    Y217      c1722     2.3563062E-5   c1731     7.0424907E-6
    Y217      c1764     0.0101632430   c1785     0.0014813809
    Y217      c1797     0.0316271558   c1814     0.0121447137
    Y217      c1861     0.0675510091   c1866     0.0422710060
    Y217      c1869     0.0333444550   c1883     0.0527532383
    Y217      c1886     8.7805208E-4   c1895     0.0202302227
    Y217      c1896     8.9408296E-4
    Y218      obj                  1   A12                  1
    Y218      B2                   1   G218                -1
    Y218      c985                 1   c1360     0.0446827524
    Y218      c1564     0.0153911898   c1629     0.0214945905
    Y218      c1722     1.4121353E-4   c1731     0.0248550837
    Y218      c1764     0.0182543437   c1785     0.0010951216
    Y218      c1797     0.0498770013   c1814     0.0093445099
    Y218      c1861     0.1065300272   c1866     0.0415936323
    Y218      c1869     0.0324040840   c1883     0.0527532383
    Y219      obj                 10   A12                  1
    Y219      B3                   1   G219                -1
    Y219      c789      0.0333991310   c1360     0.0446827524
    Y219      c1564     2.5584682E-4   c1629     0.0214945905
    Y219      c1722     2.9642076E-5   c1731     1.4869813E-5
    Y219      c1759     0.0472338123   c1764     0.0101710744
    Y219      c1785     0.0010951216   c1797     0.0316271558
    Y219      c1814     0.0093445099   c1861     0.0675510091
    Y219      c1866     0.0415936323   c1869     0.0324015633
    Y219      c1878     0.0696486611   c1883     0.0527532383
    Y219      c1913     0.0724637681
    Y220      obj                  3   A12                  1
    Y220      B4                   1   G220                -1
    Y220      c1360     0.0446827524   c1398     0.1541810266
    Y220      c1564     0.1223493808   c1629     0.0214945905
    Y220      c1722     0.0995693060   c1731     0.0013814080
    Y220      c1763                1   c1764     0.1160002027
    Y220      c1785     0.0010951216   c1797     0.0316271558
    Y220      c1814     0.0093445099   c1861     0.0675510091
    Y220      c1866     0.0415936323   c1869     0.0324034019
    Y220      c1883     0.0527532383   c1907     0.0772797527
    Y221      obj                  8   A12                  1
    Y221      B5                   1   G221                -1
    Y221      c959      0.2783351185   c1230     0.1440351831
    Y221      c1360     0.0446827524   c1564     0.0020901452
    Y221      c1629     0.0214945905   c1691     0.0318581251
    Y221      c1722     6.8965027E-4   c1731     0.0027837027
    Y221      c1764     0.0112232332   c1785     0.0010951216
    Y221      c1797     0.0340717975   c1814     0.0093445099
    Y221      c1861     0.0727724086   c1866     0.0415936323
    Y221      c1869     0.0330959367   c1883     0.0527532383
    Y221      c1897     0.2583582082   c1900     0.2262352285
    Y222      obj                  2   A12                  1
    Y222      B6                   1   G222                -1
    Y222      c64                 -1   c90                 -1
    Y222      c1179      -0.00768219   c1360     0.0446827524
    Y222      c1468     0.0171673297   c1564     1.2922753E-4
    Y222      c1629     0.0214945905   c1722     -5.473231E-7
    Y222      c1731     4.0698157E-6   c1764     0.0100911409
    Y222      c1771      -0.06208975   c1785     0.0010951216
    Y222      c1797     0.0316271558   c1814     0.0093445099
    Y222      c1853     -8.923392E-4   c1861     0.0675510091
    Y222      c1862      -0.02806809   c1866     0.0415936323
    Y222      c1869     0.0323950472   c1883     0.0527532383
    Y223      obj                  9   A12                  1
    Y223      B7                   1   G223                -1
    Y223      c1360     0.0446827524   c1564     3.0945131E-4
    Y223      c1629     0.0214945905   c1722     2.3532074E-5
    Y223      c1731     6.1382604E-5   c1764     0.0101550995
    Y223      c1785     0.0010951216   c1797     0.0316271558
    Y223      c1814     0.0105364778   c1861     0.0675510091
    Y223      c1866     0.0415936323   c1869     0.0334600822
    Y223      c1883     0.0527532383
    Y224      obj                  9   A12                  1
    Y224      B8                   1   G224                -1
    Y224      c465      0.1352874859   c1360     0.0759606791
    Y224      c1564     0.0570307143   c1629     0.1067564662
    Y224      c1691     0.0424775001   c1722     0.0016968101
    Y224      c1731     0.0983614830   c1764     0.0514031005
    Y224      c1768     0.0917431192   c1785     0.0010951216
    Y224      c1797     0.4016770605   c1814     0.0093445099
    Y224      c1861     0.2751734007   c1866     0.0415936323
    Y224      c1869     0.0333312575   c1883     0.0896805052
    Y224      c1902     1.4285714286
    Y225      obj                  6   A12                  1
    Y225      B9                   1   G225                -1
    Y225      c959      0.3892165884   c1230     0.2881623277
    Y225      c1360     0.0446827524   c1541      2.196969697
    Y225      c1564     0.0076319564   c1629     0.0214945905
    Y225      c1722     2.6364892E-4   c1731     0.0126697304
    Y225      c1764     0.0136075848   c1785     0.0010951216
    Y225      c1797     0.0403553314   c1813     2.3333333333
    Y225      c1814     0.0093445099   c1861     0.0861931238
    Y225      c1866     0.0415936323   c1869     0.0338824669
    Y225      c1883     0.0527532383   c1897     0.4001619347
    Y225      c1900     0.3163614578
    Y226      obj                  6   A12                  1
    Y226      B10                  1   G226                -1
    Y226      c1360     0.0446827524   c1564     0.0224373866
    Y226      c1629     0.0214945905   c1722     1.6114723E-4
    Y226      c1731     0.1075561313   c1764     0.0260576282
    Y226      c1785     0.0010951216   c1797     0.0484503326
    Y226      c1814     0.0093445099   c1861     0.1034828702
    Y226      c1866     0.0415936323   c1869     0.0324001224
    Y226      c1883     0.0527532383
    Y227      obj                  9   A12                  1
    Y227      B11                  1   G227                -1
    Y227      c1037     0.1003371772   c1119     0.0036360953
    Y227      c1360     0.0446827524   c1432     0.0184402710
    Y227      c1465     0.0585359758   c1564     2.7957255E-4
    Y227      c1629     0.0214945905   c1722     2.5653691E-5
    Y227      c1731     7.2644521E-6   c1764     0.0103356807
    Y227      c1785     0.0111328086   c1797     0.0316271558
    Y227      c1814     0.0516972665   c1861     0.0675510091
    Y227      c1866     0.0567779006   c1869     0.0440529537
    Y227      c1883     0.0527532383   c1886     0.0810522493
    Y227      c1895     0.0277884052   c1896     0.0159188430
    Y228      obj                  7   A12                  1
    Y228      B12                  1   G228                -1
    Y228      c1360     0.0446827524   c1564     2.4355007E-4
    Y228      c1629     0.0214945905   c1722     2.3532074E-5
    Y228      c1731     8.0218945E-6   c1764     0.0100910310
    Y228      c1785     0.0010951216   c1797     0.0316271558
    Y228      c1814     0.0093445099   c1861     0.0675510091
    Y228      c1866     0.0415936323   c1869     0.0323997615
    Y228      c1883     0.0527532383
    Y229      obj                  7   A12                  1
    Y229      B13                  1   G229                -1
    Y229      c789      0.0925151533   c1360     0.0446827524
    Y229      c1564     2.5583504E-4   c1629     0.0214945905
    Y229      c1722     3.7574526E-5   c1731     1.5049139E-5
    Y229      c1759     0.0843752845   c1764     0.0101614639
    Y229      c1785     0.0010951216   c1797     0.0316271558
    Y229      c1814     0.0093445099   c1861     0.0675510091
    Y229      c1866     0.0415936323   c1869     0.0324033541
    Y229      c1878     0.0696486611   c1883     0.0527532383
    Y229      c1913     0.0724637681
    Y230      obj                  9   A12                  1
    Y230      B14                  1   G230                -1
    Y230      c1360     0.0446827524   c1564     0.0036820992
    Y230      c1629     0.0214945905   c1662     0.0069061232
    Y230      c1722     0.0144455688   c1731     0.0023873300
    Y230      c1733     0.1401273885   c1764     0.0170455171
    Y230      c1785     0.0010951216   c1797     0.0333706767
    Y230      c1814     0.0093445099   c1861     0.0712749163
    Y230      c1866     0.0415936323   c1869     0.0324245501
    Y230      c1883     0.0527532383   c1903     0.2410518626
    Y230      c1904                1
    Y231      obj                  1   A12                  1
    Y231      B15                  1   G231                -1
    Y231      c45                 -1   c61                 -1
    Y231      c85                 -1   c1360     0.0446827524
    Y231      c1564     -7.057656E-4   c1629     0.0214945905
    Y231      c1722     -2.149120E-6   c1731     4.0397006E-6
    Y231      c1764     0.0098866369   c1785     0.0010951216
    Y231      c1797     0.0316271558   c1814     0.0093445099
    Y231      c1861     0.0675510091   c1866     0.0415936323
    Y231      c1869     0.0299093748   c1883     0.0527532383
    Y231      c1908      -0.00107737
    Y232      obj                  3   A12                  1
    Y232      B16                  1   G232                -1
    Y232      c1037     0.1373035056   c1119     0.1839864271
    Y232      c1360     0.0446827524   c1432     0.1818968246
    Y232      c1465     0.2218183501   c1564     4.5874096E-4
    Y232      c1629     0.0214945905   c1722     3.1571807E-5
    Y232      c1731     1.9586904E-5   c1764     0.0116409684
    Y232      c1785     0.2288526070   c1797     0.0316271558
    Y232      c1814     0.1677115775   c1861     0.0675510091
    Y232      c1866     0.2452411547   c1869     0.2310823417
    Y232      c1871     0.2191235059   c1872              2.2
    Y232      c1883     0.0527532383   c1886     0.1293628152
    Y232      c1895     0.0932303684   c1896     0.1799373928
    Y233      obj                 10   A12                  1
    Y233      B17                  1   G233                -1
    Y233      c1360     0.0446827524   c1564     2.2309471E-4
    Y233      c1629     0.0214945905   c1722     2.3532074E-5
    Y233      c1731     7.0409267E-6   c1764     0.0100910310
    Y233      c1785     0.0010952229   c1797     0.0316271558
    Y233      c1814     0.0093485233   c1861     0.0675510091
    Y233      c1866     0.0415974803   c1869     0.0324026927
    Y233      c1883     0.0527532383   c1886     3.9491562E-4
    Y233      c1896     4.3063573E-5
    Y234      obj                  6   A13                  1
    Y234      B0                   1   G234                -1
    Y234      c574      0.0847457627   c1037     7.5152467E-4
    Y234      c1360     0.0446827524   c1432     1.2710145E-4
    Y234      c1564     0.0025351852   c1629     0.0214945905
    Y234      c1722     7.4338456E-5   c1731     7.0714291E-4
    Y234      c1764     0.0164056355   c1785     0.0011428641
    Y234      c1797     0.0316271558   c1814     0.0094297176
    Y234      c1861     0.0675510091   c1866     0.0418938328
    Y234      c1869     0.0355644857   c1883     0.0527532383
    Y234      c1886     9.8575547E-4   c1890     0.1916343251
    Y234      c1892     0.2042876009   c1895     0.0887777893
    Y234      c1896     9.4739861E-5
    Y235      obj                  4   A13                  1
    Y235      B1                   1   G235                -1
    Y235      c574      0.0847457627   c1037     3.4160212E-4
    Y235      c1360     0.0446827524   c1564     1.0900673E-4
    Y235      c1629     0.0214945905   c1722     1.9472441E-5
    Y235      c1731     7.0409267E-6   c1764     0.0100711828
    Y235      c1785     0.0010703344   c1797     0.0316271558
    Y235      c1814     6.6190268E-5   c1861     0.0675510091
    Y235      c1866     0.0413281585   c1869     0.0308198857
    Y235      c1883     0.0527532383   c1886     3.4378225E-4
    Y235      c1895     0.0016772834   c1896     4.3063573E-5
    Y236      obj                  8   A13                  1
    Y236      B2                   1   G236                -1
    Y236      c574      0.0847457627   c985                 1
    Y236      c1037     7.5152467E-4   c1360     0.0446827524
    Y236      c1432     1.2710145E-4   c1564     0.0153722479
    Y236      c1629     0.0214945905   c1722     1.5644638E-4
    Y236      c1731     0.0248550837   c1764     0.0182234421
    Y236      c1785     0.0011428641   c1797     0.0498770013
    Y236      c1814     0.0094297176   c1861     0.1065300272
    Y236      c1866     0.0418938328   c1869     0.0355687706
    Y236      c1883     0.0527532383   c1886     9.8575547E-4
    Y236      c1890     0.1916343251   c1892     0.2042876009
    Y236      c1895     0.0887777893   c1896     9.4739861E-5
    Y236      c1914                1
    Y237      obj                  1   A13                  1
    Y237      B3                   1   G237                -1
    Y237      c72                 -1   c1119      -0.00176295
    Y237      c1360     0.0446827524   c1432     -6.934911E-4
    Y237      c1465      -0.00212546   c1564     1.0917190E-4
    Y237      c1629     0.0214945905   c1722     1.8587291E-5
    Y237      c1731     6.6135647E-6   c1759     0.0472338123
    Y237      c1764     0.0100760995   c1785     -6.958088E-4
    Y237      c1797     0.0316271558   c1814     0.0080176239
    Y237      c1861     0.0675510091   c1866     0.0396467054
    Y237      c1869     0.0298794382   c1883     0.0527532383
    Y237      c1886     -3.469894E-7   c1895     -8.933320E-4
    Y237      c1896      -0.00155830
    Y238      obj                  2   A13                  1
    Y238      B4                   1   G238                -1
    Y238      c574      0.0847457627   c1037     3.4160212E-4
    Y238      c1360     0.0446827524   c1398     0.0362778886
    Y238      c1432     1.2710145E-4   c1564     0.0649308953
    Y238      c1629     0.0214945905   c1722     0.0235160672
    Y238      c1731     0.0013814080   c1763                1
    Y238      c1764     0.0794805132   c1785     0.0011426525
    Y238      c1797     0.0316271558   c1814     0.0093567200
    Y238      c1861     0.0675510091   c1866     0.0418932811
    Y238      c1869     0.0355300616   c1883     0.0527532383
    Y238      c1886     6.6347919E-4   c1890     0.1916343251
    Y238      c1892     0.2042876009   c1895     0.0886796220
    Y238      c1896     4.3063573E-5   c1907     0.0154559505
    Y239      obj                  3   A13                  1
    Y239      B5                   1   G239                -1
    Y239      c574      0.0847457627   c959      0.2783351185
    Y239      c1037     7.5152467E-4   c1230     0.1440351831
    Y239      c1360     0.0446827524   c1432     1.2710145E-4
    Y239      c1564     0.0019446683   c1629     0.0214945905
    Y239      c1691     0.0318581251   c1722     6.8219236E-4
    Y239      c1731     0.0027836988   c1764     0.0112233892
    Y239      c1785     0.0011428641   c1797     0.0340717975
    Y239      c1814     0.0094297176   c1861     0.0727724086
    Y239      c1866     0.0418279723   c1869     0.0362606212
    Y239      c1883     0.0527532383   c1886     9.2302255E-4
    Y239      c1890     0.1043553255   c1892     0.2005732809
    Y239      c1895     0.0887777893   c1896     9.4739861E-5
    Y239      c1897     0.2583582082   c1900     0.2262352285
    Y240      obj                  4   A13                  1
    Y240      B6                   1   G240                -1
    Y240      c574      0.0847457627   c1037     7.5152467E-4
    Y240      c1179     0.0407196543   c1186     0.0541549058
    Y240      c1360     0.0446827524   c1432     1.2710145E-4
    Y240      c1449     0.0922010069   c1468     0.0468199903
    Y240      c1564     2.4770480E-4   c1629     0.0214945905
    Y240      c1722     3.8981788E-5   c1731     8.2446532E-6
    Y240      c1764     0.0101391206   c1771     0.0315099304
    Y240      c1785     0.0011428641   c1797     0.0316271558
    Y240      c1814     0.0094297176   c1853     0.0714379900
    Y240      c1861     0.0675510091   c1862     0.0302756519
    Y240      c1866     0.0418938328   c1869     0.0355644485
    Y240      c1883     0.0527532383   c1886     9.8575547E-4
    Y240      c1890     0.1916343251   c1892     0.2042876009
    Y240      c1895     0.0887777893   c1896     9.4739861E-5
    Y240      c1908     0.0025155296
    Y241      obj                  9   A13                  1
    Y241      B7                   1   G241                -1
    Y241      c1037     3.6744592E-6   c1360     0.0446827524
    Y241      c1564     1.7541833E-4   c1629     0.0214945905
    Y241      c1722     1.9125880E-5   c1731     6.4391753E-5
    Y241      c1764     0.0100712152   c1785     0.0010951756
    Y241      c1797     0.0316271558   c1814     7.1197872E-7
    Y241      c1861     0.0675510091   c1866     0.0415956846
    Y241      c1869     0.0315227976   c1883     0.0527532383
    Y241      c1886     7.4802827E-5   c1896     1.2527585E-5
    Y242      obj                  9   A13                  1
    Y242      B8                   1   G242                -1
    Y242      c465      0.1352874859   c574      0.0847457627
    Y242      c1037     7.5152467E-4   c1360     0.0759606791
    Y242      c1432     1.2710145E-4   c1564     0.0568852636
    Y242      c1629     0.1067564662   c1691     0.0424775001
    Y242      c1722     0.0017134956   c1731     0.0983614830
    Y242      c1764     0.0514033366   c1768     0.0917431192
    Y242      c1785     0.0011428641   c1797     0.4016770605
    Y242      c1814     0.0094297176   c1861     0.2751734007
    Y242      c1866     0.0418938328   c1869     0.0364959420
    Y242      c1883     0.0896805052   c1886     9.8575547E-4
    Y242      c1890     0.1916343251   c1892     0.2042876009
    Y242      c1895     0.0887777893   c1896     9.4739861E-5
    Y242      c1902     1.4285714286
    Y243      obj                  2   A13                  1
    Y243      B9                   1   G243                -1
    Y243      c574      0.0847457627   c959      0.3892165884
    Y243      c1037     7.5152467E-4   c1230     0.3898861125
    Y243      c1360     0.0446827524   c1432     1.2710145E-4
    Y243      c1541      2.196969697   c1564     0.0076360262
    Y243      c1629     0.0214945905   c1716      2.196969697
    Y243      c1722     2.6712597E-4   c1731     0.0131012417
    Y243      c1764     0.0142024271   c1785     0.0011428641
    Y243      c1797     0.0403553314   c1814     0.0094297176
    Y243      c1861     0.0861931238   c1866     0.0418316112
    Y243      c1869     0.0353178910   c1883     0.0527532383
    Y243      c1886     5.8155949E-4   c1890     0.1916343251
    Y243      c1892     0.2026367920   c1895     0.0405450347
    Y243      c1896     4.3063573E-5   c1897     0.4378902711
    Y243      c1900     0.1416970007
    Y244      obj                  6   A13                  1
    Y244      B10                  1   G244                -1
    Y244      c574      0.0847457627   c1037     7.5152467E-4
    Y244      c1360     0.0446827524   c1432     1.2710145E-4
    Y244      c1564     0.0224184448   c1629     0.0214945905
    Y244      c1722     1.7873583E-4   c1731     0.1075561313
    Y244      c1764     0.0260267266   c1785     0.0011428641
    Y244      c1797     0.0484503326   c1814     0.0094297176
    Y244      c1861     0.1034828702   c1866     0.0418938328
    Y244      c1869     0.0355648090   c1883     0.0527532383
    Y244      c1886     9.8575547E-4   c1890     0.1916343251
    Y244      c1892     0.2042876009   c1895     0.0887777893
    Y244      c1896     9.4739861E-5
    Y245      obj                  2   A13                  1
    Y245      B11                  1   G245                -1
    Y245      c72                 -1   c574      0.0847457627
    Y245      c1037     2.0875685E-4   c1360     0.0446827524
    Y245      c1432     5.7773387E-5   c1564     1.1020637E-4
    Y245      c1629     0.0214945905   c1722     2.0951858E-5
    Y245      c1731     7.0409267E-6   c1764     0.0100910582
    Y245      c1785     0.0011167220   c1797     0.0316271558
    Y245      c1814     0.0141905625   c1861     0.0675510091
    Y245      c1866     0.0417919768   c1869     0.0334399034
    Y245      c1883     0.0527532383   c1886     3.3470540E-4
    Y245      c1890     0.0871065114   c1892     0.0928580004
    Y245      c1895     0.0405450347   c1896     4.3063573E-5
    Y246      obj                  5   A13                  1
    Y246      B12                  1   G246                -1
    Y246      c574      0.0847457627   c1037     3.4160212E-4
    Y246      c1360     0.0446827524   c1432     5.7773387E-5
    Y246      c1564     1.1023523E-4   c1629     0.0214945905
    Y246      c1722     2.0951858E-5   c1731     8.0218945E-6
    Y246      c1764     0.0100910582   c1785     0.0011167969
    Y246      c1797     0.0316271558   c1814     0.0093502893
    Y246      c1861     0.0675510091   c1866     0.0417921467
    Y246      c1869     0.0334488863   c1883     0.0527532383
    Y246      c1886     6.6347919E-4   c1890     0.1043553255
    Y246      c1892     0.0928580004   c1895     0.0412238009
    Y246      c1896     4.3063573E-5
    Y247      obj                  7   A13                  1
    Y247      B13                  1   G247                -1
    Y247      c574      0.0847457627   c789      0.0925151533
    Y247      c1037     7.5152467E-4   c1360     0.0446827524
    Y247      c1432     1.2710145E-4   c1564     1.2211761E-4
    Y247      c1629     0.0214945905   c1722     3.5106474E-5
    Y247      c1731     1.8060106E-5   c1759     0.0843752845
    Y247      c1764     0.0101136119   c1785     0.0011428641
    Y247      c1797     0.0316271558   c1814     0.0094297176
    Y247      c1861     0.0675510091   c1866     0.0418938328
    Y247      c1869     0.0355680388   c1878     0.0696486611
    Y247      c1883     0.0527532383   c1886     9.8575547E-4
    Y247      c1890     0.1916343251   c1892     0.2042876009
    Y247      c1895     0.0887777893   c1896     9.4739861E-5
    Y247      c1913     0.0724637681
    Y248      obj                  8   A13                  1
    Y248      B14                  1   G248                -1
    Y248      c574      0.0847457627   c1037     7.5152467E-4
    Y248      c1360     0.0446827524   c1432     1.2710145E-4
    Y248      c1564     0.0035366223   c1629     0.0214945905
    Y248      c1662     0.0069061232   c1722     0.0144622541
    Y248      c1731     0.0023903015   c1733     0.1401273885
    Y248      c1764     0.0169564861   c1785     0.0011428641
    Y248      c1797     0.0333706767   c1814     0.0094297176
    Y248      c1861     0.0712749163   c1866     0.0418938328
    Y248      c1869     0.0355892346   c1883     0.0527532383
    Y248      c1886     9.8575547E-4   c1890     0.1916343251
    Y248      c1892     0.2042876009   c1895     0.0887777893
    Y248      c1896     9.4739861E-5   c1903     0.2410518626
    Y248      c1904                1
    Y249      obj                 10   A13                  1
    Y249      B15                  1   G249                -1
    Y249      c574      0.0847457627   c1037     7.5152467E-4
    Y249      c1360     0.0446827524   c1432     1.2710145E-4
    Y249      c1564     0.0035735127   c1629     0.0214945905
    Y249      c1722     4.6167579E-5   c1731     2.1853620E-5
    Y249      c1764     0.0118303131   c1785     0.0011428641
    Y249      c1797     0.0316271558   c1814     0.0094297176
    Y249      c1861     0.0675510091   c1866     0.0418938328
    Y249      c1869     0.0355645026   c1883     0.0527532383
    Y249      c1886     9.8575547E-4   c1890     0.1916343251
    Y249      c1892     0.2042876009   c1895     0.0887777893
    Y249      c1896     9.4739861E-5
    Y250      obj                 10   A13                  1
    Y250      B16                  1   G250                -1
    Y250      c574      0.0847457627   c1037     0.1380550303
    Y250      c1119     0.1839864271   c1360     0.0446827524
    Y250      c1432     0.1820239261   c1465     0.2218183501
    Y250      c1564     3.1326405E-4   c1629     0.0214945905
    Y250      c1722     2.8991591E-5   c1731     2.2557665E-5
    Y250      c1764     0.0116410528   c1785     0.2289000629
    Y250      c1797     0.0316271558   c1814     0.1677280074
    Y250      c1861     0.0675510091   c1866     0.2452432069
    Y250      c1869     0.2330809797   c1871     0.2191235059
    Y250      c1872              2.2   c1883     0.0527532383
    Y250      c1886     0.1303347449   c1890     0.1916343251
    Y250      c1892     0.2042876009   c1895     0.1562989351
    Y250      c1896     0.1800321327
    Y251      obj                  2   A13                  1
    Y251      B17                  1   G251                -1
    Y251      c1360     0.0446827524   c1564     7.7544389E-5
    Y251      c1629     0.0214945905   c1722     1.8361508E-5
    Y251      c1731     6.6202308E-6   c1764     0.0097330029
    Y251      c1785     0.0010950456   c1797     0.0316271558
    Y251      c1861     0.0675510091   c1866     0.0415907463
    Y251      c1869     0.0315097388   c1883     0.0527532383
    Y251      c1886     1.2593620E-4   c1896     1.2527585E-5
RHS
    rhs       A0                  21   A1                  19
    rhs       A2                  24   A3                  10
    rhs       A4                  27   A5                  25
    rhs       A6                  10   A7                  16
    rhs       A8                  17   A9                  38
    rhs       A10                 22   A11                 33
    rhs       A12                 22   A13                 26
    rhs       B0                   6   B1                  13
    rhs       B2                  21   B3                  11
    rhs       B4                  20   B5                   4
    rhs       B6                  35   B7                  13
    rhs       B8                  20   B9                   9
    rhs       B10                  7   B11                 18
    rhs       B12                 14   B13                 22
    rhs       B14                 33   B15                 45
    rhs       B16                 11   B17                  8
    rhs       c1                   1   c3                   1
    rhs       c4                   1   c7                   1
    rhs       c8                   1   c11                  1
    rhs       c12                  1   c14                  1
    rhs       c15                  1   c16                 -5
    rhs       c17                 -4   c18                  1
    rhs       c19                  1   c20                  1
    rhs       c21                  1   c22                 -6
    rhs       c24                  1   c25                 -3
    rhs       c26                 -5   c27                  1
    rhs       c29                  1   c30                  1
    rhs       c32                  1   c33                  1
    rhs       c34                  1   c35                  1
    rhs       c36                  1   c37                 -7
    rhs       c39                  1   c40                  1
    rhs       c42                  1   c43                  1
    rhs       c45                -15   c46                 -4
    rhs       c47                 -6   c48                  2
    rhs       c49                  1   c50                  1
    rhs       c51                  1   c52                  1
    rhs       c54                  1   c55                  2
    rhs       c56                  1   c58                  1
    rhs       c59                  1   c60                  1
    rhs       c61                 -2   c62                  1
    rhs       c63                  1   c64                 -8
    rhs       c65                  1   c66                  1
    rhs       c68                -13   c69                  1
    rhs       c70                 -6   c71                  2
    rhs       c72                 -3   c73                  1
    rhs       c76                  1   c77                 -8
    rhs       c78                -13   c79                 -4
    rhs       c80                  3   c81                  3
    rhs       c82                  1   c83                  2
    rhs       c84                 -6   c85                 -2
    rhs       c86                  1   c87                  3
    rhs       c88                  1   c89                  1
    rhs       c90                -16   c91                -10
    rhs       c92                  1   c93                  9
    rhs       c94                  2   c95                  1
    rhs       c96                  1   c97                  2
    rhs       c98                -17   c99                -12
    rhs       c100               -25   c101                -1
    rhs       c102                 9   c103                 1
    rhs       c104               -13   c105                10
    rhs       c106                 1   c107               -25
    rhs       c108                 1   c109                -8
    rhs       c110                 9   c111                 4
    rhs       c112               -14   c113               -16
    rhs       c123                 4   c127                 3
    rhs       c147                 7   c465      2.7057497182
    rhs       c574      4.0677966102   c789      5.4458492224
    rhs       c797      4.4749459434   c959      5.6421534927
    rhs       c1037     6.2870015664   c1119     5.3775603514
    rhs       c1179     3.3608435139   c1186      4.069146006
    rhs       c1188     3.3543505675   c1230     4.7105138088
    rhs       c1360     15.402889485   c1398     1.8138944313
    rhs       c1432     5.7005129276   c1449     3.9310803819
    rhs       c1465     7.3222137211   c1468     1.8912965489
    rhs       c1541     24.227272727   c1564     6.0290700387
    rhs       c1577     3.7976931729   c1629       9.53858279
    rhs       c1630               27   c1662      1.468215232
    rhs       c1691     1.8074176335   c1712      1.458789205
    rhs       c1716     24.227272727   c1722     2.6509231233
    rhs       c1731     4.3787065538   c1733     1.1210191083
    rhs       c1759     6.1385845544   c1763             28.5
    rhs       c1764     7.2348017755   c1768     3.3944954128
    rhs       c1771     2.5495983485   c1785     7.1876370889
    rhs       c1797     13.246016747   c1813               25
    rhs       c1814     8.7305856415   c1853     3.1556801418
    rhs       c1861     23.580782603   c1862     2.1605732431
    rhs       c1866     19.118571312   c1869     16.380071098
    rhs       c1871     3.2071713147   c1872             19.8
    rhs       c1878     4.5968116391   c1879     1.6504245409
    rhs       c1880                4   c1883     18.184920484
    rhs       c1886     5.6265869553   c1890     4.6520051746
    rhs       c1892       4.42004082   c1895     5.9123622806
    rhs       c1896      6.661139143   c1897     5.7138846879
    rhs       c1900     4.5860324489   c1902               20
    rhs       c1903     1.9284149014   c1904                8
    rhs       c1907     1.8547140649   c1908     1.7951496919
    rhs       c1913     4.7826086957
BOUNDS
 UP bnd       X0                   1
 UP bnd       X1                   1
 UP bnd       X2                   1
 UP bnd       X3                   1
 UP bnd       X4                   1
 UP bnd       X5                   1
 UP bnd       X6                   1
 UP bnd       X7                   1
 UP bnd       X8                   1
 UP bnd       X9                   1
 UP bnd       X10                  1
 UP bnd       X11                  1
 UP bnd       X12                  1
 UP bnd       X13                  1
 UP bnd       X14                  1
 UP bnd       X15                  1
 UP bnd       X16                  1
 UP bnd       X17                  1
 UP bnd       X18                  1
 UP bnd       X19                  1
 UP bnd       X20                  1
 UP bnd       X21                  1
 UP bnd       X22                  1
 UP bnd       X23                  1
 UP bnd       X24                  1
 UP bnd       X25                  1
 UP bnd       X26                  1
 UP bnd       X27                  1
 UP bnd       X28                  1
 UP bnd       X29                  1
 UP bnd       X30                  1
 UP bnd       X31                  1
 UP bnd       X32                  1
 UP bnd       X33                  1
 UP bnd       X34                  1
 UP bnd       X35                  1
 UP bnd       X36                  1
 UP bnd       X37                  1
 UP bnd       X38                  1
 UP bnd       X39                  1
 UP bnd       X40                  1
 UP bnd       X41                  1
 UP bnd       X42                  1
 UP bnd       X43                  1
 UP bnd       X44                  1
 UP bnd       X45                  1
 UP bnd       X46                  1
 UP bnd       X47                  1
 UP bnd       X48                  1
 UP bnd       X49                  1
 UP bnd       X50                  1
 UP bnd       X51                  1
 UP bnd       X52                  1
 UP bnd       X53                  1
 UP bnd       X54                  1
 UP bnd       X55                  1
 UP bnd       X56                  1
 UP bnd       X57                  1
 UP bnd       X58                  1
 UP bnd       X59                  1
 UP bnd       X60                  1
 UP bnd       X61                  1
 UP bnd       X62                  1
 UP bnd       X63                  1
 UP bnd       X64                  1
 UP bnd       X65                  1
 UP bnd       X66                  1
 UP bnd       X67                  1
 UP bnd       X68                  1
 UP bnd       X69                  1
 UP bnd       X70                  1
 UP bnd       X71                  1
 UP bnd       X72                  1
 UP bnd       X73                  1
 UP bnd       X74                  1
 UP bnd       X75                  1
 UP bnd       X76                  1
 UP bnd       X77                  1
 UP bnd       X78                  1
 UP bnd       X79                  1
 UP bnd       X80                  1
 UP bnd       X81                  1
 UP bnd       X82                  1
 UP bnd       X83                  1
 UP bnd       X84                  1
 UP bnd       X85                  1
 UP bnd       X86                  1
 UP bnd       X87                  1
 UP bnd       X88                  1
 UP bnd       X89                  1
 UP bnd       X90                  1
 UP bnd       X91                  1
 UP bnd       X92                  1
 UP bnd       X93                  1
 UP bnd       X94                  1
 UP bnd       X95                  1
 UP bnd       X96                  1
 UP bnd       X97                  1
 UP bnd       X98                  1
 UP bnd       X99                  1
 UP bnd       X100                 1
 UP bnd       X101                 1
 UP bnd       X102                 1
 UP bnd       X103                 1
 UP bnd       X104                 1
 UP bnd       X105                 1
 UP bnd       X106                 1
 UP bnd       X107                 1
 UP bnd       X108                 1
 UP bnd       X109                 1
 UP bnd       X110                 1
 UP bnd       X111                 1
 UP bnd       X112                 1
 UP bnd       X113                 1
 UP bnd       X114                 1
 UP bnd       X115                 1
 UP bnd       X116                 1
 UP bnd       X117                 1
 UP bnd       X118                 1
 UP bnd       X119                 1
 UP bnd       X120                 1
 UP bnd       X121                 1
 UP bnd       X122                 1
 UP bnd       X123                 1
 UP bnd       X124                 1
 UP bnd       X125                 1
 UP bnd       X126                 1
 UP bnd       X127                 1
 UP bnd       X128                 1
 UP bnd       X129                 1
 UP bnd       X130                 1
 UP bnd       X131                 1
 UP bnd       X132                 1
 UP bnd       X133                 1
 UP bnd       X134                 1
 UP bnd       X135                 1
 UP bnd       X136                 1
 UP bnd       X137                 1
 UP bnd       X138                 1
 UP bnd       X139                 1
 UP bnd       X140                 1
 UP bnd       X141                 1
 UP bnd       X142                 1
 UP bnd       X143                 1
 UP bnd       X144                 1
 UP bnd       X145                 1
 UP bnd       X146                 1
 UP bnd       X147                 1
 UP bnd       X148                 1
 UP bnd       X149                 1
 UP bnd       X150                 1
 UP bnd       X151                 1
 UP bnd       X152                 1
 UP bnd       X153                 1
 UP bnd       X154                 1
 UP bnd       X155                 1
 UP bnd       X156                 1
 UP bnd       X157                 1
 UP bnd       X158                 1
 UP bnd       X159                 1
 UP bnd       X160                 1
 UP bnd       X161                 1
 UP bnd       X162                 1
 UP bnd       X163                 1
 UP bnd       X164                 1
 UP bnd       X165                 1
 UP bnd       X166                 1
 UP bnd       X167                 1
 UP bnd       X168                 1
 UP bnd       X169                 1
 UP bnd       X170                 1
 UP bnd       X171                 1
 UP bnd       X172                 1
 UP bnd       X173                 1
 UP bnd       X174                 1
 UP bnd       X175                 1
 UP bnd       X176                 1
 UP bnd       X177                 1
 UP bnd       X178                 1
 UP bnd       X179                 1
 UP bnd       X180                 1
 UP bnd       X181                 1
 UP bnd       X182                 1
 UP bnd       X183                 1
 UP bnd       X184                 1
 UP bnd       X185                 1
 UP bnd       X186                 1
 UP bnd       X187                 1
 UP bnd       X188                 1
 UP bnd       X189                 1
 UP bnd       X190                 1
 UP bnd       X191                 1
 UP bnd       X192                 1
 UP bnd       X193                 1
 UP bnd       X194                 1
 UP bnd       X195                 1
 UP bnd       X196                 1
 UP bnd       X197                 1
 UP bnd       X198                 1
 UP bnd       X199                 1
 UP bnd       X200                 1
 UP bnd       X201                 1
 UP bnd       X202                 1
 UP bnd       X203                 1
 UP bnd       X204                 1
 UP bnd       X205                 1
 UP bnd       X206                 1
 UP bnd       X207                 1
 UP bnd       X208                 1
 UP bnd       X209                 1
 UP bnd       X210                 1
 UP bnd       X211                 1
 UP bnd       X212                 1
 UP bnd       X213                 1
 UP bnd       X214                 1
 UP bnd       X215                 1
 UP bnd       X216                 1
 UP bnd       X217                 1
 UP bnd       X218                 1
 UP bnd       X219                 1
 UP bnd       X220                 1
 UP bnd       X221                 1
 UP bnd       X222                 1
 UP bnd       X223                 1
 UP bnd       X224                 1
 UP bnd       X225                 1
 UP bnd       X226                 1
 UP bnd       X227                 1
 UP bnd       X228                 1
 UP bnd       X229                 1
 UP bnd       X230                 1
 UP bnd       X231                 1
 UP bnd       X232                 1
 UP bnd       X233                 1
 UP bnd       X234                 1
 UP bnd       X235                 1
 UP bnd       X236                 1
 UP bnd       X237                 1
 UP bnd       X238                 1
 UP bnd       X239                 1
 UP bnd       X240                 1
 UP bnd       X241                 1
 UP bnd       X242                 1
 UP bnd       X243                 1
 UP bnd       X244                 1
 UP bnd       X245                 1
 UP bnd       X246                 1
 UP bnd       X247                 1
 UP bnd       X248                 1
 UP bnd       X249                 1
 UP bnd       X250                 1
 UP bnd       X251                 1
 UP bnd       Y0                   6
 UP bnd       Y1                  13
 UP bnd       Y2                  21
 UP bnd       Y3                  11
 UP bnd       Y4                  20
 UP bnd       Y5                   4
 UP bnd       Y6                  21
 UP bnd       Y7                  13
 UP bnd       Y8                  20
 UP bnd       Y9                   9
 UP bnd       Y10                  7
 UP bnd       Y11                 18
 UP bnd       Y12                 14
 UP bnd       Y13                 21
 UP bnd       Y14                 21
 UP bnd       Y15                 21
 UP bnd       Y16                 11
 UP bnd       Y17                  8
 UP bnd       Y18                  6
 UP bnd       Y19                 13
 UP bnd       Y20                 19
 UP bnd       Y21                 11
 UP bnd       Y22                 19
 UP bnd       Y23                  4
 UP bnd       Y24                 19
 UP bnd       Y25                 13
 UP bnd       Y26                 19
 UP bnd       Y27                  9
 UP bnd       Y28                  7
 UP bnd       Y29                 18
 UP bnd       Y30                 14
 UP bnd       Y31                 19
 UP bnd       Y32                 19
 UP bnd       Y33                 19
 UP bnd       Y34                 11
 UP bnd       Y35                  8
 UP bnd       Y36                  6
 UP bnd       Y37                 13
 UP bnd       Y38                 21
 UP bnd       Y39                 11
 UP bnd       Y40                 20
 UP bnd       Y41                  4
 UP bnd       Y42                 24
 UP bnd       Y43                 13
 UP bnd       Y44                 20
 UP bnd       Y45                  9
 UP bnd       Y46                  7
 UP bnd       Y47                 18
 UP bnd       Y48                 14
 UP bnd       Y49                 22
 UP bnd       Y50                 24
 UP bnd       Y51                 24
 UP bnd       Y52                 11
 UP bnd       Y53                  8
 UP bnd       Y54                  6
 UP bnd       Y55                 10
 UP bnd       Y56                 10
 UP bnd       Y57                 10
 UP bnd       Y58                 10
 UP bnd       Y59                  4
 UP bnd       Y60                 10
 UP bnd       Y61                 10
 UP bnd       Y62                 10
 UP bnd       Y63                  9
 UP bnd       Y64                  7
 UP bnd       Y65                 10
 UP bnd       Y66                 10
 UP bnd       Y67                 10
 UP bnd       Y68                 10
 UP bnd       Y69                 10
 UP bnd       Y70                 10
 UP bnd       Y71                  8
 UP bnd       Y72                  6
 UP bnd       Y73                 13
 UP bnd       Y74                 21
 UP bnd       Y75                 11
 UP bnd       Y76                 20
 UP bnd       Y77                  4
 UP bnd       Y78                 27
 UP bnd       Y79                 13
 UP bnd       Y80                 20
 UP bnd       Y81                  9
 UP bnd       Y82                  7
 UP bnd       Y83                 18
 UP bnd       Y84                 14
 UP bnd       Y85                 22
 UP bnd       Y86                 27
 UP bnd       Y87                 27
 UP bnd       Y88                 11
 UP bnd       Y89                  8
 UP bnd       Y90                  6
 UP bnd       Y91                 13
 UP bnd       Y92                 21
 UP bnd       Y93                 11
 UP bnd       Y94                 20
 UP bnd       Y95                  4
 UP bnd       Y96                 25
 UP bnd       Y97                 13
 UP bnd       Y98                 20
 UP bnd       Y99                  9
 UP bnd       Y100                 7
 UP bnd       Y101                18
 UP bnd       Y102                14
 UP bnd       Y103                22
 UP bnd       Y104                25
 UP bnd       Y105                25
 UP bnd       Y106                11
 UP bnd       Y107                 8
 UP bnd       Y108                 6
 UP bnd       Y109                10
 UP bnd       Y110                10
 UP bnd       Y111                10
 UP bnd       Y112                10
 UP bnd       Y113                 4
 UP bnd       Y114                10
 UP bnd       Y115                10
 UP bnd       Y116                10
 UP bnd       Y117                 9
 UP bnd       Y118                 7
 UP bnd       Y119                10
 UP bnd       Y120                10
 UP bnd       Y121                10
 UP bnd       Y122                10
 UP bnd       Y123                10
 UP bnd       Y124                10
 UP bnd       Y125                 8
 UP bnd       Y126                 6
 UP bnd       Y127                13
 UP bnd       Y128                16
 UP bnd       Y129                11
 UP bnd       Y130                16
 UP bnd       Y131                 4
 UP bnd       Y132                16
 UP bnd       Y133                13
 UP bnd       Y134                16
 UP bnd       Y135                 9
 UP bnd       Y136                 7
 UP bnd       Y137                16
 UP bnd       Y138                14
 UP bnd       Y139                16
 UP bnd       Y140                16
 UP bnd       Y141                16
 UP bnd       Y142                11
 UP bnd       Y143                 8
 UP bnd       Y144                 6
 UP bnd       Y145                13
 UP bnd       Y146                17
 UP bnd       Y147                11
 UP bnd       Y148                17
 UP bnd       Y149                 4
 UP bnd       Y150                17
 UP bnd       Y151                13
 UP bnd       Y152                17
 UP bnd       Y153                 9
 UP bnd       Y154                 7
 UP bnd       Y155                17
 UP bnd       Y156                14
 UP bnd       Y157                17
 UP bnd       Y158                17
 UP bnd       Y159                17
 UP bnd       Y160                11
 UP bnd       Y161                 8
 UP bnd       Y162                 6
 UP bnd       Y163                13
 UP bnd       Y164                21
 UP bnd       Y165                11
 UP bnd       Y166                20
 UP bnd       Y167                 4
 UP bnd       Y168                35
 UP bnd       Y169                13
 UP bnd       Y170                20
 UP bnd       Y171                 9
 UP bnd       Y172                 7
 UP bnd       Y173                18
 UP bnd       Y174                14
 UP bnd       Y175                22
 UP bnd       Y176                33
 UP bnd       Y177                38
 UP bnd       Y178                11
 UP bnd       Y179                 8
 UP bnd       Y180                 6
 UP bnd       Y181                13
 UP bnd       Y182                21
 UP bnd       Y183                11
 UP bnd       Y184                20
 UP bnd       Y185                 4
 UP bnd       Y186                22
 UP bnd       Y187                13
 UP bnd       Y188                20
 UP bnd       Y189                 9
 UP bnd       Y190                 7
 UP bnd       Y191                18
 UP bnd       Y192                14
 UP bnd       Y193                22
 UP bnd       Y194                22
 UP bnd       Y195                22
 UP bnd       Y196                11
 UP bnd       Y197                 8
 UP bnd       Y198                 6
 UP bnd       Y199                13
 UP bnd       Y200                21
 UP bnd       Y201                11
 UP bnd       Y202                20
 UP bnd       Y203                 4
 UP bnd       Y204                33
 UP bnd       Y205                13
 UP bnd       Y206                20
 UP bnd       Y207                 9
 UP bnd       Y208                 7
 UP bnd       Y209                18
 UP bnd       Y210                14
 UP bnd       Y211                22
 UP bnd       Y212                33
 UP bnd       Y213                33
 UP bnd       Y214                11
 UP bnd       Y215                 8
 UP bnd       Y216                 6
 UP bnd       Y217                13
 UP bnd       Y218                21
 UP bnd       Y219                11
 UP bnd       Y220                20
 UP bnd       Y221                 4
 UP bnd       Y222                22
 UP bnd       Y223                13
 UP bnd       Y224                20
 UP bnd       Y225                 9
 UP bnd       Y226                 7
 UP bnd       Y227                18
 UP bnd       Y228                14
 UP bnd       Y229                22
 UP bnd       Y230                22
 UP bnd       Y231                22
 UP bnd       Y232                11
 UP bnd       Y233                 8
 UP bnd       Y234                 6
 UP bnd       Y235                13
 UP bnd       Y236                21
 UP bnd       Y237                11
 UP bnd       Y238                20
 UP bnd       Y239                 4
 UP bnd       Y240                26
 UP bnd       Y241                13
 UP bnd       Y242                20
 UP bnd       Y243                 9
 UP bnd       Y244                 7
 UP bnd       Y245                18
 UP bnd       Y246                14
 UP bnd       Y247                22
 UP bnd       Y248                26
 UP bnd       Y249                26
 UP bnd       Y250                11
 UP bnd       Y251                 8
ENDATA
