# Supplementary material
Source: ML conference proceedings conference paper supplement (https://proceedings.mlr.press/v139/carderera21a.html)
Supplement: Supplementary file 2 [file carderera21a-supp.zip › supp/Parameter-free-LaCG-code-submission/examples/objective_functions/example_quadratic.json]

{
    "name" : "Sample Quadratic",
    "class_name" : "Quadratic",
    "args" : {
        "dim" : 4900
    }
}
