# Supplementary material
Source: ML conference proceedings conference paper supplement (https://proceedings.mlr.press/v139/carderera21a.html)
Supplement: Supplementary file 2 [file carderera21a-supp.zip › supp/Parameter-free-LaCG-code-submission/examples/plots/example_plot_config.json]

{
  "list_x_axis": ["iteration", "time"],
  "y_axis": "primal_gap",
  "run_results": [
    {
      "name": "AFW",
      "path_to_result": "abs/path/to/results/AFW",
      "color": "b",
      "marker": "^"
    },
    {
      "name": "PF-LaCG",
      "path_to_result": "abs/path/to/results/PF-LaCG",
      "color": "r",
      "marker": "s"
    }
  ],
  "known_optimal_f_val": 0.0,
  "title": null,
  "log_x": false,
  "log_y": true,
  "list_legend_location": [
    1,
    null
  ],
  "put_legend_outside": false,
  "list_x_limits": [
    null,
    null
  ],
  "y_limits": [0.0001, 10000],
  "dpi": 600,
  "figsize": [
    10,
    5
  ],
  "hide_y_label" : true,
  "marker_size": 12,
  "title_font_size": 19,
  "label_font_size": 18,
  "axis_font_size": 16,
  "legend_font_size": 15,
  "linewidth_figures": 3.0
}
