# Supplementary material
Source: ML conference proceedings conference paper supplement (https://proceedings.mlr.press/v139/carderera21a.html)
Supplement: Supplementary file 2 [file carderera21a-supp.zip › supp/Parameter-free-LaCG-code-submission/Optimized_Code_for_ProbSimplex/examples/algorithms/example_DICG.json]

[
    {
        "name" : "DICG",
        "class_name" : "FrankWolfeSimplex",
        "args" : { "fw_variant" : "DIPFW",
				   "step_type" : "line_search"
        }
    }
]
