# Supplementary material
Source: ML conference proceedings conference paper supplement (https://proceedings.mlr.press/v139/carderera21a.html)
Supplement: Supplementary file 2 [file carderera21a-supp.zip › supp/Parameter-free-LaCG-code-submission/Optimized_Code_for_ProbSimplex/examples/algorithms/example_PFLaCG.json]

[
  {
    "name": "PFLaCG-AFW-Iter",
    "class_name": "ParameterFreeLaCGSimplex",
    "args": {
      "fw_variant": "AFW",
      "iter_sync": true
    }
  }
]
