# Supplementary material
Source: ML conference proceedings conference paper supplement (https://proceedings.mlr.press/v139/carderera21a.html)
Supplement: Supplementary file 2 [file carderera21a-supp.zip › supp/Parameter-free-LaCG-code-submission/Optimized_Code_for_ProbSimplex/pflacg/algorithms/__init__.py]

from pflacg.algorithms._algorithms_utils import ExitCriterion
from pflacg.algorithms.pflacg_simplex import ParameterFreeLaCGSimplex
from pflacg.algorithms.fw_variants_simplex import FrankWolfeSimplex
