# Supplementary material
Source: ML conference proceedings conference paper supplement (https://proceedings.mlr.press/v139/carderera21a.html)
Supplement: Supplementary file 2 [file carderera21a-supp.zip › supp/Parameter-free-LaCG-code-submission/Optimized_Code_for_ProbSimplex/pflacg/experiments/__init__.py]

from pflacg.experiments.feasible_regions import (
    ProbabilitySimplexPolytope,
)
from pflacg.experiments.objective_functions import (
    Quadratic,
)
