# Supplementary material
Source: ML conference proceedings conference paper supplement (https://proceedings.mlr.press/v139/carderera21a.html)
Supplement: Supplementary file 2 [file carderera21a-supp.zip › supp/Parameter-free-LaCG-code-submission/pflacg/experiments/__init__.py]

from pflacg.experiments.feasible_regions import (
    ConvexHull,
    BirkhoffPolytope,
    ConstrainedBirkhoffPolytope,
    ProbabilitySimplexPolytope,
    L1UnitBallPolytope,
    ConstrainedL1BallPolytope,
    GeneralPolytope,
    L2UnitBallPolytope,
    Spectrahedron,
    FlowPolytope,
)
from pflacg.experiments.objective_functions import (
    Quadratic,
    QuadraticSparse,
    HuberLoss,
    QuadraticDiagonal,
    RegularizedObjectiveFunction,
    GraphicalLasso,
    LogisticRegression,
)
