# Supplementary material
Source: ML conference proceedings conference paper supplement (https://proceedings.mlr.press/v139/carderera21a.html)
Supplement: Supplementary file 2 [file carderera21a-supp.zip › supp/Parameter-free-LaCG-code-submission/pflacg/experiments/feasible_regions.py]

# codeing=utf-8
"""This module contains feasible region classes for the experiements."""

from abc import ABC, abstractmethod
import logging
import math

from cvxopt import matrix, sparse, solvers
import networkx as nx
import numpy as np
from scipy.optimize import linprog
from scipy.sparse.linalg import eigsh

from pflacg.experiments.experiments_helper import max_vertex

from gurobipy import GRB, read, Column

run_config_gurobi = {
        'solution_only': True,
        'verbosity': 'normal',
        'OutputFlag': 0,
        'dual_gap_acc': 1e-06,
        'runningTimeLimit': None,
        'use_LPSep_oracle': True,
        'max_lsFW': 100000,
        'strict_dropSteps': True,
        'max_stepsSub': 100000,
        'max_lsSub': 100000,
        'LPsolver_timelimit': 100000,
        'K': 1
        }


if __name__ == "__main__":
    logging.basicConfig(
        level=logging.INFO,
        format="%(levelname)s :: %(asctime)s :: %(message)s",
        datefmt="%Y-%m-%d %H:%M:%S",
    )
LOGGER = logging.getLogger()


# Helper functions


# Generate a valid DAG such that we can solve the shortest path problem.
def generateRandomGraph(n, p):
    DG = nx.gnr_graph(n, p)
    return DG


# Graph with a source and a sink, and a number of layers specified by layers
# and a number of nodes per layer equal to nodes_per_layer.
def generateStructuredGraph(layers, nodes_per_layer):
    m = layers
    s = nodes_per_layer
    DG = nx.DiGraph()
    DG.add_nodes_from(range(0, m * s + 1))
    # Add first edges between source
    DG.add_edges_from([(0, x + 1) for x in range(s)])
    # Add all the edges in the subsequent layers.
    for i in range(m - 1):
        DG.add_edges_from(
            [(x + 1 + s * i, y + 1 + s * (i + 1)) for x in range(s) for y in range(s)]
        )
    DG.add_edges_from([(x + 1 + s * (m - 1), m * s + 1) for x in range(s)])
    return DG


# Core classes


class _AbstractFeasibleRegion(ABC):
    """An abstract class to construct feasible region objects."""

    def __init__(self, *args, **kwargs):
        """Initialise abstract feasible region class."""
        pass

    @property
    def initial_point(self):
        raise NotImplementedError(
            "Initial point has not been set for this feasible region!"
        )

    @property
    def initial_active_set(self):
        raise NotImplementedError(
            "Initial active set has not been set for this feasible region!"
        )

    @abstractmethod
    def lp_oracle(self, d):
        """
        Compute the linear oracle.

        Parameters
        ----------
        d : np.ndarray
            The direction.

        Returns
        -------
        np.ndarray
        """

        pass

    @abstractmethod
    def away_oracle(self, d, point_x):
        """
        Compute the away oracle.

        Parameters
        ----------
        d: np.ndarray
            The direction.
        point_x: Point
            Point x with its proper support.

        Returns
        -------
        Point
        """

        pass

    def projection(self, x, accuracy):
        raise NotImplementedError(
            "Projection has not been implemented for this feasible region!"
        )


class ConvexHull(_AbstractFeasibleRegion):
    """Convex hull given a set of vertice."""

    def __init__(self, vertices):
        self.vertices = vertices

    @property
    def initial_point(self):
        return self.vertices[0]

    @property
    def initial_active_set(self):
        return [self.vertices[0]]

    def lp_oracle(self, d):
        val, index = d.dot(self.vertices[0]), 0
        for _index, vertex in enumerate(self.vertices):
            _val = d.dot(vertex)
            if _val < val:
                val, index = _val, _index
        return self.vertices[index]

    def away_oracle(self, d, point_x):
        return max_vertex(d, point_x.support)

    def projection(self, x, accuracy):
        pass

class gurobi_MIP(_AbstractFeasibleRegion):
    """LP model implemented via Gurobi."""
    def __init__(self, modelFilename):
        model = read(modelFilename)
        model.params.TimeLimit = run_config_gurobi['LPsolver_timelimit']
        model.setParam('OutputFlag', False)
        model.params.threads = 4
        model.params.MIPFocus = 0
        model.update()
        self.dim = len(model.getVars())
        self.model = model
        return 

    @property
    def initial_point(self):
        v = np.ones(self.dim)
        return self.lp_oracle(v)

    @property
    def initial_active_set(self):
        return [self.initial_point()]

    def lp_oracle(self, cc):
        m = self.model
        for it, v in enumerate(m.getVars()):
            v.setAttr(GRB.attr.Obj, cc[it])
        #Update the model with the new atributes.
        m.update()
        m.optimize(lambda mod, where: self.fakeCallback(mod, where, GRB.INFINITY))
        # Status checking
        status = m.getAttr(GRB.Attr.Status)
        if status == GRB.INF_OR_UNBD or \
           status == GRB.INFEASIBLE  or \
           status == GRB.UNBOUNDED:
            assert False, "The model cannot be solved because it is infeasible or unbounded"
        if status != GRB.OPTIMAL:
            print(status)
            assert False, "Optimization was stopped."
        #Store the solution that will be outputted.
        solution = np.array([v.x for v in m.getVars()], dtype=float)[:]
        #Check that the initial number of constraints and the final number is the same.
        return solution
    
    def away_oracle(self, grad, point_x):
        return max_vertex(grad, point_x.support)

    def fakeCallback(self, model, where, value):
       ggEps = 1e-08
       if where == GRB.Callback.MIPSOL:
           obj = model.cbGet(GRB.Callback.MIPSOL_OBJ)
       if where == GRB.Callback.MIP:
           objBnd = model.cbGet(GRB.Callback.MIP_OBJBND)
           if objBnd >= value + ggEps:
               pass


class BirkhoffPolytope(_AbstractFeasibleRegion):
    def __init__(self, dim):
        self.dim = dim
        self.mat_dim = int(np.sqrt(dim))

    @property
    def initial_point(self):
        return np.identity(self.mat_dim).flatten()

    @property
    def initial_active_set(self):
        return [self.initial_point()]

    def lp_oracle(self, d):
        from scipy.optimize import linear_sum_assignment

        objective = d.reshape((self.mat_dim, self.mat_dim))
        matching = linear_sum_assignment(objective)
        solution = np.zeros((self.mat_dim, self.mat_dim))
        solution[matching] = 1
        return solution.reshape(self.dim)

    def away_oracle(self, grad, point_x):
        return max_vertex(grad, point_x.support)


class ConstrainedBirkhoffPolytope(_AbstractFeasibleRegion):
    def __init__(
        self,
        dim,
        const_vector_ineq=None,
        const_matrix_ineq=None,
        const_matrix_eq=None,
        const_vector_eq=None,
        linear_equality_vector=None,
        scipy_solver="revised simplex",
    ):
        self.dim = dim
        self.matdim = int(np.sqrt(dim))
        self.scipy_solver = scipy_solver

        self.A = np.zeros((2 * self.matdim - 1, self.dim))
        # Condition on the columns
        for j in range(self.matdim):
            for i in range(self.matdim):
                self.A[j, int(i * self.matdim) + j] = 1.0
        # Condition on the rows
        for j in range(self.matdim - 1):
            for i in range(self.matdim):
                self.A[self.matdim + j, int(j * self.matdim) + i] = 1.0
        if linear_equality_vector is not None:
            self.b = linear_equality_vector
        else:
            self.b = np.ones(2 * self.matdim - 1)

        if const_matrix_ineq is not None and const_vector_ineq is not None:
            num_ineq_constraints, dim_ineq_constraints = const_matrix_ineq.shape
            if not dim_ineq_constraints == self.dim:
                raise ValueError(
                    "Dimension of the inequality constraints does not match the dimensionality of the problem."
                )
            self.G = const_matrix_ineq
            self.h = const_vector_ineq
        else:
            self.G = None
            self.h = None

        if const_matrix_eq is not None and const_vector_eq is not None:
            num_eq_constraints, dim_eq_constraints = const_matrix_eq.shape
            if not dim_eq_constraints == self.dim:
                raise ValueError(
                    "Dimension of the equality constraints does not match the dimensionality of the problem."
                )
            self.A = np.vstack(
                (
                    self.A,
                    const_matrix_eq,
                )
            )
            self.b = np.append(self.b, const_vector_eq).tolist()

    @property
    def initial_point(self):
        c = np.ones(self.dim)
        return self.lp_oracle(c)

    @property
    def initial_active_set(self):
        return [self.initial_point()]

    def lp_oracle(self, x):
        res = linprog(
            x,
            A_ub=self.G,
            b_ub=self.h,
            A_eq=self.A,
            b_eq=self.b,
            method=self.scipy_solver,
            bounds=(0.0, np.inf),
        )
        if not res.status == 0:
            raise Exception("LP oracle did not return succesfully.")
        optimum = np.array(res.x)
        return optimum.flatten()

    def away_oracle(self, grad, point_x):
        return max_vertex(grad, point_x.support)


class ProbabilitySimplexPolytope(_AbstractFeasibleRegion):
    def __init__(self, dim):
        self.dim = dim

    @property
    def initial_point(self):
        v = np.zeros(self.dim)
        v[0] = 1.0
        return v

    @property
    def initial_active_set(self):
        return [self.initial_point()]

    def lp_oracle(self, x):
        v = np.zeros(len(x), dtype=float)
        v[np.argmin(x)] = 1.0
        return v

    #     #This is a faster implementation of the away oracle without having to loop through active set.
    #    def away_oracle(self, grad, x):
    #        aux = np.multiply(grad, np.sign(x))
    #        indices = np.where(x > 0.0)[0]
    #        v = np.zeros(len(x), dtype=float)
    #        index_max = indices[np.argmax(aux[indices])]
    #        v[index_max] = 1.0
    #        return v, index_max

    def away_oracle(self, grad, point_x):
        return max_vertex(grad, point_x.support)

    def projection(self, x):
        (n,) = x.shape  # will raise ValueError if v is not 1-D
        if x.sum() == 1.0 and np.alltrue(x >= 0):
            return x
        v = x - np.max(x)
        u = np.sort(v)[::-1]
        cssv = np.cumsum(u)
        rho = np.count_nonzero(u * np.arange(1, n + 1) > (cssv - 1.0)) - 1
        theta = float(cssv[rho] - 1.0) / (rho + 1)
        w = (v - theta).clip(min=0)
        return w


class L1UnitBallPolytope(_AbstractFeasibleRegion):
    def __init__(self, dim):
        self.dim = dim

    @property
    def initial_point(self):
        v = np.zeros(self.dim)
        v[0] = 1.0
        return v

    @property
    def initial_active_set(self):
        return [self.initial_point()]

    def lp_oracle(self, x):
        v = np.zeros(len(x), dtype=float)
        max_ind = np.argmax(np.abs(x))
        v[max_ind] = -1.0 * np.sign(x[max_ind])
        return v

    def away_oracle(self, grad, point_x):
        return max_vertex(grad, point_x.support)

    def projection(self, x):
        u = np.abs(x)
        if u.sum() <= 1.0:
            return x
        w = self.projectionSimplex(u)
        w *= np.sign(x)
        return w

    def projectionSimplex(self, x):
        (n,) = x.shape  # will raise ValueError if v is not 1-D
        if x.sum() == 1.0 and np.alltrue(x >= 0):
            return x
        v = x - np.max(x)
        u = np.sort(v)[::-1]
        cssv = np.cumsum(u)
        rho = np.count_nonzero(u * np.arange(1, n + 1) > (cssv - 1.0)) - 1
        theta = float(cssv[rho] - 1.0) / (rho + 1)
        w = (v - theta).clip(min=0)
        return w


class ConstrainedL1BallPolytope(_AbstractFeasibleRegion):
    def __init__(
        self,
        l1_regularization,
        dim,
        const_matrix_ineq=None,
        const_vector_ineq=None,
        const_matrix_eq=None,
        const_vector_eq=None,
        solver_type="cvxopt",
        scipy_solver="revised simplex",
        sparse_solver=False,
    ):
        self.dim = dim
        self.l1_regularization = l1_regularization
        self.solver_type = solver_type
        if not (solver_type == "cvxopt" or solver_type == "scipy"):
            raise TypeError("Wrong solver type")
        if solver_type == "cvxopt":
            solvers.options["show_progress"] = False
        else:
            self.scipy_solver = scipy_solver
        if sparse_solver and not solver_type == "cvxopt":
            raise TypeError("scipy solver cannot handle sparse matrices.")
        simplex_dimensionality = int(2 * dim)
        if const_matrix_ineq is not None and const_vector_ineq is not None:
            num_ineq_constraints, dim_ineq_constraints = const_matrix_ineq.shape
            if not (dim_ineq_constraints == self.dim):
                raise ValueError(
                    "Dimension of the inequality constraints does not match the dimensionality of the problem."
                )
            self.G = np.vstack(
                (
                    np.hstack((const_matrix_ineq, -const_matrix_ineq)),
                    -np.identity(simplex_dimensionality),
                )
            )
            self.h = np.append(const_vector_ineq, np.zeros(simplex_dimensionality))
            if solver_type == "cvxopt":
                self.G = matrix(
                    self.G,
                    (
                        simplex_dimensionality + num_ineq_constraints,
                        simplex_dimensionality,
                    ),
                )
                if sparse_solver:
                    self.G = sparse(self.G)
                self.h = matrix(
                    self.h, (simplex_dimensionality + num_ineq_constraints, 1)
                )
        else:
            self.G = -np.identity(simplex_dimensionality)
            self.h = np.zeros(simplex_dimensionality)
            if solver_type == "cvxopt":
                self.G = matrix(
                    self.G,
                )
                self.h = matrix(self.h, (simplex_dimensionality, 1))
                if sparse_solver:
                    self.G = sparse(self.G)

        if const_matrix_eq is not None and const_vector_eq is not None:
            num_eq_constraints, dim_eq_constraints = const_matrix_eq.shape
            if not dim_eq_constraints == self.dim:
                raise ValueError(
                    "Dimension of the equality constraints does not match the dimensionality of the problem."
                )
            self.A = np.vstack(
                (
                    np.hstack((const_matrix_eq, -const_matrix_eq)),
                    np.ones(simplex_dimensionality),
                )
            )
            self.b = np.append(const_vector_eq, self.l1_regularization).tolist()
            if solver_type == "cvxopt":
                self.A = matrix(
                    self.A, (1 + num_eq_constraints, simplex_dimensionality)
                )
                self.b = matrix(self.b, (1 + len(const_vector_eq), 1), "d")
                if sparse_solver:
                    self.A = sparse(self.A)
        else:
            self.A = np.ones(simplex_dimensionality)
            self.b = self.l1_regularization
            if solver_type == "cvxopt":
                self.A = matrix(self.A, (1, simplex_dimensionality))
                self.b = matrix(self.b)
            else:
                self.A = np.ones(simplex_dimensionality).reshape(
                    (simplex_dimensionality, 1)
                )
                self.b = np.asarray(self.b).reshape((1,))

    @property
    def initial_point(self):
        c = np.ones(self.dim)
        return self.lp_oracle(c)

    @property
    def initial_active_set(self):
        return [self.initial_point()]

    def lp_oracle(self, x):
        cost_vector = np.hstack((x, -x))
        if self.solver_type == "cvxopt":
            sol = solvers.lp(
                matrix(cost_vector),
                self.G,
                self.h,
                self.A,
                self.b,
                solver="cvxopt_glpk",
            )
            if not sol["status"] == "optimal":
                raise Exception("Algorithm did not converge.")
            optimum = np.array(sol["x"])
            return (
                optimum[: int(len(optimum) / 2)] - optimum[int(len(optimum) / 2) :]
            ).flatten()
        else:
            res = linprog(
                cost_vector,
                A_ub=self.G,
                b_ub=self.h,
                A_eq=self.A,
                b_eq=self.b,
                method=self.scipy_solver,
                bounds=(-np.inf, np.inf),
            )
            if not res.status == 0:
                raise Exception("LP oracle did not return succesfully.")
            optimum = np.array(res.x)
            return (
                optimum[: int(len(optimum) / 2)] - optimum[int(len(optimum) / 2) :]
            ).flatten()

    def away_oracle(self, grad, point_x):
        return max_vertex(grad, point_x.support)


class GeneralPolytope(_AbstractFeasibleRegion):
    def __init__(
        self,
        dim,
        const_matrix_ineq=None,
        const_vector_ineq=None,
        const_matrix_eq=None,
        const_vector_eq=None,
        solver_type="cvxopt",
        scipy_solver="revised simplex",
        sparse_solver=False,
    ):
        self.dim = dim
        self.solver_type = solver_type
        if not (solver_type == "cvxopt" or solver_type == "scipy"):
            raise TypeError("Wrong solver type")
        if solver_type == "cvxopt":
            solvers.options["show_progress"] = False
        else:
            self.scipy_solver = scipy_solver
        if sparse_solver and solver_type == "scipy":
            raise TypeError("scipy solver cannot handle sparse matrices.")
        if const_matrix_ineq is not None and const_vector_ineq is not None:
            num_ineq_constraints, dim_ineq_constraints = const_matrix_ineq.shape
            if not dim_ineq_constraints == self.dim:
                raise ValueError(
                    "Dimension of the inequality constraints does not match the dimensionality of the problem."
                )
            self.G = const_matrix_ineq
            self.h = const_vector_ineq
            if solver_type == "cvxopt":
                self.G = matrix(self.G, (num_ineq_constraints, dim_ineq_constraints))
                if sparse_solver:
                    self.G = sparse(self.G)
                self.h = matrix(self.h, (num_ineq_constraints, 1))
        else:
            self.G = None
            self.h = None

        if const_matrix_eq is not None and const_vector_eq is not None:
            num_eq_constraints, dim_eq_constraints = const_matrix_eq.shape
            if not (dim_eq_constraints == self.dim):
                raise ValueError(
                    "Dimension of the equality constraints does not match the dimensionality of the problem."
                )
            self.A = const_matrix_eq
            self.b = const_vector_eq
            if solver_type == "cvxopt":
                self.A = matrix(self.A, (num_eq_constraints, dim_eq_constraints))
                self.b = matrix(self.b, (num_eq_constraints, 1), "d")
                if sparse_solver:
                    self.A = sparse(self.A)
        else:
            self.A = None
            self.b = None

    @property
    def initial_point(self):
        c = np.ones(self.dim)
        return self.lp_oracle(c)

    @property
    def initial_active_set(self):
        return [self.initial_point()]

    def lp_oracle(self, x):
        if self.solver_type == "cvxopt":
            if self.G is not None and self.h is not None:
                if self.A is not None and self.b is not None:
                    sol = solvers.lp(
                        matrix(x),
                        G=self.G,
                        h=self.h,
                        A=self.A,
                        b=self.b,
                        solver="cvxopt_glpk",
                    )
                else:
                    sol = solvers.lp(
                        matrix(x), G=self.G, h=self.h, solver="cvxopt_glpk"
                    )
            else:
                if self.A is not None and self.b is not None:
                    sol = solvers.lp(
                        matrix(x), A=self.A, b=self.b, solver="cvxopt_glpk"
                    )
                else:
                    raise ValueError("The problem has no constraintsts")
            if not sol["status"] == "optimal":
                raise Exception("Algorithm did not converge.")
            return np.array(sol["x"]).flatten()
        else:
            if self.G is not None and self.h is not None:
                if self.A is not None and self.b is not None:
                    res = linprog(
                        x,
                        A_ub=self.G,
                        b_ub=self.h,
                        A_eq=self.A.T,
                        b_eq=self.b,
                        method=self.scipy_solver,
                        bounds=(-np.inf, np.inf),
                    )
                else:
                    res = linprog(
                        x,
                        A_ub=self.G,
                        b_ub=self.h,
                        method=self.scipy_solver,
                        bounds=(-np.inf, np.inf),
                    )
            else:
                if self.A is not None and self.b is not None:
                    res = linprog(
                        x,
                        A_eq=self.A.T,
                        b_eq=self.b,
                        method=self.scipy_solver,
                        bounds=(-np.inf, np.inf),
                    )
                else:
                    raise ValueError("The problem has no constraintsts")
            if not res.status == 0:
                raise Exception("LP oracle did not return succesfully.")
            return np.array(res.x).flatten()

    def away_oracle(self, grad, point_x):
        return max_vertex(grad, point_x.support)


class L2UnitBallPolytope(_AbstractFeasibleRegion):
    def __init__(self, dim):
        self.dim = dim

    @property
    def initial_point(self):
        v = np.ones(self.dim)
        return v / np.linalg.norm(v)

    @property
    def initial_active_set(self):
        return [self.initial_point()]

    def lp_oracle(self, x):
        return -x / np.linalg.norm(x)

    def away_oracle(self, grad, point_x):
        return max_vertex(grad, point_x.support)

    def projection(self, x):
        return x / np.linalg.norm(x)


class Spectrahedron(_AbstractFeasibleRegion):
    """TODO: Add description."""

    def __init__(self, dim):
        self.dim = dim
        self.matdim = int(np.sqrt(dim))

    def lp_oracle(self, X):
        objective = X.reshape((self.matdim, self.matdim))
        w, v = eigsh(-objective, 1, which="LA", maxiter=100000)
        return (np.outer(v, v)).reshape(self.dim)

    @property
    def initial_point(self):
        return (np.identity(self.matdim) / self.matdim).flatten()

    @property
    def initial_active_set(self):
        return [self.initial_point()]

    def away_oracle(self, grad, point_x):
        return max_vertex(grad, point_x.support)


"""
If graph_type = "Structured":
    param1 = number of layers
    param2 = number of nodes per layer.
    
Otherwise:
Growing network with redirection (GNR) digraph
    param1 = number of nodes
    param2 = The redirection probability.
"""


class FlowPolytope(_AbstractFeasibleRegion):
    """Shortest path problem on a DAG."""

    def __init__(self, param1, param2, graph_type="Structured"):
        # Generate the type of graph that we want
        if graph_type == "Structured":
            self.graph = generateStructuredGraph(param1, param2)
        else:
            self.graph = generateRandomGraph(param1, param2)
        # Sort the graph in topological order
        self.topological_sort = list(nx.topological_sort(self.graph))
        self.dict_indices = self.constructDictionaryIndices(self.graph)
        self.dim = self.graph.number_of_edges()
        return

    @property
    def initial_point(self):
        return self.lp_oracle(np.ones(self.dim))

    @property
    def initial_active_set(self):
        return [self.lp_oracle(np.ones(self.dim))]

    def lp_oracle(self, weight):
        d = math.inf * np.ones(nx.number_of_nodes(self.graph))
        d[self.topological_sort[0]] = 0.0
        p = -np.ones(nx.number_of_nodes(self.graph), dtype=int)
        for u in self.topological_sort:
            for v in self.graph.neighbors(u):
                self.relax(u, v, d, weight, p)

        path_alg = [self.topological_sort[-1]]
        while path_alg[-1] != self.topological_sort[0]:
            path_alg.append(p[path_alg[-1]])
        path_alg.reverse()
        # Reconstruc the vertex.
        outputVect = np.zeros(nx.number_of_edges(self.graph))
        for i in range(len(path_alg) - 1):
            outputVect[self.dict_indices[(path_alg[i], path_alg[i + 1])]] = 1.0
        return outputVect

    def relax(self, i, j, dVect, wVect, pVect):
        if dVect[j] > dVect[i] + wVect[self.dict_indices[(i, j)]]:
            dVect[j] = dVect[i] + wVect[self.dict_indices[(i, j)]]
            pVect[j] = i
        return

    # Function that returns the values of the weights.
    def func(self, u, v, wVect):
        return self.weight[self.dict_indices[(v, u)]]

    # Given a DAG, returns a mapping from the edges to indices from 0 to N
    # where N represents the number of Edges.
    def constructDictionaryIndices(self, graph):
        # Construct a dictionary of the indices
        dictionary = {}
        iter_count = 0
        for i in graph.edges:
            dictionary[i] = iter_count
            iter_count += 1
        return dictionary

        def dim(self):
            return self.dimension

    def plot(self):
        import matplotlib.pyplot as plt

        nx.draw(self.graph)
        plt.show()

    def returnEdges(self):
        return self.graph.edges()

    def topologicalOrdering(self):
        return self.topological_sort

    def away_oracle(self, grad, point_x):
        return max_vertex(grad, point_x.support)

    def dimension(self):
        return self.dim
